# Supplementary material for: Direct aldol reactions catalyzed by intramolecularly folded prolinamide dendrons: dendrimer effects on stereoselectivity
Source: Royal Society of Chemistry journal article supplement (doi:10.1039/b902960e), 2009-01-01
Supplement: b902960e.pdf [file b902960e.pdf]

# Supporting Information

***“Direct Aldol Reactions Catalyzed by Intramolecularly Folded  
Prolinamide Dendrons:  
Dendrimer Effects on the Stereoselectivity”***

Kazuhiko Mitsui, Sarah A. Hyatt, Daniel A. Turner, Christopher M. Hadad and Jon R. Parquette\*

Department of Chemistry, The Ohio State University, Columbus, Ohio 43210

[parquett@chemistry.ohio-state.edu](mailto:parquett@chemistry.ohio-state.edu)

## Table of contents

|    |                                                                                    |       |
|----|------------------------------------------------------------------------------------|-------|
| A. | Selectivity Trends: Plots of enantioselectivity versus dendron generation          | 3-5   |
| B. | General methods                                                                    | 6     |
| C. | General procedure for aldol reactions                                              | 6-7   |
| D. | Representative procedure for aldol reactions                                       | 7     |
| E. | <sup>1</sup> H NMR and chiral HPLC data for aldol adducts                          | 8-10  |
| F. | Reaction schemes                                                                   | 11-13 |
| G. | Experimental procedures for the synthesis of compounds <b>1-9</b> and <b>20-41</b> | 13-39 |
| H. | <sup>1</sup> H-NMR and <sup>13</sup> C-NMR spectrum of <b>1-9</b> and <b>40-41</b> | 40-62 |
| I. | Computational methods                                                              | 63    |
| J. | X-ray Crystallography Details                                                      | 64    |
| J. | References                                                                         | 68    |

### A. Selectivity Trends: Plots of enantioselectivity versus dendron generation.

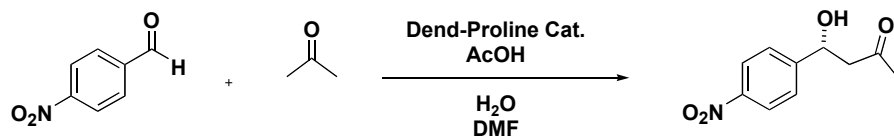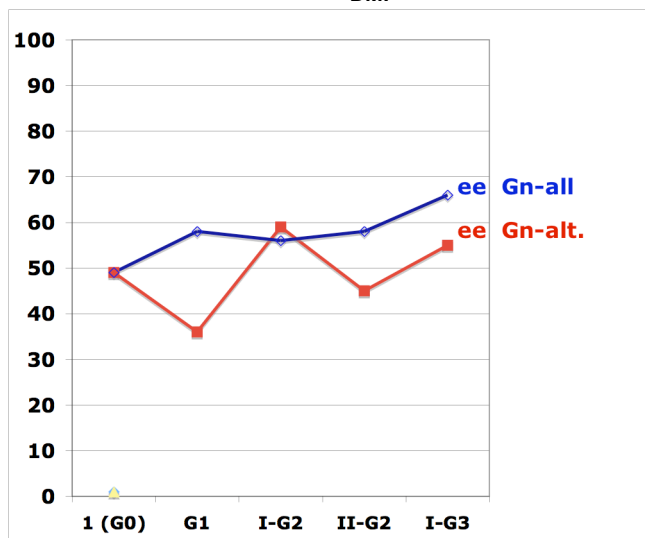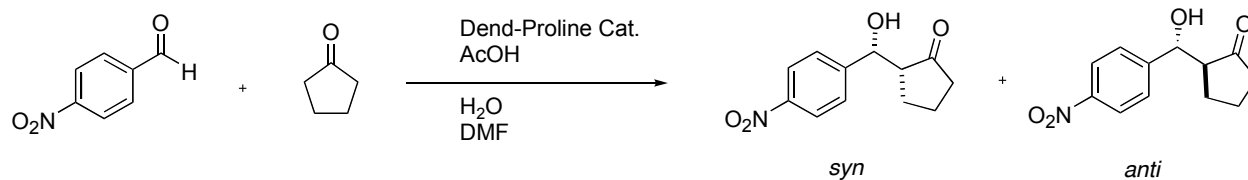

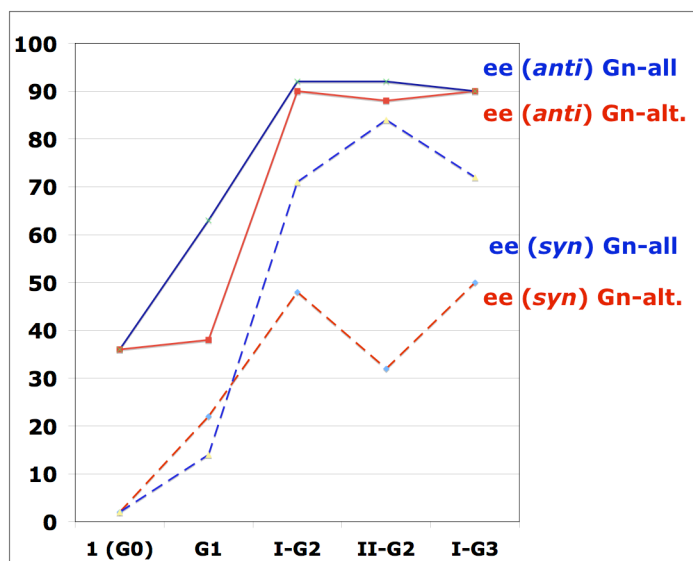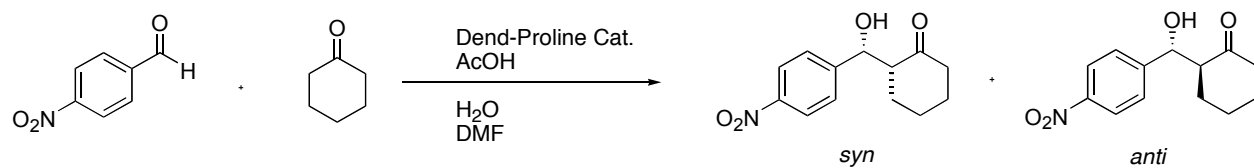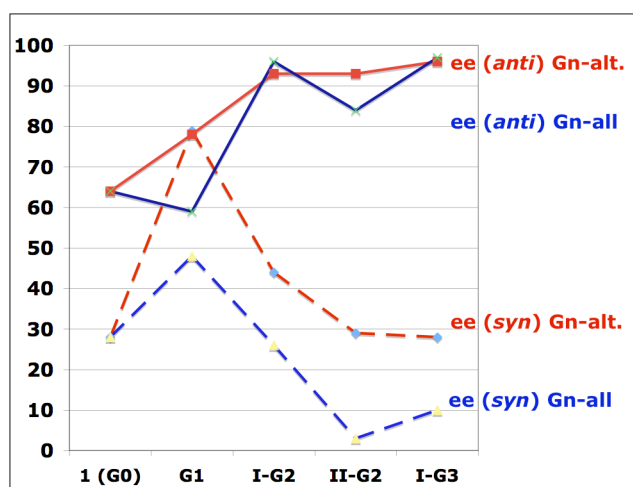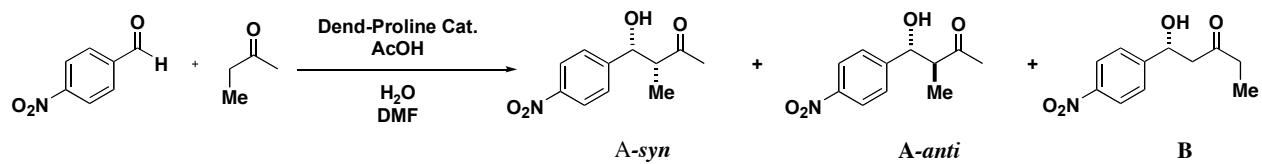

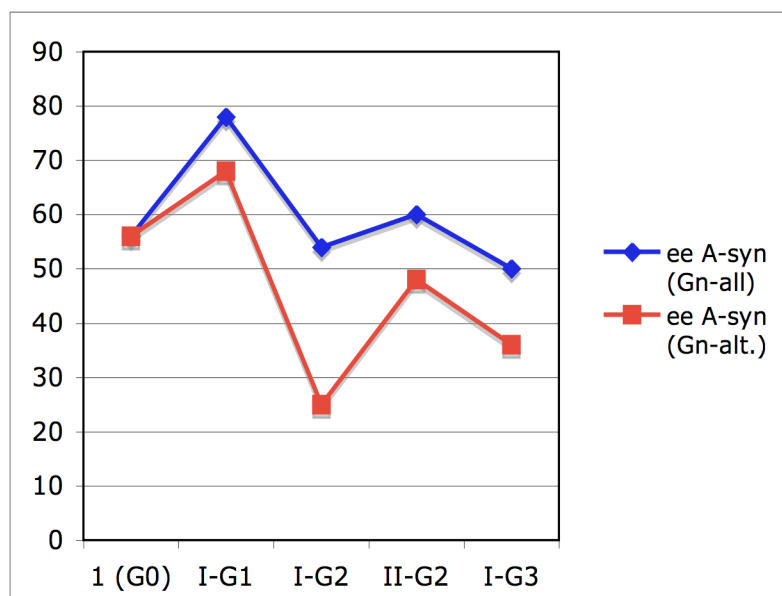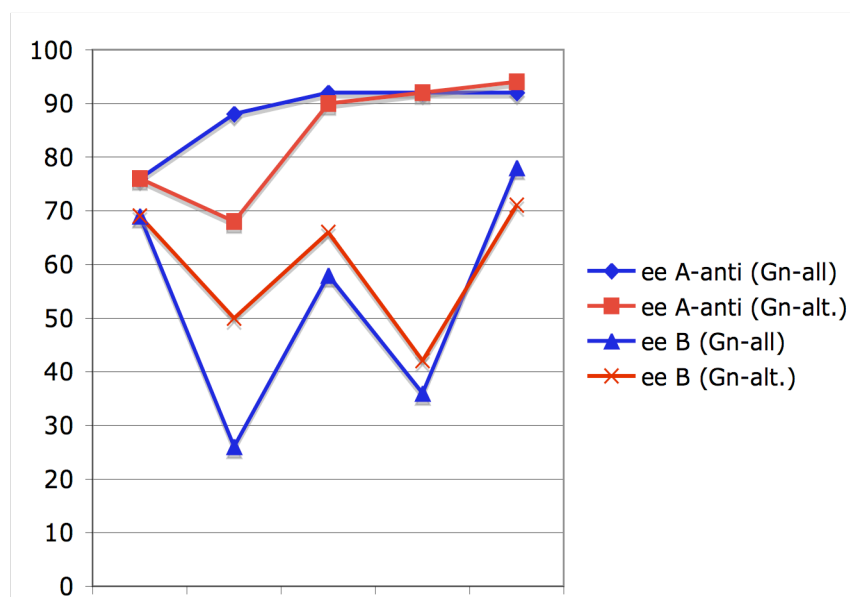

## **Experimental section.**

**B. General Methods.** Melting Points were determined in open capillaries and are uncorrected. Infrared spectra were recorded on a Perkin-Elmer Model 1600 instrument. Fourier transform-infrared (FTIR) were performed on FTIR spectrometer (Thermo Nicolet, Madison, WI).  $^1\text{H}$  NMR were recorded at 400 or 500 MHz and  $^{13}\text{C}$  NMR spectra at 100 or 125 MHz on a Bruker DPX-400 or DPX-500 instrument as indicated. EI or FAB mass spectra were recorded at The Ohio State University Chemical Instrumentation Center. Matrix-assisted laser desorption ionization-time of flight MS (MALDI-TOF MS) spectrometry was performed using 2,5-dihydroxybenzoic acid as the matrix in tetrahydrofuran (THF). All reactions were performed in oven or flame dried glassware under a nitrogen atmosphere unless otherwise noted. N,N-Dimethylformamide (DMF) was dried by distillation from activated 4 Å molecular sieves; Tetrahydrofuran (THF) was distilled from sodium/benzophenone ketyl; dichloromethane was distilled from calcium hydride; pyridine was distilled from calcium hydride; triethylamine was distilled from calcium hydride; chloroform was distilled from calcium carbonate. Boc-Pro-OH

was purchased from Novabiochem and used without further purification. Chromatographic separations were performed on silica gel 60 (230-400 mesh, 60 Å) using the indicated solvents.

**C. General Procedure for Aldol Reaction:** To a solution of catalyst (as indicated in the table, mmol) in DMF (0.5 mL, 1.0M) were added AcOH (1 eq. per prolinamide catalytic unit) and freshly distilled ketone (27 eq). After stirring at rt for 15 min, water (90 µl, 5.0 mmol, 10 eq) and 4-nitrobenzaldehyde (76 mg, 0.5 mmol) were added. The resulting mixture was stirred at rt for the indicated time. The reaction was treated with saturated aqueous ammonium chloride (1 mL). This mixture was diluted with water (20 mL) and extracted with ethyl acetate (3 x 10 mL). The combined organic layers were washed with water (10 mL), brine (10 mL), dried over Na<sub>2</sub>SO<sub>4</sub> and concentrated *in vacuo*. The residue was purified by column chromatography on silica gel (20-40% EtOAc/pet ether) to give pure aldol products.

**D. Representative Procedure for Aldol Reaction between Cyclohexanone and 4-nitrobenzaldehyde Catalyzed by G3-I-All-Cat (5):** To a solution of G3-I-All-Cat (**5**) (13 mg, 0.005 mmol) in anhydrous DMF (0.2 mL) were added AcOH (2.3 µl, 0.04 mmol) and freshly distilled cyclohexanone (0.56 mL, 5.4 mmol). After stirring at rt for 15 min, water (36 µl, 2.0 mmol) and 4-nitrobenzaldehyde (30 mg, 0.2 mmol) were added. The resulting mixture was stirred at rt for 42 h. The reaction was treated with saturated aqueous ammonium chloride (1 mL). This mixture was diluted with water (10 mL) and extracted with ethyl acetate (3 x 10 mL). The combined organic layers were washed with water (10 mL), brine (10 mL), dried over Na<sub>2</sub>SO<sub>4</sub> and concentrated *in vacuo*. The residue was purified by column chromatography on silica gel (20-40% EtOAc/pet ether) to give pure aldol products, 2-[Hydroxy-(4-nitrophenyl)-methyl]-

cyclohexanone (49.5 mg, 0.1985 mmol, 99%), as a white solid. The diastereoselectivity was determined by  $^1\text{H}$  NMR analysis to be 21:1 (*anti:syn*). The enantioselectivity was determined by chiral HPLC (Daicel Chiralpak IA, 20% *i*-PrOH/hexane, UV 254 nm, Flow rate 1.0 mL/min). 97% ee for *anti* isomer (major),  $t_R$  19.3 min, (minor)  $t_R$  13.8 min. 10% ee for *syn* isomer (major),  $t_R$  10.1 min, (minor)  $t_R$  13.5 min.

#### E. $^1\text{H}$ NMR and chiral HPLC data for aldol adducts.

Aldol adducts are all known compounds.<sup>1,2,3</sup>

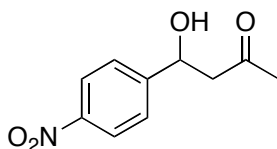

**4-Hydroxy-4-(4-nitrophenyl)butan-2-one (14):**  $^1\text{H}$  NMR (400 MHz,  $\text{CDCl}_3$ )  $\delta$  2.20 (s, 3H), 2.84 (m, 2H), 3.58 (s, 1H), 5.25 (m, 1H), 7.53 (d,  $J = 8.0$  Hz, 2H), 8.21 (d,  $J = 8.0$  Hz, 2H); Chiral HPLC data: Daicel Chiralpak AS-H, 30% *i*-PrOH/hexane, UV 254 nm, Flow rate 1.0 mL/min, Retention times:  $t_R$  12.3 min and  $t_R$  16.3 min.

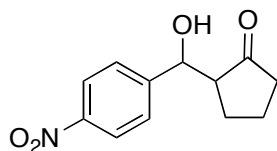

**2-[Hydroxy-(4-nitrophenyl)-methyl]-cyclopentanone (15):** (*anti* isomer)  $^1\text{H}$  NMR (400 MHz,  $\text{CDCl}_3$ )  $\delta$  1.46-1.58 (m, 1H), 1.65-1.78 (m, 2H), 1.95-2.02 (m, 1H), 2.19-2.29 (m, 1H), 2.32-2.47



(m, 2H), 4.70 (s, 1H), 4.82 (d,  $J = 9.2$  Hz, 1H), 7.50 (d,  $J = 8.8$  Hz, 2H), 8.17(d,  $J = 9.0$  Hz, 2H); Chiral HPLC data: Daicel Chiralpak IA, 5% *i*-PrOH/hexane, UV 254 nm, Flow rate 1.0 mL/min, Retention times:  $t_R$  57.1 min and  $t_R$  63.2 min; (*syn* isomer)  $^1\text{H}$  NMR (400 MHz,  $\text{CDCl}_3$ )  $\delta$  1.62-1.75 (m, 2H), 1.88-2.04 (m, 2H), 2.08-2.17 (m, 1H), 2.32-2.40 (m, 1H), 2.43-2.48 (m, 1H), 2.69 (s, 1H), 5.40 (d,  $J = 2.8$  Hz, 1H), 7.50 (d,  $J = 8.8$  Hz, 2H), 8.18 (d,  $J = 8.8$  Hz, 2H); Chiral HPLC data: Daicel Chiralpak IA, 5% *i*-PrOH/hexane, UV 254 nm, Flow rate 1.0 mL/min, Retention times:  $t_R$  30.6 min and  $t_R$  49.4 min.

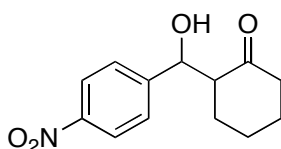

**2-[Hydroxy-(4-nitrophenyl)-methyl]-cyclohexanone (16):** (*anti* isomer)  $^1\text{H}$  NMR (400 MHz,  $\text{CDCl}_3$ )  $\delta$  1.30-1.42 (m, 1H), 1.48-1.71 (m, 3H), 1.78-1.84 (m, 1H), 2.06-2.13 (m, 1H), 2.30-2.39 (m, 1H), 2.45-2.51 (m, 1H), 2.54-2.60 (m, 1H), 4.04 (s, 1H), 4.88 (d,  $J = 8.0$  Hz, 1H), 7.49 (d,  $J = 8.4$  Hz, 2H), 8.19 (d,  $J = 8.5$  Hz, 2H); Chiral HPLC data: Daicel Chiralpak IA, 20% *i*-PrOH/hexane, UV 254 nm, Flow rate 1.0 mL/min, Retention times:  $t_R$  12.4 min and  $t_R$  17.6 min; (*syn* isomer)  $^1\text{H}$  NMR (400 MHz,  $\text{CDCl}_3$ )  $\delta$  1.44-1.77 (m, 4H), 1.84 (d,  $J = 11.5$  Hz, 1H), 2.05-2.13 (m, 1H), 2.33-2.50 (m, 2H), 2.61 (dd,  $J = 12.9$  Hz, 5.5 Hz, 1H), 3.14 (s, 1H), 5.46 (d,  $J = 2.0$  Hz, 1H), 7.47 (d,  $J = 8.9$  Hz, 2H), 8.18 (d,  $J = 9.0$  Hz, 2H); Chiral HPLC data: Daicel Chiralpak IA, 20% *i*-PrOH/hexane, UV 254 nm, Flow rate 1.0 mL/min, Retention times:  $t_R$  9.2 min and  $t_R$  12.2 min.

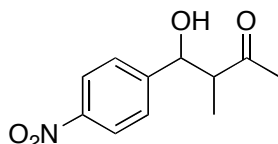

**4-Hydroxy-3-methyl-4-(4-nitrophenyl)-butan-2-one (12):** (*anti* isomer)  $^1\text{H}$  NMR (400 MHz, toluene- $d_8$ )  $\delta$  0.69 (d,  $J = 7.1$  Hz, 3H), 1.91 (s, 3H), 2.46-2.54 (m, 1H), 2.87 (d,  $J = 4.1$  Hz, 1H), 4.53 (dd,  $J = 8.3$  Hz, 3.1 Hz, 1H), 7.05 (d,  $J = 8.4$  Hz, 2H), 7.97 (d,  $J = 8.9$  Hz, 2H); Chiral HPLC data: Daicel Chiralpak IA, 5% *i*-PrOH/hexane, UV 254 nm, Flow rate 1.0 mL/min, Retention times:  $t_R$  50.6 min and  $t_R$  55.9 min; (*syn* isomer)  $^1\text{H}$  NMR (400 MHz, toluene- $d_8$ )  $\delta$  0.84 (d,  $J = 7.1$  Hz, 3H), 1.82 (s, 3H), 2.18 (d,  $J = 3.4$  Hz, 1H), 3.21 (d,  $J = 2.5$  Hz, 1H), 4.93 (d,  $J = 2.7$  Hz, 1H), 7.05 (d,  $J = 9.1$  Hz, 2H), 7.97 (d,  $J = 8.9$  Hz, 2H); Chiral HPLC data: Daicel Chiralpak IA, 5% *i*-PrOH/hexane, UV 254 nm, Flow rate 1.0 mL/min, Retention times:  $t_R$  27.6 min and  $t_R$  43.4 min.

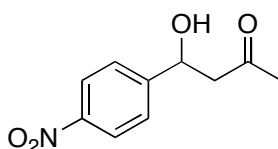

**1-Hydroxy-1-(4-nitrophenyl)-pentan-3-one (13):**  $^1\text{H}$  NMR (400 MHz, toluene- $d_8$ )  $\delta$  1.00 (t,  $J = 7.4$  Hz, 3H), 2.00 (q,  $J = 7.5$  Hz, 2H), 2.22-2.25 (m, 2H), 3.46 (s, 1H), 4.95 (d,  $J = 9.3$  Hz, 1H), 7.14 (d,  $J = 8.6$  Hz, 2H), 8.01 (d,  $J = 9.1$  Hz, 2H); Chiral HPLC data: Daicel Chiralpak AS-H, 30% *i*-PrOH/hexane, UV 254 nm, Flow rate 1.0 mL/min, Retention times:  $t_R$  9.8 min and  $t_R$  16.3 min.

### F. Reaction Schemes:

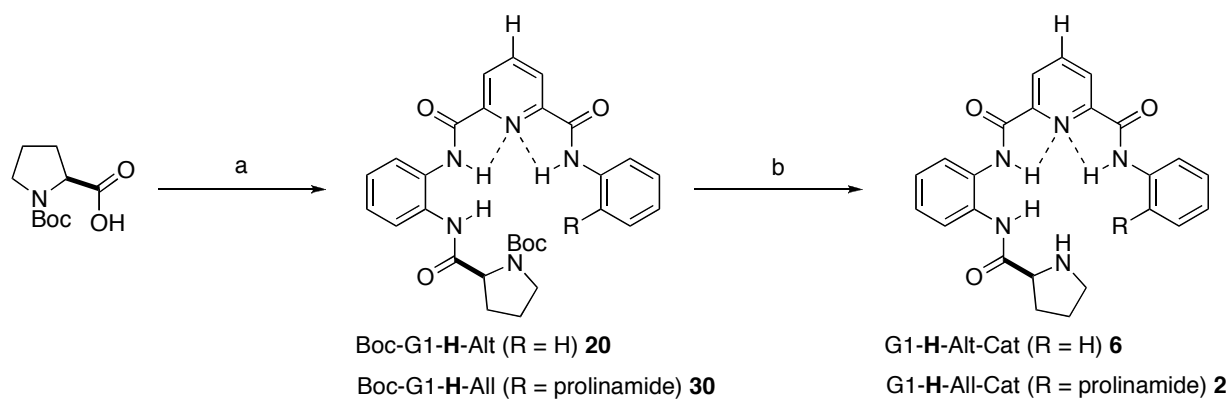

**Scheme 1:** Synthesis of Boc-G1-H-(Alt/All) (a) 1) Ethyl chloroformate,  $\text{Et}_3\text{N}$ , THF,  $0^\circ\text{C}$ ; 2) *o*-phenylenediamine, THF,  $-20^\circ\text{C}$ ; 3) aniline (for R = H); 4) 2,6-pyridinedicarbonyl dichloride,  $\text{Et}_3\text{N}$ ,  $\text{CH}_2\text{Cl}_2$ ,  $0^\circ\text{C}$ , 48% for **20**, 81% for **30**; (b) TFA, anisole,  $\text{CH}_2\text{Cl}_2$ , quant.

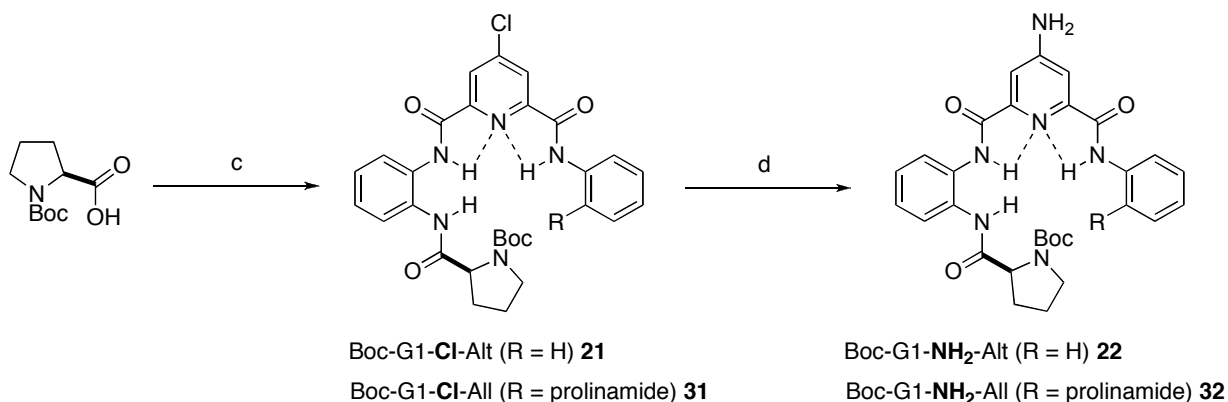

**Scheme 2:** Synthesis of Boc-G1-NH<sub>2</sub>-(Alt/All) (c) 1) Ethyl chloroformate, Et<sub>3</sub>N, THF, 0°C; 2) *o*-phenylenediamine, THF, -20°C; 3) aniline (for R = H); 4) 4-chloro-2,6-pyridinedicarbonyl dichloride, Et<sub>3</sub>N, CH<sub>2</sub>Cl<sub>2</sub>, 0°C, 59% for **21**, 89% for **31**; (d) 1) NaN<sub>3</sub>, DMF, 50°C; 2) Pd/C, H<sub>2</sub>, EtOH, 78% for **22**, 88% for **32** (2 steps).

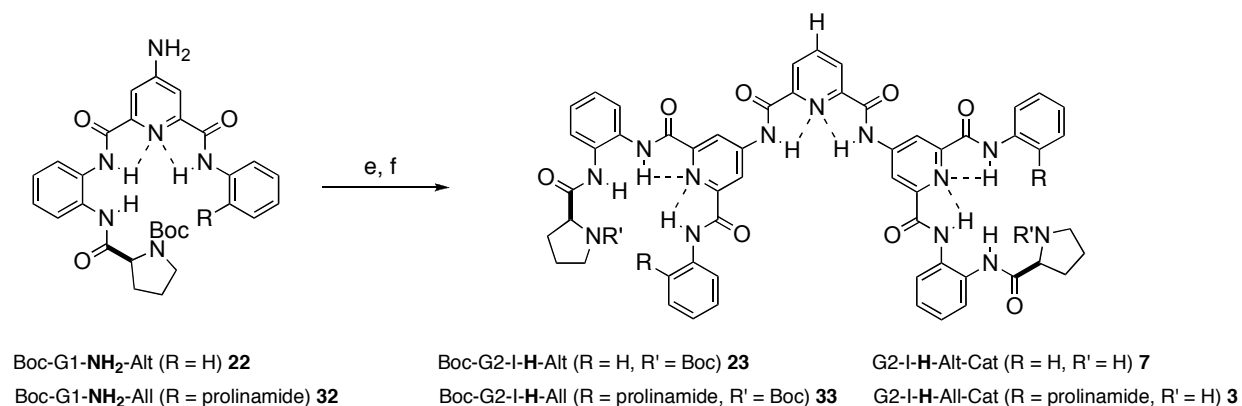

**Scheme 3:** Synthesis of G2-I-H-(Alt/All)-Cat (e) 2,6-pyridinedicarbonyl dichloride, pyridine, DMAP, CH<sub>2</sub>Cl<sub>2</sub>, 0°C, 86% for **23**, 84% for **33**; (f) **23** or **33**, TFA, anisole, CH<sub>2</sub>Cl<sub>2</sub>, quant.

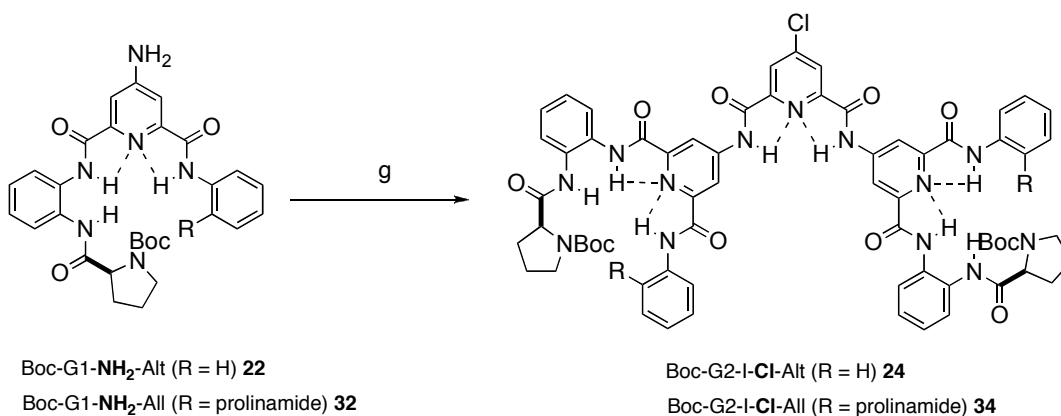

**Scheme 4:** Synthesis of Boc-G2-I-Cl-(Alt/All) (g) 4-chloro-2,6-pyridinedicarbonyl dichloride, pyridine, DMAP, CH<sub>2</sub>Cl<sub>2</sub>, 0°C, 91% for **24**, 75% for **34**.

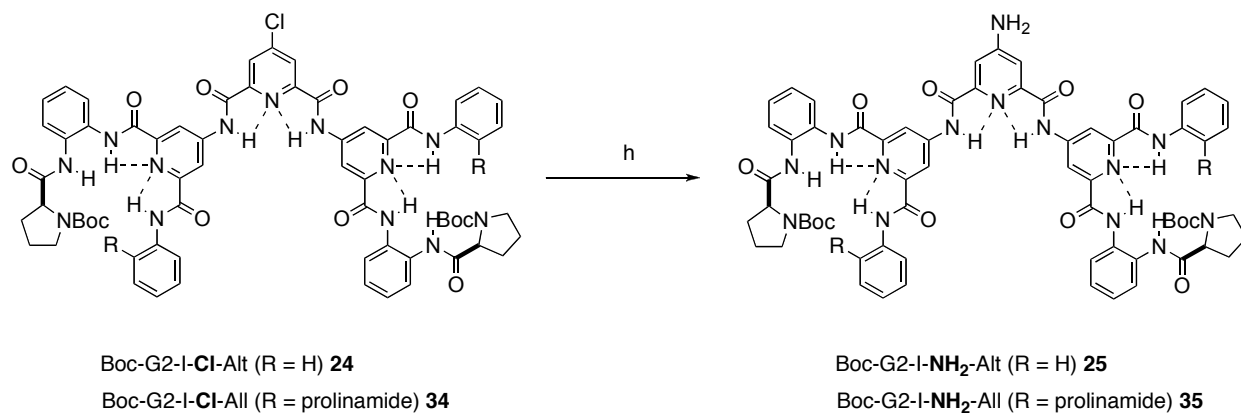

**Scheme 5:** Synthesis of Boc-G2-I-NH<sub>2</sub>-(Alt/All) (h) 1) NaN<sub>3</sub>, DMF, 50°C; 2) Pd/C, H<sub>2</sub>, EtOH, 27% for **25**, 67% for **35** (2 steps).

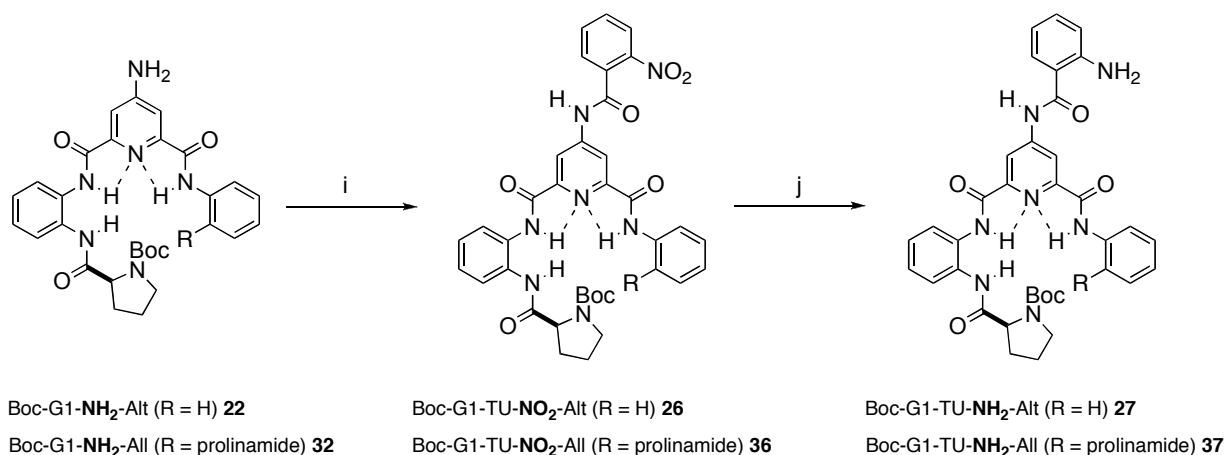

**Scheme 6:** Synthesis of Boc-G1-TU-NH<sub>2</sub>-(Alt/All) (i) 2-nitrobenzoylchloride, pyridine, DMAP, CH<sub>2</sub>Cl<sub>2</sub>, 0°C, 48% for **36**; (j) Pd/C, H<sub>2</sub>, EtOH, 93% for **27** (2 steps), 85% for **37**.

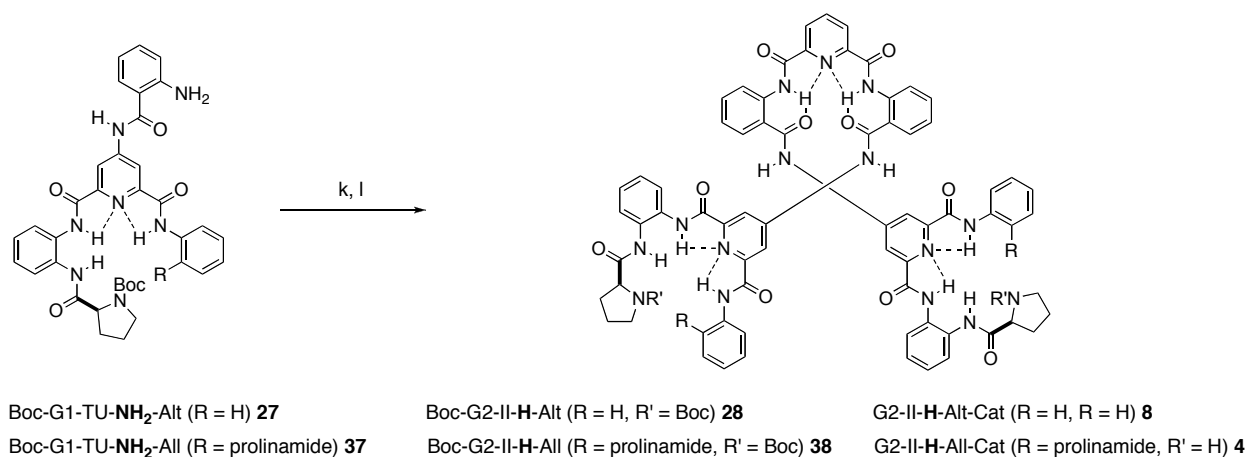

**Scheme 7:** Synthesis of Boc-G2-II-H-(Alt/All) (k) 2,6-pyridinedicarbonyl dichloride, pyridine, DMAP, CH<sub>2</sub>Cl<sub>2</sub>, 0°C, 74% for **28**, 56% for **38**; (l) **28** or **38**, TFA, anisole, CH<sub>2</sub>Cl<sub>2</sub>, quant.

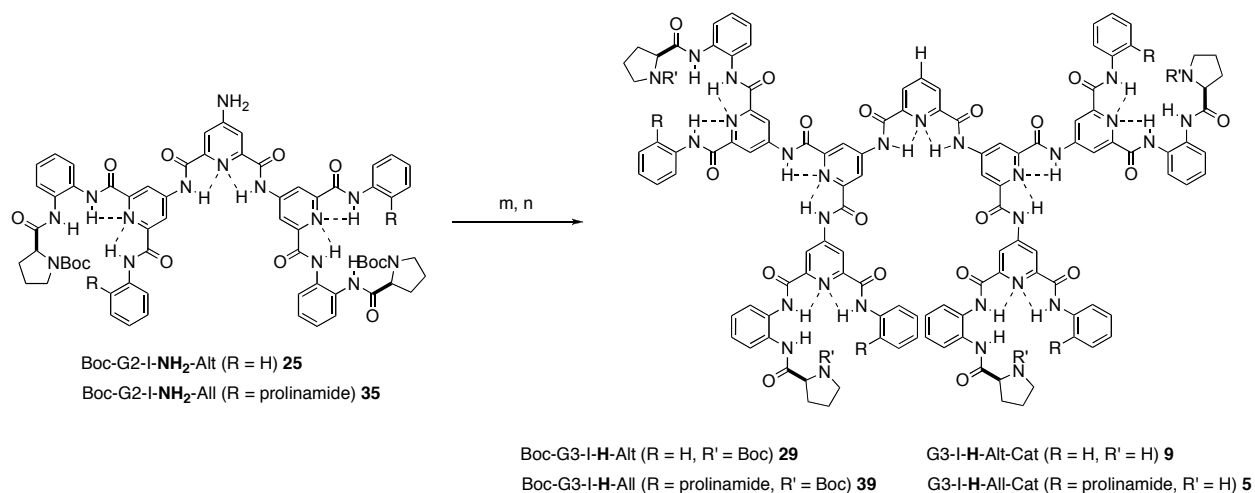

**Scheme 8:** Synthesis of Boc-G3-I-H-(Alt/All) (m) 2,6-pyridinedicarbonyl dichloride, pyridine, DMAP, CH<sub>2</sub>Cl<sub>2</sub>, 0°C, 29% for **29**, 69% for **39**; (n) **29** or **39**, TFA, anisole, CH<sub>2</sub>Cl<sub>2</sub>, quant.

## G. Experimental procedures for the synthesis of compounds 1-41:

Cbz-(S)-*N*-phenylpyrrolidine-2-carboxamide and (S)-*N*-phenylpyrrolidine-2-carboxamide (**1**) were prepared by the procedure of Gong et al.<sup>2</sup>

**Boc-G1-H-Alt (20):** To a solution of Boc-Pro-OH (2.15 g, 10.0 mmol) in anhydrous THF (50 mL) was added Et<sub>3</sub>N (2.79 mL, 20.0 mmol) at room temperature under N<sub>2</sub> atmosphere. The reaction mixture was stirred for 30 min and cooled to 0°C. Ethyl chloroformate (0.956 mL, 10.0 mmol) was added to the reaction mixture dropwise and the reaction was stirred and warmed to rt over 3 h. The reaction was cooled to -20°C, and then *o*-phenylenediamine (973 mg, 9.0 mmol) in anhydrous THF (4.5 mL) was added to the reaction mixture quickly. The resulting mixture was stirred while warming to rt gradually over 12 h. After the complete consumption of diamine starting material (~12 h), the reaction was cooled to 0°C. Aniline (0.5 mL, 5.5 mmol) and an additional amount of Et<sub>3</sub>N (4.18 mL, 30.0 mmol) were added. To this reaction mixture, was added a solution of 2,6-pyridinedicarbonyl dichloride (2.04 g, 10.0 mmol) in CH<sub>2</sub>Cl<sub>2</sub> (10 mL)

dropwise over 5 min. The resulting reaction mixture was stirred while warming to rt over 12 h. The solvent was removed *in vacuo*. The residue was redissolved in CHCl<sub>3</sub> (50 mL) and washed with cold 1M HCl (30 mL). The aqueous layer was back-extracted with CHCl<sub>3</sub> (2 x 20 mL). The combined organics were treated with solid NaHCO<sub>3</sub> until pH ~7, dried over Na<sub>2</sub>SO<sub>4</sub> and concentrated *in vacuo*. The residue was purified by column chromatography on silica gel (0%-50% EtOAc/ether) to give Boc-G1-H-Alt (**20**) (2.3 g, 4.34 mmol, 48% based on diamine) as a white solid. mp 130-135 °C (CHCl<sub>3</sub>); <sup>1</sup>H NMR (400 MHz, 80°C, DMSO-*d*<sub>6</sub>) δ 1.21 (s, 9H), 1.59-1.72 (m, 2H), 1.84-1.92 (m, 1H), 2.04-2.11 (m, 1H), 3.00-3.07 (m, 1H), 3.13-3.19 (m, 1H), 4.25 (dd, *J* = 8.6 Hz, 5.0 Hz, 1H), 7.17 (t, *J* = 7.2 Hz, 1H), 7.28-7.33 (m, 2H), 7.40 (t, *J* = 7.9 Hz, 2H), 7.49 (d, *J* = 7.1 Hz, 1H), 7.81 (d, *J* = 7.7 Hz, 1H), 7.93 (d, *J* = 8.6 Hz, 2H), 8.29 (t, *J* = 7.3 Hz, 1H), 8.38-8.43 (m, 2H), 9.85 (s, 1H), 10.62 (s, 1H), 11.03 (s, 1H); <sup>13</sup>C NMR (100 MHz, DMSO-*d*<sub>6</sub>) δ 23.0, 27.5, 30.1, 46.1, 60.2, 78.3, 120.4, 123.8, 124.2, 124.5, 124.7, 125.19, 125.21, 125.3, 128.2, 130.2, 130.5, 137.7, 139.6, 148.3, 148.4, 152.93, 160.9, 161.0, 172.3; IR (KBr) 3450, 3308, 2976, 1684, 1601, 1533, 1449, 1390, 1305, 1233, 1162 cm<sup>-1</sup>. HRMS calcd for C<sub>29</sub>H<sub>31</sub>N<sub>5</sub>O<sub>5</sub> (M+Na) 552.2223, found 552.2213.

**G1-Alt-Cat (6):** To a solution of Boc-G1-H-Alt (**20**) (1.69 g, 3.19 mmol) in CH<sub>2</sub>Cl<sub>2</sub> (4.9 mL) was added anisole (1.7 mL, 16.0 mmol) at rt. The mixture was cooled to 0°C and TFA (4.9 mL, 63.8 mmol) was added dropwise over 5 min. The reaction was stirred while warming to rt gradually over 12 h. The volatiles were removed *in vacuo*. To the residue was added diethyl ether (15 mL) and the solid precipitate was isolated by filtration. The precipitate was redissolved in CHCl<sub>3</sub> (30 mL), washed with saturated aqueous NaHCO<sub>3</sub> (20 mL), dried over Na<sub>2</sub>SO<sub>4</sub> and concentrated *in vacuo* to give G1-Alt-Cat (**6**) (1.35 mg, 3.14 mmol, 99%) as a white solid. mp

170-172 °C (CHCl<sub>3</sub>); <sup>1</sup>H NMR (400 MHz, 80°C, DMSO-*d*<sub>6</sub>) δ 1.45-1.55 (m, 2H), 1.70-1.78 (m, 1H), 1.86-1.95 (m, 1H), 2.62-2.68 (m, 1H), 2.71-2.77 (m, 1H), 2.96 (brs, 1H), 3.72 (dd, *J* = 9.0 Hz, 5.3 Hz, 1H), 7.19 (t, *J* = 7.4 Hz, 1H), 7.26-7.34 (m, 2H), 7.43 (t, *J* = 8.6 Hz, 2H), 7.70 (dd, *J* = 7.7 Hz, 2.5 Hz, 1H), 7.77 (dd, *J* = 7.2 Hz, 2.0 Hz, 1H), 7.93 (dd, *J* = 8.8 Hz, 1.0 Hz, 2H), 8.32 (t, *J* = 7.9 Hz, 1H), 8.40 (dd, *J* = 7.8 Hz, 1.3 Hz, 1H), 8.44 (dd, *J* = 7.6 Hz, 1.3 Hz, 1H), 10.14 (s, 1H), 10.72 (s, 1H), 11.05 (s, 1H); <sup>13</sup>C NMR (100 MHz, DMSO-*d*<sub>6</sub>) δ 25.2, 30.0, 46.1, 60.4, 120.7, 122.8, 124.0, 124.4, 124.6, 124.7, 125.8, 126.0, 128.2, 128.9, 131.6, 137.6, 139.5, 148.3, 148.5, 161.1, 161.3, 174.2; IR (KBr) 3237, 3058, 2960, 2861, 1692, 1670, 1643, 1598, 1504, 1446, 1324, 1300, 1222, 1138, 1105, 1070 cm<sup>-1</sup>; HRMS calcd for C<sub>24</sub>H<sub>23</sub>N<sub>5</sub>O<sub>3</sub> (M+Na) 452.1699, found 452.1694.

**Boc-G1-Cl-Alt (21):** To a solution of Boc-Pro-OH (1.57 g, 8.07 mmol) in anhydrous THF (80 mL) was added Et<sub>3</sub>N (1.69 mL, 12.1 mmol) at room temperature under N<sub>2</sub> atmosphere. The reaction mixture was stirred for 30 min and cooled to 0°C. Ethyl chloroformate (0.772 mL, 8.07 mmol) was added to the reaction mixture dropwise and the reaction was stirred and warmed to rt over 3 h. After the reaction was cooled to -20°C, and then *o*-phenylenediamine (786 mg, 7.27 mmol) in anhydrous THF (7.3 mL) was added to the reaction mixture quickly. The resulting mixture was stirred while warming to rt gradually over 12 h. After the complete consumption of diamine starting material (~12 h), the reaction was cooled to 0°C. Aniline (0.589 mL, 6.46 mmol) and an additional amount of Et<sub>3</sub>N (3.37 mL, 24.2 mmol) were added. To this reaction mixture, was added a solution of 4-chloro-2,6-pyridinedicarbonyl dichloride (1.77 g, 7.27 mmol) in CH<sub>2</sub>Cl<sub>2</sub> (7.3 mL) dropwise over 5 min. The resulting reaction mixture was stirred while warming to rt over 12 h. The solvent was removed *in vacuo*. The residue was redissolved in



CHCl<sub>3</sub> (50 mL) and washed with cold 1M HCl (30 mL). The aqueous layer was back-extracted with CHCl<sub>3</sub> (2 x 20 mL). The combined organics were treated with solid NaHCO<sub>3</sub> until pH ~7, dried over Na<sub>2</sub>SO<sub>4</sub> and concentrated *in vacuo*. The residue was purified by column chromatography on silica gel (0%-50% EtOAc/ether) to give Boc-G1-H-Alt (**21**) (2.13 g, 3.78 mmol, 59% based on aniline) as a white solid. mp 135-140 °C (CHCl<sub>3</sub>); <sup>1</sup>H NMR (400 MHz, 80°C, DMSO-*d*<sub>6</sub>) δ 1.22 (s, 9H), 1.61-1.73 (m, 2H), 1.87-1.94 (m, 1H), 2.04-2.12 (m, 1H), 3.03-3.07 (m, 1H), 3.14-3.19 (m, 1H), 4.25 (dd, *J* = 9.0 Hz, 4.9 Hz, 1H), 7.19 (t, *J* = 7.5 Hz, 1H), 7.31-7.34 (m, 2H), 7.41 (t, *J* = 7.9 Hz, 2H), 7.52 (d, *J* = 5.8 Hz, 1H), 7.78 (d, *J* = 8.2 Hz, 1H), 7.91 (d, *J* = 8.2 Hz, 2H), 8.36 (d, *J* = 1.9 Hz, 1H), 8.39 (d, *J* = 2.0 Hz, 1H), 9.82 (s, 1H), 10.63 (s, 1H), 11.05 (s, 1H); <sup>13</sup>C NMR (100 MHz, DMSO-*d*<sub>6</sub>) δ 23.1, 27.6, 30.2, 46.1, 60.2, 78.4, 120.4, 124.1, 124.2, 124.3, 124.4, 125.2, 125.5, 128.2, 129.8, 130.6, 137.4, 146.5, 150.0, 150.2, 153.0, 159.8, 159.9, 172.3; IR (KBr) 3461, 3236, 3076, 2969, 2861, 1687, 1602, 1539, 1481, 1441, 1392, 1361, 1325, 1231, 1159, 1123, 1083 cm<sup>-1</sup>; HRMS calcd for C<sub>29</sub>H<sub>30</sub>ClN<sub>5</sub>O<sub>5</sub> (M+Na) 586.1833, found 586.1841.

**Boc-G1-NH<sub>2</sub>-Alt (22):** Boc-G1-Cl-Alt (**21**) (656 mg, 1.16 mmol) was dissolved in anhydrous DMF (5.8 mL). To this solution was added NaN<sub>3</sub> (754 mg, 11.6 mmol). After stirring at 50°C for 48 h, the solvent was removed under reduced pressure. The residue was redissolved in water (40 mL) and CHCl<sub>3</sub> (20 mL). The organic layer was extracted and washed with brine (20 mL) and dried over Na<sub>2</sub>SO<sub>4</sub>. After concentration *in vacuo*, the residue was redissolved in anhydrous EtOH (6 mL). 10% Pd/C (66 mg) was added to this mixture and the reaction was hydrogenated under H<sub>2</sub> at atmospheric pressure for 12 h. The catalyst was removed by filtration through a pad of celite. The solvent was removed *in vacuo* and the residue was purified by column

chromatography on silica gel (0-30% EtOAc/ether) to give Boc-G1-NH<sub>2</sub>-Alt (**22**) (495 mg, 0.91 mmol, 78% over 2 steps) as an off-white solid. mp 152-155 °C (CHCl<sub>3</sub>); <sup>1</sup>H NMR (400 MHz, 80°C, DMSO-*d*<sub>6</sub>) δ 1.26 (s, 9H), 1.59-1.73 (m, 2H), 1.82-1.90 (m, 1H), 2.03-2.12 (m, 1H), 3.03-3.07 (m, 1H), 3.13-3.19 (m, 1H), 4.24 (dd, *J* = 9.0 Hz, 5.0 Hz, 1H), 6.63 (s, 2H), 7.13 (t, *J* = 7.0 Hz, 1H), 7.24-7.33 (m, 2H), 7.36 (t, *J* = 7.8 Hz, 2H), 7.41-7.45 (m, 1H), 7.52 (dd, *J* = 7.9 Hz, 2.5 Hz, 1H), 7.78 (d, *J* = 8.0 Hz, 2H), 7.93 (d, *J* = 7.8 Hz, 1H), 9.83 (s, 1H), 10.50 (s, 1H), 10.85 (s, 1H); <sup>13</sup>C NMR (100 MHz, DMSO-*d*<sub>6</sub>) δ 23.0, 27.5, 30.2, 46.1, 60.2, 78.4, 108.6, 108.7, 120.1, 123.4, 124.3, 124.9, 125.1, 125.2, 128.1, 130.2, 130.7, 138.0, 148.8, 149.0, 153.0, 157.0, 161.8, 161.9, 172.3; IR (KBr) 3443, 3345, 3058, 2978, 2879, 2360, 1688, 1594, 1537, 1454, 1392, 1368, 1317, 1233, 1160, 1120 cm<sup>-1</sup>; HRMS calcd for C<sub>29</sub>H<sub>32</sub>N<sub>6</sub>O<sub>5</sub> (M+Na) 567.2332, found 567.2327.

**Boc-G2-I-H-Alt (23):** To a solution of Boc-G1-NH<sub>2</sub>-Alt (**22**) (735 mg, 1.35 mmol) in dry CH<sub>2</sub>Cl<sub>2</sub> (20 mL) were added DMAP (50 mg, 0.41 mmol) and pyridine (10 mL). The reaction mixture was cooled to 0°C in an ice bath. To this mixture was added a solution of 2,6-pyridinedicarbonyl dichloride (138 mg, 0.68 mmol) in CH<sub>2</sub>Cl<sub>2</sub> (0.7 mL) dropwise over 5 min. The reaction was stirred while warming to rt gradually over 12 h. The reaction was diluted with CH<sub>2</sub>Cl<sub>2</sub> (20 mL) and washed with cold 1 M HCl (30 mL). The aqueous layer was back-extracted with CHCl<sub>3</sub> (2 x 20 mL). The organic layer was treated with solid NaHCO<sub>3</sub> until pH ~7 and dried over Na<sub>2</sub>SO<sub>4</sub>. After concentration *in vacuo*, the residue was purified by column chromatography on silica gel (1-5% MeOH/CHCl<sub>3</sub>) to afford Boc-G2-I-H-Alt (**23**) (705 mg, 0.578 mmol, 86%) as an off-white solid. mp (dec) 230 °C (CHCl<sub>3</sub>); <sup>1</sup>H NMR (400 MHz, 80°C, DMSO-*d*<sub>6</sub>) δ 1.24 (s, 18H), 1.59-1.77 (m, 4H), 1.88-1.96 (m, 2H), 2.06-2.15 (m, 2H), 3.04-3.10 (m, 2H), 3.15-3.21

(m, 2H), 4.28 (dd,  $J = 8.5$  Hz,  $5.3$  Hz, 2H), 7.17 (t,  $J = 7.6$  Hz, 2H), 7.27-7.36 (m, 4H), 7.40 (t,  $J = 8.1$  Hz, 4H), 7.50 (d,  $J = 6.8$  Hz, 2H), 7.86 (d,  $J = 8.0$  Hz, 2H), 7.98 (d,  $J = 7.8$  Hz, 4H), 8.39 (dd,  $J = 9.3$  Hz,  $7.3$  Hz, 1H), 8.53 (d,  $J = 7.5$  Hz, 2H), 9.09 (d,  $J = 2.2$  Hz, 2H), 9.10 (d,  $J = 2.1$  Hz, 2H), 9.90 (s, 2H), 10.69 (s, 2H), 11.16 (s, 2H), 11.61 (s, 2H);  $^{13}\text{C}$  NMR (100 MHz, DMSO- $d_6$ )  $\delta$  23.0, 27.4, 30.1, 46.3, 60.2, 78.3, 114.8, 120.4, 123.8, 124.2, 125.1, 125.9, 128.1, 130.2, 130.4, 137.6, 139.6, 147.8, 148.1, 149.6, 149.7, 153.0, 160.9, 161.0, 162.5, 172.2; IR (KBr) 3471, 3308, 3076, 2964, 2912, 2870, 1700, 1678, 1593, 1533, 1481, 1443, 1386, 1361, 1305, 1220, 1159, 1125  $\text{cm}^{-1}$ ; MALDI-TOF MS calcd for  $\text{C}_{65}\text{H}_{65}\text{N}_{13}\text{O}_{12}$  (M+Na) 1242.477, found 1242.433.

**G2-I-Alt-Cat (7):** To a solution of Boc-G2-I-H-Alt (**23**) (705 mg, 0.578 mmol) in  $\text{CH}_2\text{Cl}_2$  (2.6 mL) was added anisole (0.63 mL, 5.7 mmol) at rt. The mixture was cooled to  $0^\circ\text{C}$  and TFA (2.60 mL, 23.1 mmol) was added dropwise over 5 min. The reaction was stirred while warming to rt gradually over 12 h. The volatiles were removed *in vacuo*. To the residue was added diethyl ether (10 mL) and the solid precipitate was isolated by filtration. The precipitate was redissolved in a mixture of  $\text{H}_2\text{O}$  (5 mL) and  $\text{CH}_3\text{CN}$  (5 mL). To this mixture was added solid  $\text{NaHCO}_3$  with stirring until pH  $\sim 8$ . The white solid precipitate was isolated by filtration and dried *in vacuo* over  $\text{P}_2\text{O}_5$  to give G2-I-H-Alt-Cat (**7**) (580 mg, 0.569 mmol, 98%) as a white solid. mp 263-267  $^\circ\text{C}$  ( $\text{CHCl}_3$ );  $^1\text{H}$  NMR (400 MHz,  $80^\circ\text{C}$ , DMSO- $d_6$ )  $\delta$  1.68-1.75 (m, 4H), 2.04-2.13 (m, 2H), 2.19-2.28 (m, 2H), 3.07-3.17 (m, 4H), 4.35 (dd,  $J = 8.8$  Hz,  $6.6$  Hz, 2H), 7.22 (t,  $J = 7.5$  Hz, 2H), 7.34-7.38 (m, 4H), 7.46 (t,  $J = 8.2$  Hz, 4H), 7.73-7.75 (m, 2H), 7.77-7.80 (m, 2H), 7.90 (dd,  $J = 8.8$  Hz,  $1.1$  Hz, 4H), 8.42 (dd,  $J = 8.9$  Hz,  $7.3$  Hz, 1H), 8.55 (d,  $J = 7.9$  Hz, 2H), 9.07 (d,  $J = 2.0$  Hz, 2H), 9.09 (d,  $J = 2.1$  Hz, 2H), 10.08 (s, 2H), 10.79 (s, 2H), 10.82 (s, 2H), 11.64 (s, 2H);

$^{13}\text{C}$  NMR (100 MHz, DMSO- $d_6$ )  $\delta$  23.3, 29.3, 45.5, 59.5, 115.0, 115.1, 121.2, 124.1, 124.5, 125.3, 125.8, 126.1, 126.3, 128.3, 130.0, 131.1, 137.6, 139.9, 147.9, 148.0, 150.1, 161.4, 161.6, 162.7, 168.1; IR (KBr) 3445, 3282, 3076, 2921, 2354, 1675, 1589, 1529, 1442, 1314, 1202, 1134  $\text{cm}^{-1}$ ; MALDI-TOF MS calcd for  $\text{C}_{55}\text{H}_{49}\text{N}_{13}\text{O}_8$  (M+Na) 1042.372, found 1042.473.

**Boc-G2-I-Cl-Alt (24):** To a solution of Boc-G1-NH<sub>2</sub>-Alt (**22**) (545 mg, 1.00 mmol) in dry CH<sub>2</sub>Cl<sub>2</sub> (10 mL) were added DMAP (37 mg, 0.30 mmol) and pyridine (3 mL). The reaction mixture was cooled to 0°C in an ice bath. To this mixture was added a solution of 4-chloro-2,6-pyridinedicarbonyl dichloride (102 mg, 0.50 mmol) in CH<sub>2</sub>Cl<sub>2</sub> (0.5 mL) dropwise over 5 min. The reaction was stirred while warming to rt gradually over 12 h. The reaction was diluted with CH<sub>2</sub>Cl<sub>2</sub> (10 mL) and washed with cold 1 M HCl (10 mL). The aqueous layer was back-extracted with CHCl<sub>3</sub> (2 x 10 mL). The combined organic layer was treated with solid NaHCO<sub>3</sub> until pH ~7 and dried over Na<sub>2</sub>SO<sub>4</sub>. After concentration *in vacuo*, the residue was purified by column chromatography on silica gel (1-5% MeOH/CHCl<sub>3</sub>) to afford Boc-G2-I-Cl-Alt (**24**) (568 mg, 0.453 mmol, 91%) as an off-white solid. mp (dec) 235 °C (CHCl<sub>3</sub>);  $^1\text{H}$  NMR (400 MHz, 80°C, DMSO- $d_6$ )  $\delta$  1.23 (s, 18H), 1.60-1.75 (m, 4H), 1.87-1.95 (m, 2H), 2.05-2.12 (m, 2H), 3.03-3.20 (m, 4H), 4.27 (dd,  $J = 8.6$  Hz, 4.9 Hz, 2H), 7.18 (t,  $J = 8.2$  Hz, 2H), 7.28-7.36 (m, 4H), 7.41 (t,  $J = 8.2$  Hz, 4H), 7.49 (d,  $J = 6.6$  Hz, 2H), 7.85 (d,  $J = 7.9$  Hz, 2H), 7.97 (d,  $J = 8.3$  Hz, 4H), 8.50 (s, 2H), 9.05 (d,  $J = 1.5$  Hz, 2H), 9.06 (d,  $J = 1.9$  Hz, 2H), 9.89 (s, 2H), 10.68 (s, 2H), 11.11 (s, 2H), 11.61 (s, 2H);  $^{13}\text{C}$  NMR (100 MHz, DMSO- $d_6$ )  $\delta$  23.1, 27.5, 28.5, 46.1, 60.2, 78.4, 114.84, 114.86, 120.4, 123.9, 124.3, 125.25, 125.28, 125.8, 128.2, 130.2, 130.5, 137.6, 139.6, 146.6, 148.0, 149.4, 149.7, 149.8, 153.0, 160.9, 161.0, 161.5, 172.4; IR (KBr) 3461, 3308, 3085, 2969, 2915, 1598, 1585, 1504, 1441, 1392, 1307, 1239, 1159, 1119  $\text{cm}^{-1}$ ; MALDI-TOF MS calcd for

$C_{65}H_{64}ClN_{13}O_{12}$  (M+Na) 1276.438, found 1276.343.

**Boc-G2-I-NH<sub>2</sub>-Alt (25):** Boc-G2-Cl-Alt (**24**) (542 mg, 0.433 mmol) was dissolved in anhydrous DMF (4.3 mL). To this solution was added NaN<sub>3</sub> (281 mg, 4.33 mmol). After stirring at 50 °C for 48 h, the solvent was removed under reduced pressure. The residue was redissolved in water (40 mL) and CHCl<sub>3</sub> (20 mL). The organic layer was extracted and washed with brine (20 mL) and dried over Na<sub>2</sub>SO<sub>4</sub>. After concentration *in vacuo*, the residue was redissolved in anhydrous EtOH (4.3 mL). 10% Pd/C (54 mg) was added to this mixture and the reaction was hydrogenated under H<sub>2</sub> at atmospheric pressure for 12 h. The catalyst was removed by filtration through a pad of celite. The solvent was removed *in vacuo* and the residue was purified by column chromatography on silica gel (5-10% MeOH/CHCl<sub>3</sub> to give Boc-G2-NH<sub>2</sub>-Alt (**25**) (136 mg, 0.110 mmol, 27% over 2 steps) as an off-white solid. mp (dec) 240 °C (CHCl<sub>3</sub>); <sup>1</sup>H NMR (400 MHz, 80 °C, DMSO-*d*<sub>6</sub>) δ 1.24 (s, 18H), 1.61-1.76 (m, 4H), 1.88-1.95 (m, 2H), 2.06-2.13 (m, 2H), 3.04-3.20 (m, 4H), 4.27 (dd, *J* = 8.7 Hz, 5.0 Hz, 2H), 6.83 (s, 2H), 7.19 (t, *J* = 7.4 Hz, 2H), 7.29-7.37 (m, 4H), 7.41 (t, *J* = 7.7 Hz, 4H), 7.50 (d, *J* = 6.9 Hz, 2H), 7.67 (s, 2H), 7.86 (d, *J* = 7.4 Hz, 2H), 7.98 (d, *J* = 8.2 Hz, 4H), 9.04 (d, *J* = 2.0 Hz, 2H), 9.05 (d, *J* = 2.3 Hz, 2H), 9.89 (s, 2H), 10.70 (s, 2H), 11.08 (s, 2H), 11.48 (s, 2H); <sup>13</sup>C NMR (100 MHz, DMSO-*d*<sub>6</sub>) δ 23.0, 27.5, 28.5, 46.1, 60.2, 78.4, 110.0, 114.8, 120.4, 123.9, 124.3, 125.26, 125.29, 128.2, 130.3, 130.5, 137.7, 148.3, 148.4, 149.6, 149.7, 153.0, 157.0, 161.0, 161.1, 163.5, 172.3; IR (KBr) 3461, 3345, 2978, 2924, 2360, 1670, 1602, 1567, 1522, 1446, 1401, 1159, 1119 cm<sup>-1</sup>; MALDI-TOF MS calcd for C<sub>65</sub>H<sub>66</sub>N<sub>14</sub>O<sub>12</sub> (M+Na) 1257.488, found 1257.556.

**Boc-II-G1-NO<sub>2</sub>-Alt (26):** To a solution of Boc-G1-NH<sub>2</sub>-Alt (**22**) (297 mg, 0.545 mmol) in dry

CH<sub>2</sub>Cl<sub>2</sub> (5.5 mL) were added DMAP (15 mg, 0.123 mmol) and pyridine (2.8 mL). The reaction mixture was cooled to 0°C in an ice bath. To this mixture was added a solution of 2-nitrobenzoyl chloride (102 mg, 0.55 mmol) in CH<sub>2</sub>Cl<sub>2</sub> (0.5 mL) dropwise over 5 min. The reaction was stirred while warming to rt gradually over 12 h. The reaction was diluted with CH<sub>2</sub>Cl<sub>2</sub> (10 mL) and washed with cold 1 M HCl (10 mL). The aqueous layer was back-extracted with CHCl<sub>3</sub> (2 x 10 mL). The combined organic layer was treated with solid NaHCO<sub>3</sub> until pH ~7 and dried over Na<sub>2</sub>SO<sub>4</sub>. After concentration *in vacuo*, the crude residue was directly used in the next step. A small amount of the crude material was purified by preparative TLC on silica gel (5% MeOH/CHCl<sub>3</sub>) to afford analytically pure Boc-II-G1-NO<sub>2</sub>-Alt (**26**) as an off-white solid. mp (dec) 180 °C (CHCl<sub>3</sub>); <sup>1</sup>H NMR (400 MHz, 80°C, DMSO-*d*<sub>6</sub>) δ 1.27 (s, 9H), 1.61-1.75 (m, 2H), 1.87-1.95 (m, 1H), 2.06-2.15 (m, 1H), 3.01-3.11 (m, 1H), 3.16-3.22 (m, 1H), 4.27 (dd, *J* = 8.5 Hz, 5.0 Hz, 1H), 7.18 (t, *J* = 7.0 Hz, 1H), 7.27-7.37 (m, 2H), 7.41 (t, *J* = 7.9 Hz, 2H), 7.50 (d, *J* = 7.5 Hz, 1H), 7.81-7.88 (m, 3H), 7.94 (t, *J* = 8.1 Hz, 3H), 8.21 (d, *J* = 8.1 Hz, 1H), 8.67 (d, *J* = 2.2 Hz, 1H), 8.69 (d, *J* = 2.1 Hz, 1H), 9.83 (s, 1H), 10.62 (s, 1H), 11.02 (s, 1H), 11.33 (s, 1H); <sup>13</sup>C NMR (100 MHz, DMSO-*d*<sub>6</sub>) δ 23.0, 27.5, 30.2, 46.1, 60.2, 78.4, 114.0, 120.3, 123.8, 123.9, 124.3, 125.21, 125.24, 125.3, 128.2, 128.8, 130.22, 130.24, 130.5, 131.1, 131.2, 133.8, 137.7, 146.0, 148.5, 149.7, 149.8, 153.0, 160.8, 160.9, 164.9, 172.3; IR (KBr) 3470, 3318, 3237, 3085, 2978, 2924, 1710, 1674, 1589, 1522, 1477, 1441, 1392, 1347, 1293, 1249, 1159, 1123, 1070 cm<sup>-1</sup>; HRMS calcd for C<sub>36</sub>H<sub>35</sub>N<sub>7</sub>O<sub>8</sub> (M+Na) 716.2445, found 716.2439.

**Boc-II-G1-NH<sub>2</sub>-Alt (27):** Crude Boc-II-G1-NO<sub>2</sub>-Alt (**26**) (442 mg, 0.545 mmol) was dissolved in anhydrous EtOH (5.5 mL). 10% Pd/C (44 mg) was added to this mixture and the reaction was hydrogenated under H<sub>2</sub> at atmospheric pressure for 12 h. The catalyst was removed by filtration

through a pad of celite. The solvent was removed *in vacuo* and the residue was purified by column chromatography on silica gel (10-15% THF/CHCl<sub>3</sub> to give Boc-II-G1-NH<sub>2</sub>-Alt (**27**) (336 mg, 0.506 mmol, 93% over 2 steps) as an off-white solid. mp (dec) 190 °C (CHCl<sub>3</sub>); <sup>1</sup>H NMR (400 MHz, 80°C, DMSO-*d*<sub>6</sub>) δ 1.26 (s, 9H), 1.61-1.76 (m, 2H), 1.86-1.94 (m, 1H), 2.05-2.15 (m, 1H), 3.06-3.12 (m, 1H), 3.16-3.22 (m, 1H), 4.27 (dd, *J* = 8.5 Hz, 5.0 Hz, 1H), 6.41 (s, 2H), 6.63-6.67 (m, 1H), 6.84 (dd, *J* = 8.4 Hz, 1.1 Hz, 1H), 7.17-7.20 (m, 1H), 7.25-7.37 (m, 3H), 7.38-7.43 (m, 2H), 7.49 (d, *J* = 7.5 Hz, 1H), 7.80 (dd, *J* = 8.1 Hz, 1.6 Hz, 1H), 7.82 (d, *J* = 7.8 Hz, 1H), 7.96 (dd, *J* = 8.8 Hz, 1.0 Hz, 2H), 8.82 (d, *J* = 2.1 Hz, 1H), 8.84 (d, *J* = 2.0 Hz, 1H), 9.83 (s, 1H), 10.61 (s, 1H), 11.01 (s, 1H); <sup>13</sup>C NMR (100 MHz, DMSO-*d*<sub>6</sub>) δ 23.0, 27.5, 28.5, 46.1, 60.2, 78.4, 110.0, 114.8, 120.4, 123.9, 124.3, 125.19, 125.24, 128.2, 130.3, 130.5, 137.7, 148.3, 148.4, 149.6, 149.7, 153.0, 157.0, 161.0, 161.1, 163.5, 172.3; IR (KBr) 3461, 3318, 3076, 2978, 2933, 1674, 1584, 1522, 1446, 1396, 1293, 1235, 1159, 1114 cm<sup>-1</sup>; HRMS calcd for C<sub>36</sub>H<sub>37</sub>N<sub>7</sub>O<sub>6</sub> (M+Na) 686.2703, found 686.2705.

**Boc-G2-II-H-Alt (28):** To a solution of Boc-II-G1-NH<sub>2</sub>-Alt (**27**) (272 mg, 0.410 mmol) in dry CH<sub>2</sub>Cl<sub>2</sub> (4.1 mL) were added DMAP (10 mg, 0.082 mmol) and pyridine (1.6 mL). The reaction mixture was cooled to 0°C in an ice bath. To this mixture was added a solution of 2,6-pyridinedicarbonyl dichloride (44 mg, 0.21 mmol) in CH<sub>2</sub>Cl<sub>2</sub> (0.2 mL) dropwise over 5 min. The reaction was stirred while warming to rt gradually over 12 h. The reaction was diluted with CH<sub>2</sub>Cl<sub>2</sub> (10 mL) and washed with cold 1 M HCl (10 mL). The aqueous layer was back-extracted with CHCl<sub>3</sub> (2 x 10 mL). The organic layer was treated with solid NaHCO<sub>3</sub> until pH ~7 and dried over Na<sub>2</sub>SO<sub>4</sub>. After concentration *in vacuo*, the residue was purified by column chromatography on silica gel (10-25% THF/CHCl<sub>3</sub>) to afford Boc-G2-II-H-Alt (**28**) (220 mg, 0.151 mmol, 74%)

as an off-white solid. mp (dec) 230 °C (CHCl<sub>3</sub>); <sup>1</sup>H NMR (400 MHz, 80°C, DMSO-*d*<sub>6</sub>) δ 1.24 (s, 18H), 1.58-1.73 (m, 4H), 1.84-1.92 (m, 2H), 2.02-2.11 (m, 2H), 3.00-3.09 (m, 2H), 3.12-3.19 (m, 2H), 4.25 (dd, *J* = 8.6 Hz, 5.0 Hz, 2H), 7.14 (t, *J* = 7.5 Hz, 2H), 7.19 (t, *J* = 7.2 Hz, 2H), 7.30 (td, *J* = 7.8 Hz, 1.6 Hz, 2H), 7.37 (td, *J* = 7.8 Hz, 1.7 Hz, 2H), 7.40-7.82 (m, 8H), 7.76 (d, *J* = 8.1 Hz, 2H). 7.84 (d, *J* = 8.3 Hz, 2H), 7.94 (d, *J* = 7.9 Hz, 4H), 8.34 (dd, *J* = 9.3 Hz, 6.4 Hz, 1H), 8.40-8.43 (m, 4H), 8.50 (d, *J* = 2.1 Hz, 2H), 8.58 (d, *J* = 2.0 Hz, 2H), 9.85 (s, 2H), 10.44 (s, 2H), 10.77 (s, 2H), 10.88 (s, 2H), 12.14 (s, 2H); <sup>13</sup>C NMR (100 MHz, DMSO-*d*<sub>6</sub>) δ 23.0, 27.5, 30.4, 46.1, 60.2, 78.3, 114.5, 114.6, 120.2, 121.7, 122.8, 123.1, 123.6, 124.4, 124.7, 125.0, 125.1, 125.3, 128.1, 128.5, 130.1, 130.5, 131.8, 137.1, 137.8, 139.9, 148.5, 148.6, 149.0, 149.2, 153.0, 160.7, 161.0, 166.8, 172.4; IR (KBr) 3452, 3318, 2978, 2924, 1710, 1674, 1589, 1531, 1443, 1396, 1302, 1240, 1164, 1123, 1083 cm<sup>-1</sup>; MALDI-TOF MS calcd for C<sub>79</sub>H<sub>75</sub>N<sub>15</sub>O<sub>14</sub> (M+Na) 1480.551, found 1480.549.

**G2-II-H-Alt-Cat (8):** To a solution of Boc-G2-II-H-Alt (**28**) (400 mg, 0.274 mmol) in CHCl<sub>3</sub> (5 mL) and THF (5 mL) was added anisole (106 μL, 0.979 mmol) at rt. The mixture was cooled to 0°C and TFA (1.06 mL, 13.7 mmol) was added dropwise over 5 min. The reaction was stirred while warming to rt gradually over 12 h. The volatiles were removed *in vacuo*. To the residue was added diethyl ether (15 mL) and the solid precipitate was isolated by filtration. The precipitate was redissolved in a mixture of H<sub>2</sub>O (3 mL) and CH<sub>3</sub>CN (3 mL). To this mixture was added solid NaHCO<sub>3</sub> with stirring until pH ~8. The white solid precipitate was isolated by filtration and dried *in vacuo* over P<sub>2</sub>O<sub>5</sub> to give G2-II-H-Alt-Cat (**8**) (166 mg, 0.270 mmol, 99%) as a white solid. mp 245-250 °C (CHCl<sub>3</sub>); <sup>1</sup>H NMR (400 MHz, 80°C, DMSO-*d*<sub>6</sub>) δ 1.63-1.78 (m, 4H), 2.05-2.14 (m, 2H), 2.27-2.37 (m, 2H), 3.09-3.23 (m, 4H), 4.46 (t, *J* = 7.6 Hz, 5.0 Hz, 2H),



7.18-7.23 (m, 4H), 7.31-7.39 (m, 4H), 7.43-7.50 (m, 6H) 7.69 (dd,  $J = 7.9$  Hz, 1.8 Hz, 2H), 7.81 (td,  $J = 7.6$  Hz, 1.2 Hz, 4H), 7.97 (dd,  $J = 8.7$  Hz, 1.1 Hz, 4H), 8.35 (dd,  $J = 9.0$  Hz, 6.7 Hz, 1H), 8.41-8.44 (m, 4H), 8.53 (d,  $J = 2.1$  Hz, 2H), 8.62 (d,  $J = 2.1$  Hz, 2H), 9.13 (brs, 2H), 10.58 (s, 2H), 10.79 (s, 4H), 10.84 (s, 2H), 12.19 (s, 2H);  $^{13}\text{C}$  NMR (100 MHz, DMSO- $d_6$ )  $\delta$  23.0, 27.5, 30.2, 46.1, 60.2, 78.4, 114.0, 120.3, 123.8, 123.9, 124.3, 125.2, 125.3, 128.2, 128.8, 130.2, 130.5, 131.1, 131.2, 133.8, 137.7, 146.0, 148.5, 149.7, 149.8, 153.0, 160.8, 160.9, 164.9, 172.3; IR (KBr) 3443, 3255, 3031, 2951, 1674, 1589, 1535, 1446, 1400, 1352, 1307, 1226, 1199, 1132, 1079  $\text{cm}^{-1}$ ; MALDI-TOF MS calcd for  $\text{C}_{69}\text{H}_{59}\text{N}_{15}\text{O}_{10}$  (M+Na) 1280.446, found 1280.468

**Boc-G3-I-H-Alt (29):** To a solution of Boc-G2-NH<sub>2</sub>-Alt (**25**) (438 mg, 0.355 mmol) in dry CH<sub>2</sub>Cl<sub>2</sub> (3.6 mL) were added DMAP (4 mg, 0.036 mmol) and pyridine (1.8 mL). The reaction mixture was cooled to 0°C in an ice bath. To this mixture was added a solution of 2,6-pyridinedicarbonyl dichloride (36.9 mg, 0.178 mmol) in CH<sub>2</sub>Cl<sub>2</sub> (0.2 mL) dropwise over 5 min. The reaction was stirred while warming to rt gradually over 12 h. The reaction was diluted with CH<sub>2</sub>Cl<sub>2</sub> (5 mL) and washed with cold 1 M HCl. The aqueous layer was back-extracted with CHCl<sub>3</sub> (2 x 10 mL). The combined organic layer was treated with solid NaHCO<sub>3</sub> until pH ~7 and dried over Na<sub>2</sub>SO<sub>4</sub>. After concentration *in vacuo*, the residue was purified by column chromatography on silica gel (1-5% MeOH/CHCl<sub>3</sub>) to afford Boc-G3-I-H-Alt (**29**) (134 mg, 0.0515 mmol, 29%) as an off-white solid. mp (dec) 240 °C (CHCl<sub>3</sub>);  $^1\text{H}$  NMR (400 MHz, 80°C, DMSO- $d_6$ )  $\delta$  1.25 (s, 36H), 1.61-1.76 (m, 8H), 1.88-1.96 (m, 4H), 2.05-2.14 (m, 4H), 3.07-3.12 (m, 4H), 3.15-3.21 (m, 4H), 4.27 (dd,  $J = 9.1$  Hz, 4.9 Hz, 4H), 7.17 (t,  $J = 7.7$  Hz, 4H), 7.28-7.35 (m, 8H), 7.40 (t,  $J = 7.9$  Hz, 8H), 7.50 (d,  $J = 6.9$  Hz, 4H), 7.86 (d,  $J = 7.3$  Hz, 4H), 7.98 (d,  $J = 9.2$  Hz, 8H), 8.44 (t,  $J = 7.4$  Hz, 1H), 8.57 (d,  $J = 7.9$  Hz, 2H), 9.09 (dd,  $J = 13.0$  Hz, 2.3

Hz, 8H), 9.18 (s, 4H), 9.85 (s, 4H), 10.68 (s, 4H), 11.09 (s, 4H), 11.65 (s, 2H), 11.67 (s, 4H);  $^{13}\text{C}$  NMR (100 MHz, DMSO- $d_6$ )  $\delta$  22.7, 27.2, 29.9, 45.8, 60.0, 78.1, 114.7, 116.0, 120.1, 123.5, 124.0, 124.88, 124.91, 125.7, 127.8, 130.04, 130.11, 130.12, 130.17, 137.4, 147.6, 147.9, 148.0, 148.9, 149.4, 149.5, 152.72, 152.74, 152.76, 160.7, 160.8, 162.3, 162.4, 170.0; IR (KBr) 3460, 3308, 3066, 2977, 2914, 2842, 1678, 1584, 1526, 1441, 1405, 1342, 1306, 1226, 1159, 1122  $\text{cm}^{-1}$ ; MALDI-TOF MS calcd for  $\text{C}_{137}\text{H}_{133}\text{N}_{29}\text{O}_{26}$  (M+Na) 2622.987, found 2623.025.

**G3-I-Alt-Cat (9):** To a solution of Boc-G3-I-H-Alt (**29**) (100 mg, 0.0384 mmol) in  $\text{CH}_2\text{Cl}_2$  (0.75 mL) was added anisole (83  $\mu\text{L}$ , 0.77 mmol) at rt. The mixture was cooled to  $0^\circ\text{C}$  and TFA (237  $\mu\text{L}$ , 3.07 mmol) was added dropwise over 5 min. The reaction was stirred while warming to rt gradually over 12 h. The volatiles were removed *in vacuo*. To the residue was added diethyl ether (5 mL) and the solid precipitate was isolated by filtration. The precipitate was redissolved in a mixture of  $\text{H}_2\text{O}$  (1 mL) and  $\text{CH}_3\text{CN}$  (1 mL). To this mixture was added solid  $\text{NaHCO}_3$  with stirring until pH  $\sim$ 8. The white solid precipitate was isolated by filtration and dried *in vacuo* over  $\text{P}_2\text{O}_5$  to give G3-I-Alt-Cat (**9**) (84 mg, 0.382 mmol, 99%) as a white solid. mp (dec)  $290^\circ\text{C}$  ( $\text{CHCl}_3$ );  $^1\text{H}$  NMR (400 MHz,  $80^\circ\text{C}$ , DMSO- $d_6$ )  $\delta$  1.67-1.75 (m, 8H), 2.04-2.12 (m, 4H), 2.18-2.27 (m, 4H), 3.06-3.16 (m, 8H), 4.33 (dd,  $J = 7.4$  Hz, 7.0 Hz, 4H), 7.22 (t,  $J = 7.6$  Hz, 4H), 7.34-7.38 (m, 8H), 7.45 (t,  $J = 8.0$  Hz, 8H), 7.71-7.78 (m, 8H), 7.89 (d,  $J = 8.4$  Hz, 8H), 8.42 (t,  $J = 8.6$  Hz, 1H), 8.55 (d,  $J = 8.2$  Hz, 2H), 9.10 (s, 8H), 9.18 (s, 4H), 10.04 (brs, 4H), 10.78 (s, 4H), 10.81 (s, 4H), 11.67 (s, 2H), 11.69 (s, 4H);  $^{13}\text{C}$  NMR (100 MHz, DMSO- $d_6$ )  $\delta$  23.1, 29.1, 45.5, 59.5, 115.0, 115.1, 116.3, 121.0, 124.0, 124.5, 125.3, 125.6, 126.0, 128.1, 130.1, 130.9, 137.5, 147.9, 148.0, 148.3, 149.2, 149.8, 150.1, 161.4, 161.5, 162.6, 162.8, 167.83, 167.86, 167.88; IR (KBr) 3443, 3237, 3022, 2960, 1678, 1576, 1517, 1447, 1411, 1348, 1317, 1222,

1133, 1000  $\text{cm}^{-1}$ ; MALDI-TOF MS calcd for  $\text{C}_{117}\text{H}_{101}\text{N}_{29}\text{O}_{18}$  ( $\text{M}+\text{Na}$ ) 2222.777, found 2222.823.

**Boc-G1-H-All (30):** To a solution of Boc-Pro-OH (2.15 g, 10.0 mmol) in anhydrous THF (50 mL) was added  $\text{Et}_3\text{N}$  (2.79 mL, 20.0 mmol) at room temperature under  $\text{N}_2$  atmosphere. The reaction mixture was stirred for 30 min and cooled to  $0^\circ\text{C}$ . Ethyl chloroformate (0.956 mL, 10.0 mmol) was added to the reaction mixture dropwise and the reaction was stirred and warmed to rt over 3 h. The reaction was cooled to  $-20^\circ\text{C}$ , and then *o*-phenylenediamine (973 mg, 9.0 mmol) in anhydrous THF (4.5 mL) was added to the reaction mixture quickly. The resulting mixture was stirred while warming to rt gradually over 12 h. After the complete consumption of diamine starting material ( $\sim 12$  h), the reaction was cooled to  $0^\circ\text{C}$ . An additional amount of  $\text{Et}_3\text{N}$  (4.18 mL, 30.0 mmol) was added. To this reaction mixture, was added a solution of 2,6-pyridinedicarbonyl dichloride (1.02 g, 5.0 mmol) in  $\text{CH}_2\text{Cl}_2$  (5 mL) dropwise over 5 min. The resulting reaction mixture was stirred while warming to rt over 12 h. The solvent was removed *in vacuo*. The residue was redissolved in  $\text{CHCl}_3$  (50 mL) and washed with cold 1M HCl (30 mL). The aqueous layer was back-extracted with  $\text{CHCl}_3$  (2 x 20 mL). The combined organics were treated with solid  $\text{NaHCO}_3$  until pH  $\sim 7$ , dried over  $\text{Na}_2\text{SO}_4$  and concentrated *in vacuo*. The residue was purified by column chromatography on silica gel (0%-50% EtOAc/ether) to give Boc-G1-H-All (**30**) (5.41 g, 7.29 mmol, 81% based on diamine) as a white solid. mp  $155\text{-}158^\circ\text{C}$  ( $\text{CHCl}_3$ );  $^1\text{H}$  NMR (400 MHz,  $80^\circ\text{C}$ ,  $\text{DMSO}-d_6$ )  $\delta$  1.23 (s, 18H), 1.53-1.70 (m, 4H), 1.82-1.90 (m, 2H), 1.97-2.06 (m, 2H), 3.09-3.22 (m, 4H), 4.18 (dd,  $J = 8.5$  Hz, 4.4 Hz, 2H), 7.28-7.33 (m, 4H), 7.63-7.65 (m, 2H), 7.81-7.83 (m, 2H), 8.34 (dd,  $J = 8.7$  Hz, 6.9 Hz, 1H), 8.43 (d,  $J = 7.5$  Hz, 2H), 9.5 (s, 2H), 10.88 (s, 2H).  $^{13}\text{C}$  NMR (100 MHz,  $\text{DMSO}-d_6$ )  $\delta$  23.0, 27.5, 30.1, 46.1,

60.3, 78.3, 124.3, 124.7, 124.8, 124.9, 125.3, 129.7, 130.6, 130.5, 139.6, 148.2, 153.1, 161.2, 171.6; IR (KBr) 3478, 3263, 3075, 2967, 2914, 2870, 2350, 1691, 1602, 1526, 1491, 1450, 1391, 1360, 1306, 1253, 1159, 1118, 1003  $\text{cm}^{-1}$ . HRMS calcd for  $\text{C}_{39}\text{H}_{47}\text{N}_7\text{O}_8$  (M+Na) 764.3384, found 764.3380.

**G1-All-Cat (2):** To a solution of Boc-G1-All-H (**30**) (3.7 g, 5.0 mmol) in  $\text{CH}_2\text{Cl}_2$  (20 mL) was added anisole (2.7 mL, 25 mmol) at rt. The mixture was cooled to  $0^\circ\text{C}$  and TFA (7.43 mL, 100 mmol) was added dropwise over 5 min. The reaction was stirred while warming to rt gradually over 12 h. The volatiles were removed *in vacuo*. To the residue was added diethyl ether (25 mL) and the solid precipitate was isolated by filtration. The precipitate was redissolved in  $\text{CHCl}_3$  (100 mL), washed with saturated aqueous  $\text{NaHCO}_3$  (50 mL), dried over  $\text{Na}_2\text{SO}_4$  and concentrated *in vacuo* to give G1-All-Cat (**2**) (2.6 g, 4.8 mmol, 96%) as a white solid. mp 115-118  $^\circ\text{C}$  ( $\text{CHCl}_3$ );  $^1\text{H}$  NMR (400 MHz,  $80^\circ\text{C}$ ,  $\text{DMSO}-d_6$ )  $\delta$  1.46-1.53 (m, 4H), 1.67-1.74 (m, 2H), 1.83-1.92 (m, 2H), 2.57-2.62 (m, 2H), 2.70-2.75 (m, 2H), 2.99 (brs, 2H), 3.64 (dd,  $J = 8.9$  Hz, 5.3 Hz, 2H), 7.21-7.33 (m, 4H), 7.63-7.60 (dd,  $J = 7.8$  Hz, 1.4 Hz, 2H), 7.9 (dd,  $J = 8.0$  Hz, 1.4 Hz, 2H), 8.34 (dd,  $J = 8.6$  Hz, 6.8 Hz, 1H), 8.42 (d,  $J = 7.2$  Hz, 2H), 10.04 (brs, 2H), 10.93 (brs, 2H);  $^{13}\text{C}$  NMR (100 MHz,  $\text{DMSO}-d_6$ )  $\delta$  25.1, 29.7, 45.9, 60.4, 69.4, 122.2, 123.8, 124.4, 126.0, 128.1, 132.4, 139.5, 148.1, 161.5, 173.4; IR (KBr) 3464, 3346, 3256, 2959, 2869, 2356, 1682, 1592, 1516, 1480, 1300, 1226, 1135, 1106  $\text{cm}^{-1}$ ; HRMS calcd for  $\text{C}_{29}\text{H}_{31}\text{N}_7\text{O}_4$  (M+Na) 564.2332, found 564.2335.

**Boc-G1-CI-All (31):** To a solution of Boc-Pro-OH (2.15g, 10.0 mmol) in anhydrous THF (50 mL) was added  $\text{Et}_3\text{N}$  (2.79 mL, 20.0 mmol) at room temperature under  $\text{N}_2$  atmosphere. The

reaction mixture was stirred for 30 min and cooled to 0°C. Ethyl chloroformate (0.956 mL, 10.0 mmol) was added to the reaction mixture dropwise and the reaction was stirred and warmed to rt over 3 h. The reaction was cooled to -20°C, and then *o*-phenylenediamine (973 mg, 9.0 mmol) in anhydrous THF (4.5 mL) was added to the reaction mixture quickly. The resulting mixture was stirred while warming to rt gradually over 12 h. After the complete consumption of diamine starting material (~12 h), the reaction was cooled to 0°C. An additional amount of Et<sub>3</sub>N (4.18 mL, 30.0 mmol) was added. To this reaction mixture, was added a solution of 4-chloro-2,6-pyridinedicarbonyl dichloride (1.02 g, 5.0 mmol) in CH<sub>2</sub>Cl<sub>2</sub> (5 mL) dropwise over 5 min. The resulting reaction mixture was stirred while warming to rt over 12 hr. The solvent was removed *in vacuo*. The residue was redissolved in CHCl<sub>3</sub> (50 mL) and washed with cold 1M HCl (30 mL). The aqueous layer was back-extracted with CHCl<sub>3</sub> (2 x 20 mL). The combined organics were treated with solid NaHCO<sub>3</sub> until pH ~7, dried over Na<sub>2</sub>SO<sub>4</sub> and concentrated *in vacuo*. The residue was purified by column chromatography on silica gel (0%-50% EtOAc/ether) to give Boc-G1-Cl-All (**31**) (6.21 g, 8.0 mmol, 89% based on diamine) as a white solid. mp 174-178 °C (CHCl<sub>3</sub>); <sup>1</sup>H NMR (400 MHz, 80°C, DMSO-*d*<sub>6</sub>) δ 1.23 (s, 18H), 1.57-1.71 (m, 4H), 1.84-1.92 (m, 2H), 1.98-2.06 (m, 2H), 3.09-3.23 (m, 4H), 4.19 (dd, *J* = 8.4 Hz, 4.4 Hz, 2H), 7.29-7.34 (m, 4H), 7.64-7.66 (m, 2H), 7.76-7.79 (m, 2H), 8.41 (s, 2H), 9.51 (s, 2H), 10.88 (s, 2H); <sup>13</sup>C NMR (100 MHz, DMSO-*d*<sub>6</sub>) δ 23.0, 27.5, 30.1, 46.1, 60.2, 78.4, 78.7, 124.3, 124.4, 124.9, 125.6, 129.3, 130.8, 146.6, 149.9, 153.1, 160.1, 171.5; IR (KBr) 3492, 3241, 3068, 2973, 2921, 2869, 2349, 1690, 1600, 1534, 1482, 1452, 1395, 1317, 1255, 1162, 1118, 1010 cm<sup>-1</sup>; HRMS calcd for C<sub>39</sub>H<sub>46</sub>ClN<sub>7</sub>O<sub>8</sub> (M+Na) 798.2994, found 798.2996.

**Boc-G1-NH<sub>2</sub>-All (32):** Boc-G1-Cl-All (**31**) (1.88 g, 2.42 mmol) was dissolved in anhydrous DMF (16.7 mL). To this solution was added NaN<sub>3</sub> (2.17 g, 33.3 mmol). After stirring at 50°C for 48 h, the solvent was removed under reduced pressure. The residue was redissolved in water (50 mL) and CHCl<sub>3</sub> (30 mL). The organic layer was extracted and washed with brine (20 mL) and dried over Na<sub>2</sub>SO<sub>4</sub>. After concentration *in vacuo*, the residue was redissolved in anhydrous EtOH. 10% Pd/C (189 mg) was added to this mixture and the reaction was hydrogenated under H<sub>2</sub> at atmospheric pressure for 12 h. The catalyst was removed by filtration through a pad of celite. The solvent was removed *in vacuo* and the residue was purified by column chromatography on silica gel (1-5% MeOH/CHCl<sub>3</sub> to give Boc-G1-NH<sub>2</sub>-All (**32**) (1.61 g, 2.13 mmol, 88% over 2 steps) as an off-white solid. mp 176-180 °C (CHCl<sub>3</sub>); <sup>1</sup>H NMR (400 MHz, 80°C, DMSO-*d*<sub>6</sub>) δ 1.24 (s, 18H), 1.53-1.70 (m, 4H), 1.77-1.85 (m, 2H), 1.94-2.00 (m, 2H), 3.09-3.19 (m, 4H), 4.19 (dd, *J* = 8.6 Hz, 4.5 Hz, 2H), 6.65 (s, 2H), 7.23-7.30 (m, 4H), 7.53 (s, 2H), 7.55-7.58 (m, 2H), 7.78-7.80 (m, 2H), 9.53 (s, 2H), 10.70 (s, 2H); <sup>13</sup>C NMR (100 MHz, DMSO-*d*<sub>6</sub>) δ 22.9, 27.5, 30.0, 46.0, 60.2, 78.4, 108.7, 124.4, 124.89, 124.92, 130.14, 130.18, 148.6, 153.0, 157.1, 162.1, 171.6; IR (KBr) 3449, 3353, 3250, 2973, 2921, 2869, 2358, 1695, 1603, 1520, 1482, 1447, 1395, 1365, 1300, 1257, 1162, 1123 cm<sup>-1</sup>; HRMS calcd for C<sub>39</sub>H<sub>48</sub>N<sub>8</sub>O<sub>8</sub> (M+Na) 779.3487, found 779.3459.

**Boc-G2-H-All (33):** To a solution of Boc-G1-NH<sub>2</sub>-All (**32**) (456 mg, 0.602 mmol) in dry CH<sub>2</sub>Cl<sub>2</sub> (3 mL) were added DMAP (15 mg, 0.12 mmol) and pyridine (3 mL). The reaction mixture was cooled to 0°C in an ice bath. To this mixture was added a solution of 2,6-pyridinedicarbonyl dichloride (61 mg, 0.30 mmol) in CH<sub>2</sub>Cl<sub>2</sub> (0.3 mL) dropwise over 5 min. The reaction was stirred while warming to rt gradually over 12 h. The reaction was diluted with CH<sub>2</sub>Cl<sub>2</sub> (10 mL) and

washed with cold 1 M HCl (10 mL). The aqueous layer was back-extracted with CHCl<sub>3</sub> (2 x 10 mL). The combined organic layer was treated with solid NaHCO<sub>3</sub> until pH ~7 and dried over Na<sub>2</sub>SO<sub>4</sub>. After concentration *in vacuo*, the residue was purified by column chromatography on silica gel (10-20% MeOH/ether) to afford Boc-G2-I-H-All (**33**) (414 mg, 0.252 mmol, 84%) as an off-white solid. mp (dec) 210 °C (CHCl<sub>3</sub>); <sup>1</sup>H NMR (400 MHz, 80°C, DMSO-*d*<sub>6</sub>) δ 1.22 (s, 36H), 1.54-1.65 (m, 8H), 1.80-1.88 (m, 4H), 1.95-2.02 (m, 4H), 3.10-3.17 (m, 8H), 4.16 (dd, *J* = 8.6 Hz, 4.6 Hz, 4H), 7.27-7.34 (m, 8H), 7.59-7.61 (m, 4H), 7.83-7.85 (m, 4H), 8.42 (t, *J* = 7.7 Hz, 1H), 8.56 (d, *J* = 7.9 Hz, 2H), 9.07 (s, 4H), 9.58 (s, 4H), 10.89 (s, 4H); <sup>13</sup>C NMR (100 MHz, DMSO-*d*<sub>6</sub>) δ 22.9, 27.4, 30.0, 46.0, 60.1, 78.2, 114.9, 124.3, 124.75, 124.84, 125.1, 126.0, 129.8, 130.5, 139.7, 147.8, 148.2, 149.5, 153.0, 161.2, 162.7, 171.5; IR (KBr) 3469, 3299, 3075, 2977, 2923, 2889, 1674, 1602, 1575, 1521, 1477, 1445, 1396, 1360, 1311, 1257, 1163, 1127 cm<sup>-1</sup>; HRMS calcd for C<sub>85</sub>H<sub>97</sub>N<sub>17</sub>O<sub>18</sub> (M+Na) 1666.7090, found 1666.7125.

**G2-I-All-Cat (3):** To a solution of Boc-G2-I-H-All (**33**) (100 mg, 0.061 mmol) in CH<sub>2</sub>Cl<sub>2</sub> (0.61 mL) was added anisole (61 μL, 0.56 mmol) at rt. The mixture was cooled to 0°C and TFA (0.61 mL, 7.9 mmol) was added dropwise over 5 min. The reaction was stirred while warming to rt gradually over 12 h. The volatiles were removed *in vacuo*. To the residue was added diethyl ether (5 mL) and the solid precipitate was isolated by filtration. The precipitate was redissolved in a mixture of H<sub>2</sub>O (1 mL) and CH<sub>3</sub>CN (1 mL). To this mixture was added solid NaHCO<sub>3</sub> with stirring until pH ~8. The white solid precipitate was isolated by filtration and dried *in vacuo* over P<sub>2</sub>O<sub>5</sub> to give G2-I-H-All-Cat (**3**) (73 mg, 0.059 mmol, 96%) as a white solid. mp (dec) 215 °C (CHCl<sub>3</sub>); <sup>1</sup>H NMR (400 MHz, 80°C, DMSO-*d*<sub>6</sub>) δ 1.66-1.83 (m, 8H), 1.99-2.07 (m, 4H), 2.20-2.29 (m, 4H), 3.12 (t, *J* = 7.5 Hz, 8H), 3.74 (brs, 4H), 4.39 (dd, *J* = 9.2 Hz, 7.0 Hz, 4H),

7.32-7.38 (m, 8H), 7.62-7.65 (m, 4H), 7.68-7.73 (m, 4H), 8.42 (dd,  $J = 8.9$  Hz, 7.1 Hz, 1H), 8.56 (d,  $J = 7.7$  Hz, 2H), 9.03 (s, 4H), 9.89 (brs, 4H), 10.66 (s, 4H), 11.63 (s, 2H);  $^{13}\text{C}$  NMR (100 MHz, DMSO- $d_6$ )  $\delta$  22.8, 28.9, 45.2, 59.3, 114.9, 124.7, 125.5, 125.7, 130.0, 130.8, 147.8, 148.0, 149.7, 161.6, 162.7, 167.0; IR (KBr) 3475, 3296, 3081, 2982, 2785, 2355, 1663, 1596, 1569, 1524, 1448, 1412, 1309, 1202, 1134  $\text{cm}^{-1}$ ; HRMS calcd for  $\text{C}_{65}\text{H}_{65}\text{N}_{17}\text{O}_{10}$  (M+Na) 1266.4993, found 1266.4965.

**Boc-G2-I-Cl-All (34):** To a solution of Boc-G1-NH<sub>2</sub>-All (**32**) (550 mg, 0.727 mmol) in dry CH<sub>2</sub>Cl<sub>2</sub> (3.6 mL) were added DMAP (9 mg, 0.07 mmol) and pyridine (1.8 mL). The reaction mixture was cooled to 0°C in an ice bath. To this mixture was added a solution of 4-chloro-2,6-pyridinedicarbonyl dichloride (87 mg, 0.36 mmol) in CH<sub>2</sub>Cl<sub>2</sub> (0.4 mL) dropwise over 5 min. The reaction was stirred while warming to rt gradually over 12 h. The reaction was diluted with CH<sub>2</sub>Cl<sub>2</sub> (10 mL) and washed with cold 1 M HCl (10 mL). The aqueous layer was back-extracted with CHCl<sub>3</sub> (2 x 10 mL). The combined organic layer was treated with solid NaHCO<sub>3</sub> until pH ~7 and dried over Na<sub>2</sub>SO<sub>4</sub>. After concentration *in vacuo*, the residue was purified by column chromatography on silica gel (1-2% MeOH/CHCl<sub>3</sub>) to afford Boc-G2-I-Cl-All (**34**) (458 mg, 0.273 mmol, 75%) as an off-white solid. mp 170-174 °C (CHCl<sub>3</sub>);  $^1\text{H}$  NMR (400 MHz, 80°C, DMSO- $d_6$ )  $\delta$  1.23 (s, 36H), 1.54-1.68 (m, 8H), 1.82-1.89 (m, 4H), 1.96-2.03 (m, 4H), 3.08-3.20 (m, 8H), 4.17 (dd,  $J = 8.5$  Hz, 4.5 Hz, 4H), 7.27-7.35 (m, 8H), 7.60-7.62 (m, 4H), 7.84-7.86 (m, 4H), 8.53 (s, 2H), 9.06 (s, 4H), 9.58 (s, 4H), 10.90 (s, 4H);  $^{13}\text{C}$  NMR (100 MHz, DMSO- $d_6$ )  $\delta$  23.0, 27.5, 30.8, 46.1, 60.2, 78.3, 114.9, 124.4, 124.8, 125.0, 125.3, 125.9, 129.8, 130.5, 146.6, 148.1, 149.5, 149.6, 153.1, 161.2, 161.6, 171.6; IR (KBr) 3483, 3276, 3068, 2977, 2931, 2351, 1673, 1599, 1519, 1480, 1455, 1393, 1368, 1217, 1181, 1126  $\text{cm}^{-1}$ ; MALDI-TOF MS calcd for



$C_{85}H_{96}ClN_{17}O_{18}$  (M+Na) 1700.669, found 1700.879.

**Boc-G2-I-NH<sub>2</sub>-All (35):** Boc-G2-I-Cl-All (**34**) (458 mg, 0.273 mmol) was dissolved in anhydrous DMF (5.4 mL). To this solution was added NaN<sub>3</sub> (177 mg, 2.73 mmol). After stirring at 50°C for 48 h, the solvent was removed under reduced pressure. The residue was redissolved in water (30 mL) and CHCl<sub>3</sub> (20 mL). The organic layer was extracted and washed with brine (20 mL) and dried over Na<sub>2</sub>SO<sub>4</sub>. After concentration *in vacuo*, the residue was redissolved in anhydrous EtOH (2.7 mL). 10% Pd/C (46 mg) was added to this mixture and the reaction was hydrogenated under H<sub>2</sub> at atmospheric pressure for 12 h. The catalyst was removed by filtration through a pad of celite. The solvent was removed *in vacuo* and the residue was purified by column chromatography on silica gel (1-5% MeOH/CHCl<sub>3</sub> to give Boc-G2-I-NH<sub>2</sub>-All (**35**) (305 mg, 0.184 mmol, 67% over 2 steps) as an off-white solid. mp (dec) 235 °C (CHCl<sub>3</sub>); <sup>1</sup>H NMR (400 MHz, 80°C, DMSO-*d*<sub>6</sub>) δ 1.23 (s, 36H), 1.53-1.71 (m, 8H), 1.82-1.89 (m, 4H), 1.96-2.05 (m, 4H), 3.10-3.20 (m, 4H), 4.17 (dd, *J* = 8.6 Hz, 4.5 Hz, 4H), 6.78 (s, 2H), 7.28-7.34 (m, 8H), 7.60-7.63 (m, 4H), 7.68 (s, 2H), 7.84-7.86 (m, 4H), 9.04 (s, 4H), 9.53 (s, 4H), 10.85 (s, 4H); <sup>13</sup>C NMR (100 MHz, DMSO-*d*<sub>6</sub>) δ 22.9, 27.4, 29.9, 46.0, 60.2, 78.3, 110.0, 114.7, 124.3, 124.7, 124.9, 125.2, 129.8, 130.4, 148.3, 148.4, 149.4, 153.0, 156.9, 161.2, 163.4, 171.6; IR (KBr) 3484, 3278, 2973, 2928, 2875, 2364, 1681, 1601, 1573, 1519, 1475, 1399, 1362, 1300, 1258, 1162, 1121 cm<sup>-1</sup>; MALDI-TOF MS calcd for C<sub>85</sub>H<sub>98</sub>N<sub>18</sub>O<sub>18</sub> (M+Na) 1681.719, found 1681.917.

**Boc-II-G1-NO<sub>2</sub>-All (36):** To a solution of Boc-G1-NH<sub>2</sub>-All (**32**) (0.50 g, 0.66 mmol) in dry CH<sub>2</sub>Cl<sub>2</sub> (3.3 mL) were added DMAP (16 mg, 0.13 mmol) and pyridine (3.3 mL). The reaction mixture was cooled to 0°C in an ice bath. To this mixture was added a solution of 2-nitrobenzoyl

chloride (122 mg, 0.66 mmol) in CH<sub>2</sub>Cl<sub>2</sub> (0.7 mL) dropwise over 5 min. The reaction was stirred while warming to rt gradually over 12 h. The reaction was diluted with CH<sub>2</sub>Cl<sub>2</sub> (10 mL) and washed with cold 1 M HCl (15 mL). The aqueous layer was back-extracted with CHCl<sub>3</sub> (2 x 10 mL). The combined organic layer was treated with solid NaHCO<sub>3</sub> until pH ~7 and dried over Na<sub>2</sub>SO<sub>4</sub>. After concentration *in vacuo*, the residue was purified by column chromatography on silica gel (1-3% MeOH/CHCl<sub>3</sub>) to afford Boc-II-G1-NO<sub>2</sub>-All (**36**) (289 mg, 0.319 mmol, 48%) as an off-white solid. mp 185 °C (CHCl<sub>3</sub>); <sup>1</sup>H NMR (400 MHz, 80°C, DMSO-*d*<sub>6</sub>) δ 1.26 (s, 18H), 1.55-1.71 (m, 4H), 1.84-1.91 (m, 2H), 1.98-2.07 (m, 2H), 3.12-3.23 (m, 4H), 4.19 (dd, *J* = 8.7 Hz, 4.4 Hz, 2H), 7.23-7.34 (m, 4H), 7.62-7.64 (m, 2H), 7.82-7.84 (m, 2H), 7.87 (td, *J* = 7.6 Hz, 1.7 Hz, 2H), 7.94 (td, *J* = 7.5 Hz, 1.1 Hz, 1H), 8.22 (dd, *J* = 8.2 Hz, 1.0 Hz, 1H), 8.72 (s, 2H), 9.56 (s, 2H), 10.87 (s, 2H), 11.38 (s, 1H); <sup>13</sup>C NMR (100 MHz, DMSO-*d*<sub>6</sub>) δ 23.0, 27.5, 30.0, 46.1, 60.3, 78.4, 114.0, 123.9, 124.4, 124.8, 125.0, 125.3, 128.8, 129.8, 130.6, 131.1, 131.2, 133.8, 146.0, 148.6, 149.5, 153.1, 161.2, 165.0, 171.6; IR (KBr) 3447, 3355, 3086, 2978, 2931, 2347, 1681, 1596, 1531, 1481, 1393, 1367, 1349, 1296, 1256, 1160, 1128 cm<sup>-1</sup>; HRMS calcd for C<sub>46</sub>H<sub>51</sub>N<sub>9</sub>O<sub>11</sub> (M+Na) 928.3600, found 928.3609.

**Boc-II-G1-NH<sub>2</sub>-All (37):** Boc-II-G1-NO<sub>2</sub>-All (**36**) (289 mg, 0.320 mmol) was dissolved in anhydrous EtOH. 10% Pd/C (29 mg) was added to this mixture and the reaction was hydrogenated under H<sub>2</sub> at atmospheric pressure for 12 h. The catalyst was removed by filtration through a pad of celite. The solvent was removed *in vacuo* and the residue was purified by column chromatography on silica gel (1-3% MeOH/CHCl<sub>3</sub>) to give Boc-II-G1-NH<sub>2</sub>-All (**37**) (237 mg, 0.271 mmol, 85%) as an off-white solid. mp 174-178 °C (CHCl<sub>3</sub>); <sup>1</sup>H NMR (400 MHz, 80°C, DMSO-*d*<sub>6</sub>) δ 1.24 (s, 18H), 1.54-1.70 (m, 4H), 1.79-1.88 (m, 2H), 1.95-2.05 (m, 2H),

3.10-3.20 (m, 4H), 4.16 (dd,  $J = 9.0$  Hz, 4.4 Hz, 2H), 6.42 (brs, 2H), 6.65 (td, 7.0 Hz, 1.4 Hz, 1H), 6.84 (dd,  $J = 8.4$  Hz, 1.1 Hz, 1H), 7.23-7.34 (m, 5H), 7.59-7.61 (m, 2H), 7.78-7.82 (m, 3H), 8.84 (s, 2H), 9.53 (s, 2H), 10.82 (s, 2H);  $^{13}\text{C}$  NMR (100 MHz, DMSO- $d_6$ )  $\delta$  23.0, 27.5, 30.0, 46.1, 60.2, 69.5, 78.3, 113.3, 114.4, 116.5, 124.4, 124.7, 124.9, 125.2, 128.5, 129.9, 130.5, 132.6, 149.1, 149.4, 150.2, 153.1, 161.4, 168.3, 171.6; IR (KBr) 3440, 3258, 2973, 2877, 2358, 1677, 1594, 1517, 1478, 1447, 1391, 1361, 1292, 1235, 1157, 1123  $\text{cm}^{-1}$ ; HRMS calcd for  $\text{C}_{46}\text{H}_{53}\text{N}_9\text{O}_9$  (M+Na) 898.3864, found 898.3859.

**Boc-G2-II-H-All (38):** To a solution of Boc-II-G1-NH<sub>2</sub>-All (**37**) (596 mg, 0.68 mmol) in dry  $\text{CH}_2\text{Cl}_2$  (3.4 mL) were added DMAP (17 mg, 0.14 mmol) and pyridine (3.4 mL). The reaction mixture was cooled to 0°C in an ice bath. To this mixture was added a solution of 2,6-pyridinedicarbonyl dichloride (69 mg, 0.34 mmol) in  $\text{CH}_2\text{Cl}_2$  (0.4 mL) dropwise over 5 min. The reaction was stirred while warming to rt gradually over 12 h. The reaction was diluted with  $\text{CH}_2\text{Cl}_2$  (10 mL) and washed with cold 1 M HCl (10 mL). The aqueous layer was back-extracted with  $\text{CHCl}_3$  (2 x 10 mL). The organic layer was treated with solid  $\text{NaHCO}_3$  until pH ~7 and dried over  $\text{Na}_2\text{SO}_4$ . After concentration *in vacuo*, the residue was purified by column chromatography on silica gel (5-15% MeOH/ether) to afford Boc-G2-II-H-All (**38**) (356 mg, 0.190 mmol, 56%) as an off-white solid. mp (dec) 215 °C ( $\text{CHCl}_3$ );  $^1\text{H}$  NMR (400 MHz, 80°C, DMSO- $d_6$ )  $\delta$  1.21 (s, 36H), 1.50-1.65 (m, 8H), 1.77-1.85 (m, 4H), 1.92-2.01 (m, 4H), 3.05-3.16 (m, 8H), 4.12 (dd,  $J = 9.0$  Hz, 4.6 Hz, 4H), 7.19 (t,  $J = 7.8$  Hz, 2H), 7.27-7.34 (m, 8H), 7.46 (t,  $J = 8.2$  Hz, 2H), 7.57 (d,  $J = 7.8$  Hz, 4H), 7.77 (dd,  $J = 4$  Hz, 1.5 Hz, 2H), 7.83 (dd,  $J = 3.9$  Hz, 1.4 Hz, 4H), 8.28 (d,  $J = 7.5$  Hz, 2H), 8.31 (t,  $J = 2.8$  Hz, 1H), 8.38 (d,  $J = 1.8$  Hz, 2H), 8.57 (s, 4H), 9.57 (s, 4H), 10.70 (s, 4H), 10.87 (s, 2H), 11.95 (s, 2H);  $^{13}\text{C}$  NMR (100 MHz, DMSO- $d_6$ )  $\delta$  22.9, 27.5, 30.1,

46.0, 60.2, 78.3, 114.6, 122.2, 123.5, 123.9, 124.4, 124.50, 124.56, 124.64, 125.0, 128.5, 130.0, 131.7, 136.7, 138.5, 139.9, 148.4, 148.8, 148.9, 153.0, 160.9, 161.0, 166.9, 171.7; IR (KBr) 3460, 3281, 3075, 2977, 2878, 2359, 1691, 1588, 1526, 1477, 1450, 1395, 1367, 1302, 1254, 1161, 1127, 1087  $\text{cm}^{-1}$ ; HRMS calcd for  $\text{C}_{99}\text{H}_{107}\text{N}_{19}\text{O}_{20}$  ( $\text{M}+\text{Na}$ ) 1905.7866, found 1905.7880.

**G2-II-All-Cat (4):** To a solution of Boc-G2-II-H-All (**38**) (200 mg, 0.107 mmol) in  $\text{CH}_2\text{Cl}_2$  (1.1 mL) was added anisole (107  $\mu\text{L}$ , 0.989 mmol) at rt. The mixture was cooled to  $0^\circ\text{C}$  and TFA (1.1 mL, 1.4 mmol) was added dropwise over 5 min. The reaction was stirred while warming to rt gradually over 12 h. The volatiles were removed *in vacuo*. To the residue was added diethyl ether (10 mL) and the solid precipitate was isolated by filtration. The precipitate was redissolved in a mixture of  $\text{H}_2\text{O}$  (2 mL) and  $\text{CH}_3\text{CN}$  (2 mL). To this mixture was added solid  $\text{NaHCO}_3$  with stirring until pH  $\sim 8$ . The white solid precipitate was isolated by filtration and dried *in vacuo* over  $\text{P}_2\text{O}_5$  to give G2-II-H-All-Cat (**4**) (150 mg, 0.102 mmol, 95%) as a white solid. mp (dec)  $220^\circ\text{C}$  ( $\text{CHCl}_3$ );  $^1\text{H}$  NMR (400 MHz,  $80^\circ\text{C}$ ,  $\text{DMSO}-d_6$ )  $\delta$  1.65-1.78 (m, 8H), 1.94-2.02 (m, 4H), 2.15-2.24 (m, 4H), 3.03-3.14 (m, 8H), 3.92 (brs, 4H), 4.37 (dd,  $J = 9.1$  Hz, 7.1 Hz, 4H), 7.24 (t,  $J = 7.9$  Hz, 2H), 7.33-7.38 (m, 8H), 7.49 (t, 2H), 7.65-7.67 (m, 8H), 7.78 (dd,  $J = 7.8$  Hz, 1.7 Hz, 2H), 8.15 (dd,  $J = 8.2$  Hz, 1.1 Hz, 2H), 8.28 (t,  $J = 5.6$  Hz, 1H), 8.31 (t,  $J = 8.6$  Hz, 2H), 8.34 (d,  $J = 2.9$  Hz, 2H), 8.58 (s, 4H), 9.94 (brs, 4H), 10.46 (s, 4H), 10.96 (s, 2H), 11.79 (s, 2H);  $^{13}\text{C}$  NMR (100 MHz,  $\text{DMSO}-d_6$ )  $\delta$  22.9, 28.8, 45.2, 59.3, 114.7, 122.4, 123.5, 124.4, 124.6, 125.0, 125.4, 125.5, 125.6, 128.5, 130.2, 131.6, 136.4, 148.3, 148.5, 149.1, 157.9, 158.1, 161.0, 161.3, 166.9, 167.1; IR (KBr) 3464, 3356, 3256, 3076, 2986, 2752, 2374, 1678, 1583, 1520, 1448, 1403, 1353, 1304, 1202, 1134  $\text{cm}^{-1}$ ; HRMS calcd for  $\text{C}_{79}\text{H}_{75}\text{N}_{19}\text{O}_{12}$  ( $\text{M}+\text{Na}$ ) 1504.5735, found 1504.5741.

**Boc-G3-I-H-All (39):** To a solution of Boc-G2-I-NH<sub>2</sub>-All (**35**) (152 mg, 0.092 mmol) in dry CH<sub>2</sub>Cl<sub>2</sub> (1.0 mL) were added DMAP (2 mg, 0.018 mmol) and pyridine (0.75 mL). The reaction mixture was cooled to 0°C in an ice bath. To this mixture was added a solution of 2,6-pyridinedicarbonyl dichloride (9.4 mg, 0.046 mmol) in CH<sub>2</sub>Cl<sub>2</sub> (0.1 mL) dropwise over 5 min. The reaction was stirred while warming to rt gradually over 12 h. The reaction was diluted with CH<sub>2</sub>Cl<sub>2</sub> (10 mL) and washed with cold 1 M HCl (5 mL). The aqueous layer was back-extracted with CHCl<sub>3</sub> (2 x 10 mL). The combined organic layer was treated with solid NaHCO<sub>3</sub> until pH ~7 and dried over Na<sub>2</sub>SO<sub>4</sub>. After concentration *in vacuo*, the residue was purified by column chromatography on silica gel (1-5% MeOH/CHCl<sub>3</sub>) to afford Boc-G3-I-H-All (**39**) (110 mg, 0.032 mmol, 69%) as an off-white solid. mp (dec) 245 °C (CHCl<sub>3</sub>); <sup>1</sup>H NMR (400 MHz, 80°C, DMSO-*d*<sub>6</sub>) δ 1.23 (s, 72H), 1.52-1.71 (m, 16H), 1.82-1.89 (m, 8H), 1.95-2.03 (m, 8H), 3.10-3.20 (m, 16H), 4.17 (dd, *J* = 8.6 Hz, 4.4 Hz, 8H), 7.27-7.35 (m, 16H), 7.60-7.62 (m, 8H), 7.84-7.86 (m, 8H), 8.46 (dd, *J* = 9.1 Hz, 7.5 Hz, 1H), 8.60 (d, *J* = 8.0 Hz, 2H), 9.10 (s, 8H), 9.17 (s, 4H), 9.54 (s, 8H), 10.88 (s, 8H), 11.63 (s, 2H), 11.67 (s, 4H); <sup>13</sup>C NMR (100 MHz, DMSO-*d*<sub>6</sub>) δ 22.9, 27.4, 29.9, 46.0, 60.2, 78.3, 114.9, 116.4, 124.3, 124.7, 124.9, 125.2, 126.1, 129.8, 130.4, 147.9, 148.2, 148.3, 149.1, 149.5, 153.0, 161.1, 161.2, 162.6, 162.9, 171.6; IR (KBr) 3478, 3281, 2986, 2914, 2842, 2359, 1683, 1597, 1580, 1517, 1477, 1445, 1396, 1360, 1342, 1306, 1163, 1126 cm<sup>-1</sup>; MALDI-TOF MS calcd for C<sub>177</sub>H<sub>197</sub>N<sub>37</sub>O<sub>38</sub> (M+Na-C<sub>40</sub>O<sub>16</sub>H<sub>64</sub>) 2671.032, found 2671.957.

**G3-I-All-Cat (5):** To a solution of Boc-G3-I-H-All (**39**) (110 mg, 0.0319 mmol) in CH<sub>2</sub>Cl<sub>2</sub> (3.2 mL) was added anisole (276 μL, 2.55 mmol) at rt. The mixture was cooled to 0°C and TFA (393 μL, 5.10 mmol) was added dropwise over 5 min. The reaction was stirred while warming to rt

gradually over 12 h. The volatiles were removed *in vacuo*. To the residue was added diethyl ether (5 mL) and the solid precipitate was isolated by filtration. The precipitate was redissolved in a mixture of H<sub>2</sub>O (1 mL) and CH<sub>3</sub>CN (1 mL). To this mixture was added solid NaHCO<sub>3</sub> with stirring until pH ~8. The white solid precipitate was isolated by filtration and dried *in vacuo* over P<sub>2</sub>O<sub>5</sub> to give G3-I-H-All-Cat (**5**) (82 mg, 0.0309 mmol, 97%) as a white solid. mp (dec) 285 °C (CHCl<sub>3</sub>); <sup>1</sup>H NMR (400 MHz, 80°C, DMSO-*d*<sub>6</sub>) δ 1.69-1.76 (m, 16H), 1.99-2.07 (m, 8H), 2.18-2.27 (m, 8H), 3.06-3.12 (m, 16H), 4.38 (t, *J* = 7.6 Hz, 8H), 7.33-7.38 (m, 16H), 7.72-7.74 (m, 16H), 8.46 (t, *J* = 8.2 Hz, 1H), 8.59 (d, *J* = 7.9 Hz, 2H), 9.09 (s, 8H), 9.16 (s, 4H), 10.72 (s, 8H), 11.74 (s, 2H), 11.75 (s, 4H); <sup>13</sup>C NMR (100 MHz, DMSO-*d*<sub>6</sub>) δ 23.2, 29.2, 45.4, 59.5, 115.0, 116.5, 124.6, 125.4, 125.9, 126.0, 126.2, 129.9, 131.1, 148.0, 148.1, 148.4, 149.2, 149.8, 161.7, 162.8, 163.1, 168.0; IR (KBr) 3455, 3283, 3076, 2923, 2356, 1673, 1601, 1574, 1516, 1453, 1412, 1344, 1384, 1200, 1133 cm<sup>-1</sup>; MALDI-TOF MS calcd for C<sub>137</sub>H<sub>133</sub>N<sub>37</sub>O<sub>22</sub> (M+H) 2649.051, found 2649.441.

#### Bis-G1 Bn Amine (**40**):

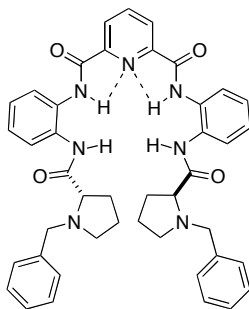

To a solution of G1-All-Cat (**2**) (54 mg, 0.1 mmol) in acetonitrile (2 mL) and water (0.5 mL) was sequentially added NaHCO<sub>3</sub> (25 mg, 0.3 mmol) at rt and benzyl bromide (24 μL, 0.2 mmol) at 0°C. The reaction was stirred for 24 h at 5 °C. After the removal of solvents under reduced

pressure, the crude material was purified by column chromatography on silica gel (20% EtOAc/ether) to give Bis-G1-Bn Amine (**40**) (68 mg, 0.094 mmol, 94%) as a white solid. mp 189-191 °C (CHCl<sub>3</sub>); <sup>1</sup>H NMR (CDCl<sub>3</sub>) δ 1.54-1.65 (m, 4H), 1.77-1.92 (m, 4H), 2.26-2.33 (m, 2H), 2.98-3.06 (m, 4H), 3.53 (d, *J* = 13.3 Hz, 2H), 3.78 (d, *J* = 13.3 Hz, 2H), 6.99-7.00 (m, 6H), 7.10-7.13 (m, 4H), 7.23-7.32 (m, 4H), 7.49 (d, *J* = 8.1 Hz, 2H), 7.88 (d, *J* = 9.6 Hz, 2H), 8.10 (t, *J* = 8.9 Hz, 1H), 8.43 (d, *J* = 9.6 Hz, 2H), 9.68 (s, 2H), 11.13 (s, 2H); <sup>13</sup>C NMR (CDCl<sub>3</sub>) δ 24.20, 30.73, 54.31, 59.89, 67.15, 124.12, 125.11, 125.31, 125.85, 125.94, 127.16, 128.16, 128.52, 129.80, 130.28, 137.89, 139.11, 148.68, 161.84, 174.33; IR (KBr) 3292, 3204, 2941, 2820, 1684, 1640, 1591, 1530, 1486, 1448, 1310 cm<sup>-1</sup>; HRMS calcd for C<sub>43</sub>H<sub>43</sub>N<sub>7</sub>O<sub>4</sub> (M+Na) 744.3275, found 744.3158.

**Bis-G2-I-Bn Amine (41):**

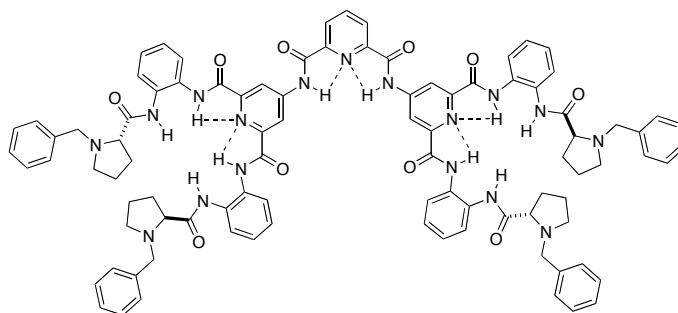

To a solution of G2-I-All-Cat (**3**) (13.6 mg, 0.011 mmol) in acetonitrile (0.5 mL) and water (0.1 mL) was sequentially added NaHCO<sub>3</sub> (9.3 mg, 0.11 mmol) at rt and benzyl bromide (13 μL, 0.11 mmol) at 0°C. The reaction was stirred for 24 h at 5 °C. After the removal of solvents under

reduced pressure, the crude material was purified by column chromatography on silica gel (2-4% MeOH/CHCl<sub>3</sub>) to give Bis-G2-I-Bn Amine (**41**) (12 mg, 0.0074 mmol, 67%) as a white solid. mp 235 °C (dec) (CHCl<sub>3</sub>); <sup>1</sup>H NMR (DMSO-*d*<sub>6</sub>) δ 1.50-1.62 (m, 8H), 1.70-1.78 (m, 4H), 1.90-2.00 (m, 4H), 2.16-2.24 (m, 4H), 2.75-2.80 (m, 4H), 3.09-3.16 (m, 4H), 3.47 (d, *J* = 13.2 Hz, 4H), 3.74 (d, *J* = 13.0 Hz, 4H), 6.98-7.05 (m, 12H), 7.10-7.14 (m, 8H), 7.23-7.33 (m, 8H), 7.61 (d, *J* = 7.9 Hz, 4H), 7.80 (d, *J* = 8.4 Hz, 4H), 8.44 (t, *J* = 7.9 Hz, 1H), 8.57 (d, *J* = 8.4 Hz, 2H), 9.04 (s, 4H), 9.80 (s, 4H), 11.04 (s, 4H), 11.66 (s, 2H); <sup>13</sup>C NMR (DMSO-*d*<sub>6</sub>) δ 23.94, 30.66, 53.85, 59.40, 67.45, 115.40, 123.57, 123.55, 125.16, 126.75, 126.97, 127.12, 128.29, 128.90, 128.81, 132.80, 138.47, 148.53, 149.00, 149.94, 162.32, 163.61, 173.46; IR (KBr) 3474, 3288, 2973, 2816, 1666, 1587, 1527, 1448, 1309 cm<sup>-1</sup>; MALDI-TOF MS calcd for C<sub>93</sub>H<sub>89</sub>N<sub>17</sub>O<sub>10</sub> (M) 1604.8097, found 1604.894.

#### H. <sup>1</sup>H-NMR and <sup>13</sup>C-NMR spectrum of 1-9 and 40-41





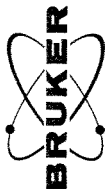

Current Data Parameters  
NAME H-Pro-Ph  
EXPNO 2  
PROCNO 1

F2 - Acquisition Parameters  
Date\_ 20070528  
Time 23.37  
INSTRUM spect  
PROBHD 5 mm QNP 1H/13  
PULPROG zgpg30  
TD 65536  
SOLVENT CDCl3  
NS 41  
DS 4  
SWH 23980.814 Hz  
FIDRES 0.365918 Hz  
AQ 1.3654756 sec  
RG 2048  
DM 20.850 usec  
DE 6.00 usec  
TE 300.2 K  
D1 2.00000000 sec  
d11 0.03000000 sec  
DELTA 1.89999998 sec  
MCREST 0.00000000 sec  
MCWRK 0.01500000 sec

\*\*\*\*\* CHANNEL f1 \*\*\*\*\*  
NUC1 13C  
P1 10.50 usec  
PL1 0.00 dB  
SFO1 100.6228298 MHz

\*\*\*\*\* CHANNEL f2 \*\*\*\*\*  
CPEPRG2 waltz16  
NUC2 1H  
PCPD2 80.00 usec  
PL2 -6.00 dB  
PL12 14.56 dB  
PL13 120.00 dB  
SFO2 400.1316005 MHz

F2 - Processing parameters  
SI 32768  
SF 100.6127690 MHz  
WDW EM  
SSB 0  
LB 1.00 Hz  
GB 0  
PC 1.00

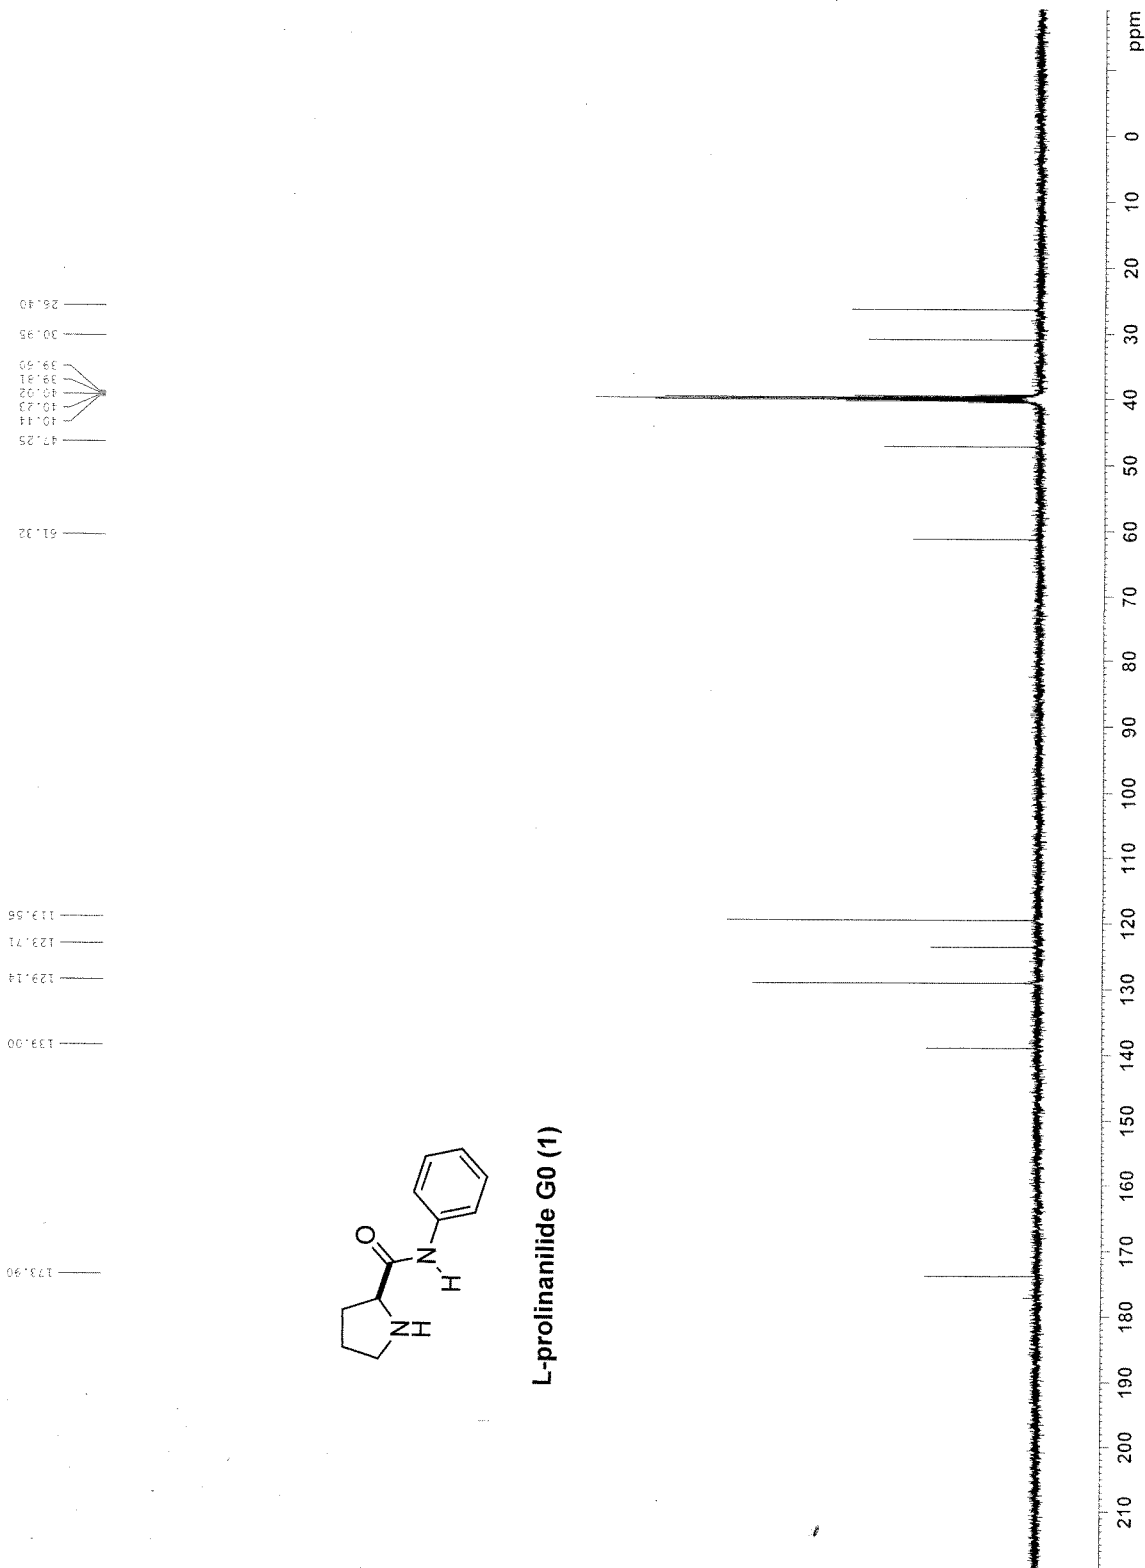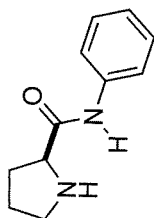

L-prolinamide G0 (1)



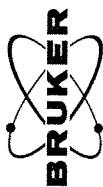

```

Current Data Parameters
NAME      Bis-G1-Cat
EXPNO    3
PROCNO   1

F2 - Acquisition Parameters
Date_    20070514
Time     1.31
INSTRUM  spect
PROBHD   5 mm QNP 1H/13
PULPROG  zgpg30
TD       65536
SOLVENT  CDCl3
NS       6801
DS       4
SWH      23980.814 Hz
FIDRES   0.365918 Hz
AQ       1.3664756 sec
RG       8192
DW       20.850 usec
DE       6.00 usec
TE       363.2 K
D1       2.00000000 sec
d11      0.03000000 sec
DELTA    1.89999998 sec
MCREST   0.00000000 sec
MCRK     0.01500000 sec

===== CHANNEL f1 =====
NUC1     13C
P1       10.50 usec
PL1      0.00 dB
SFO1     100.628298 MHz

===== CHANNEL f2 =====
CPDPRG2  waitz16
NUC2     1H
PCPD2    80.00 usec
PL2      -6.00 dB
PL12     14.56 dB
PL13     120.00 dB
SFO2     400.1316005 MHz

F2 - Processing parameters
SI       32768
SF       100.6128682 MHz
WDW      EM
SSB      0
LB       1.00 Hz
GB       0
PC       1.40
    
```

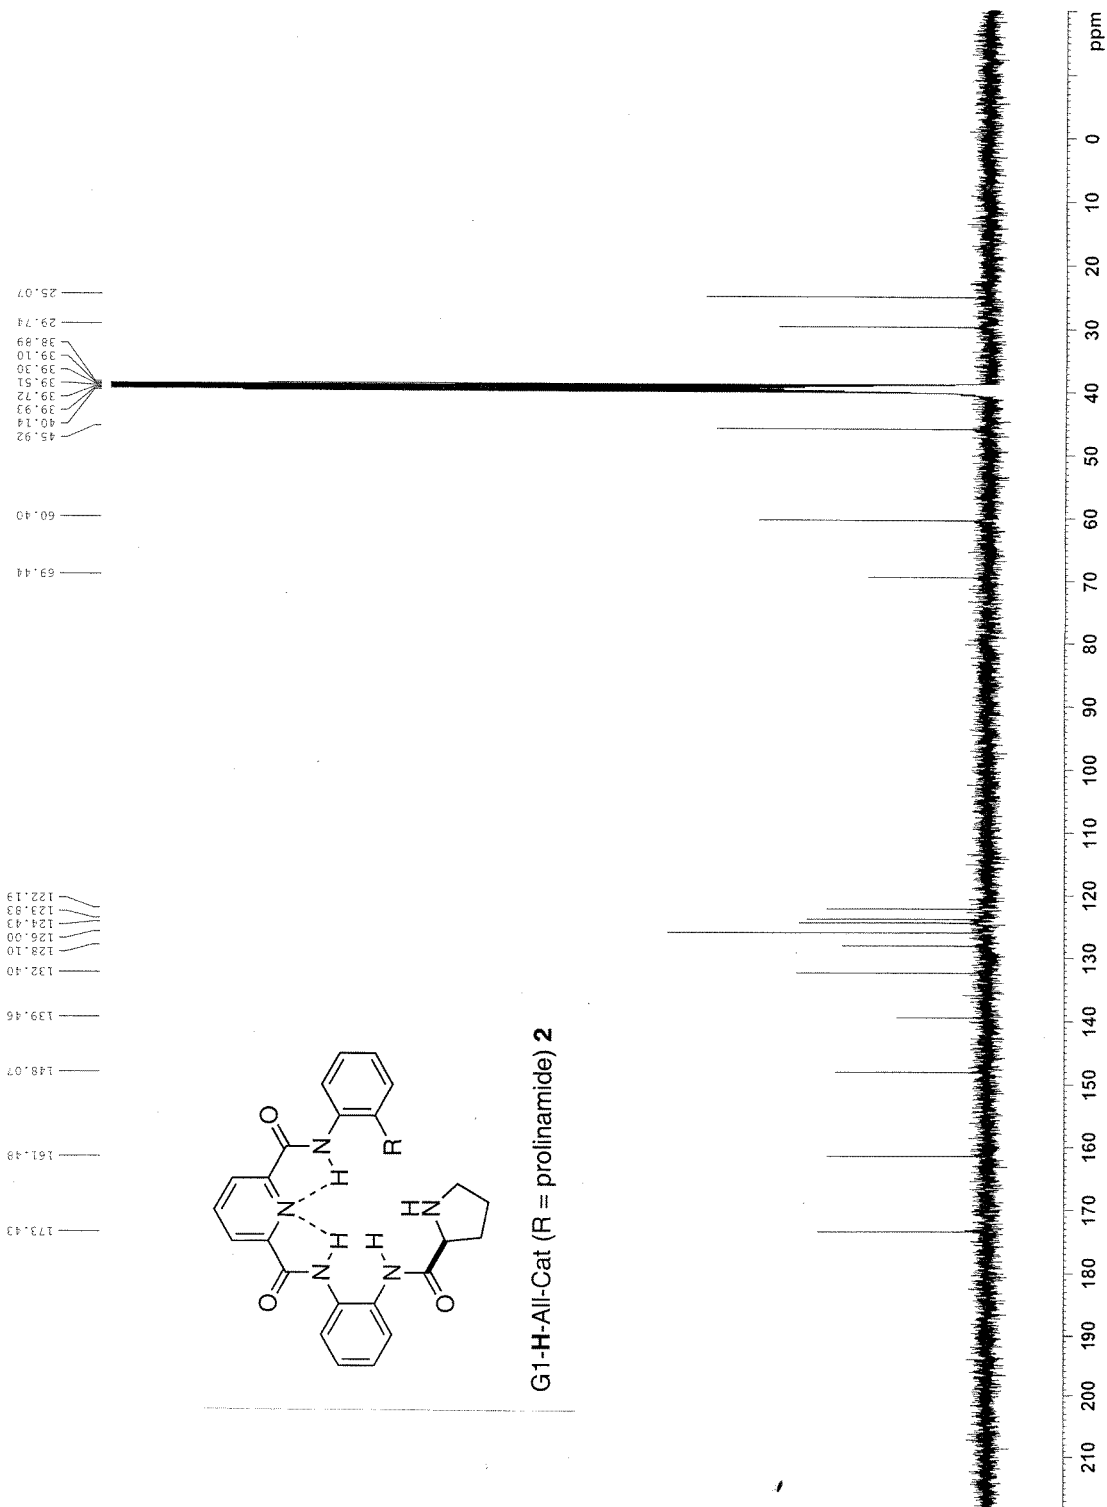

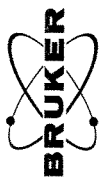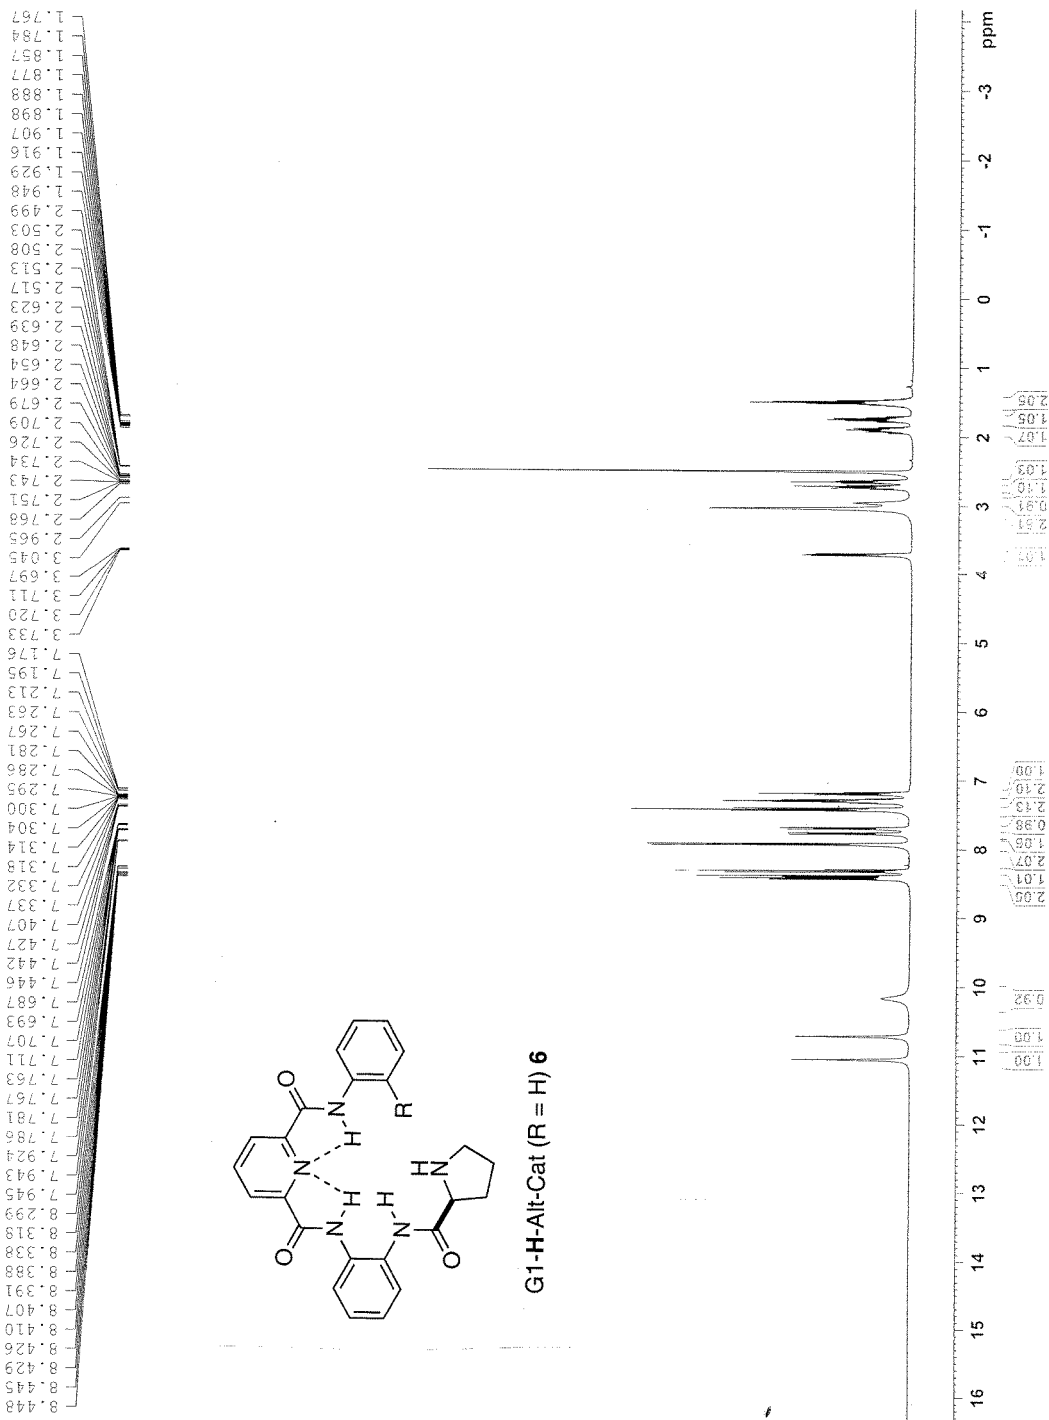

Current Data Parameters  
 NAME Mono-G1-Cat  
 EXPNO 2  
 PROCNO 1  
 F2 - Acquisition Parameters  
 Date\_ 20070413  
 Time 14.22  
 INSTRUM spect  
 PROSHD 5 mm QNP 1H/13  
 PULPROG zgpg30  
 TD 65536  
 SOLVENT DMSO  
 NS 50  
 DS 0  
 SMH 8278.146 Hz  
 FIDRES 0.126314 Hz  
 AQ 3.9584243 sec  
 RG 645.1  
 DW 60.400 usec  
 DE 6.00 usec  
 TE 353.2 K  
 EI 2.00000000 sec  
 PCREST 0.00000000 sec  
 MCWPRK 0.01500000 sec  
 ===== CHANNEL f1 =====  
 NUCl 1H  
 FI 13.00 usec  
 FL1 0.00 dB  
 SFO1 400.1324710 MHz  
 F2 - Processing parameters  
 SI 32768  
 SF 400.1300000 MHz  
 WDM 0  
 SSB 0  
 LB 0.30 Hz  
 GB 0  
 PC 1.00

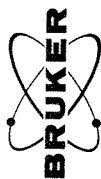

```

Current Data Parameters
NAME      Mono-G1-Cat
EXPNO    3
PROCNO   1

F2 - Acquisition Parameters
Date_    20070416
Time     20.20
INSTRUM  spect
PROBHD   5 mm QNP 1H/1
PULPROG  zgpg30
TD        65536
SOLVENT  CDCl3
NS        12550
DS        4
SWH       23080.814 Hz
FIDRES   0.365018 Hz
AQ        1.3668756 sec
RG        9195.2
DM        20.850 usec
DE        6.00 usec
TE        353.2 K
D1        2.00000000 sec
d11       0.03000000 sec
DELTA    1.89999998 sec
MCREST   0.00000000 sec
MCWRRK   0.01500000 sec

===== CHANNEL f1 =====
NUC1      13C
P1        10.50 usec
PL1       0.00 dB
SFO1      100.6228298 MHz

===== CHANNEL f2 =====
CPDPRG2  waltz16
NUC2      1H
PCPD2    80.00 usec
PL2       -6.00 dB
PL12     14.56 dB
PL13     120.00 dB
SFO2     400.1316005 MHz

F2 - Processing Parameters
SI        32768
SF        100.6128616 MHz
WDW       EM
SSB       0
LB        1.00 Hz
GB        0
PC        1.40
    
```

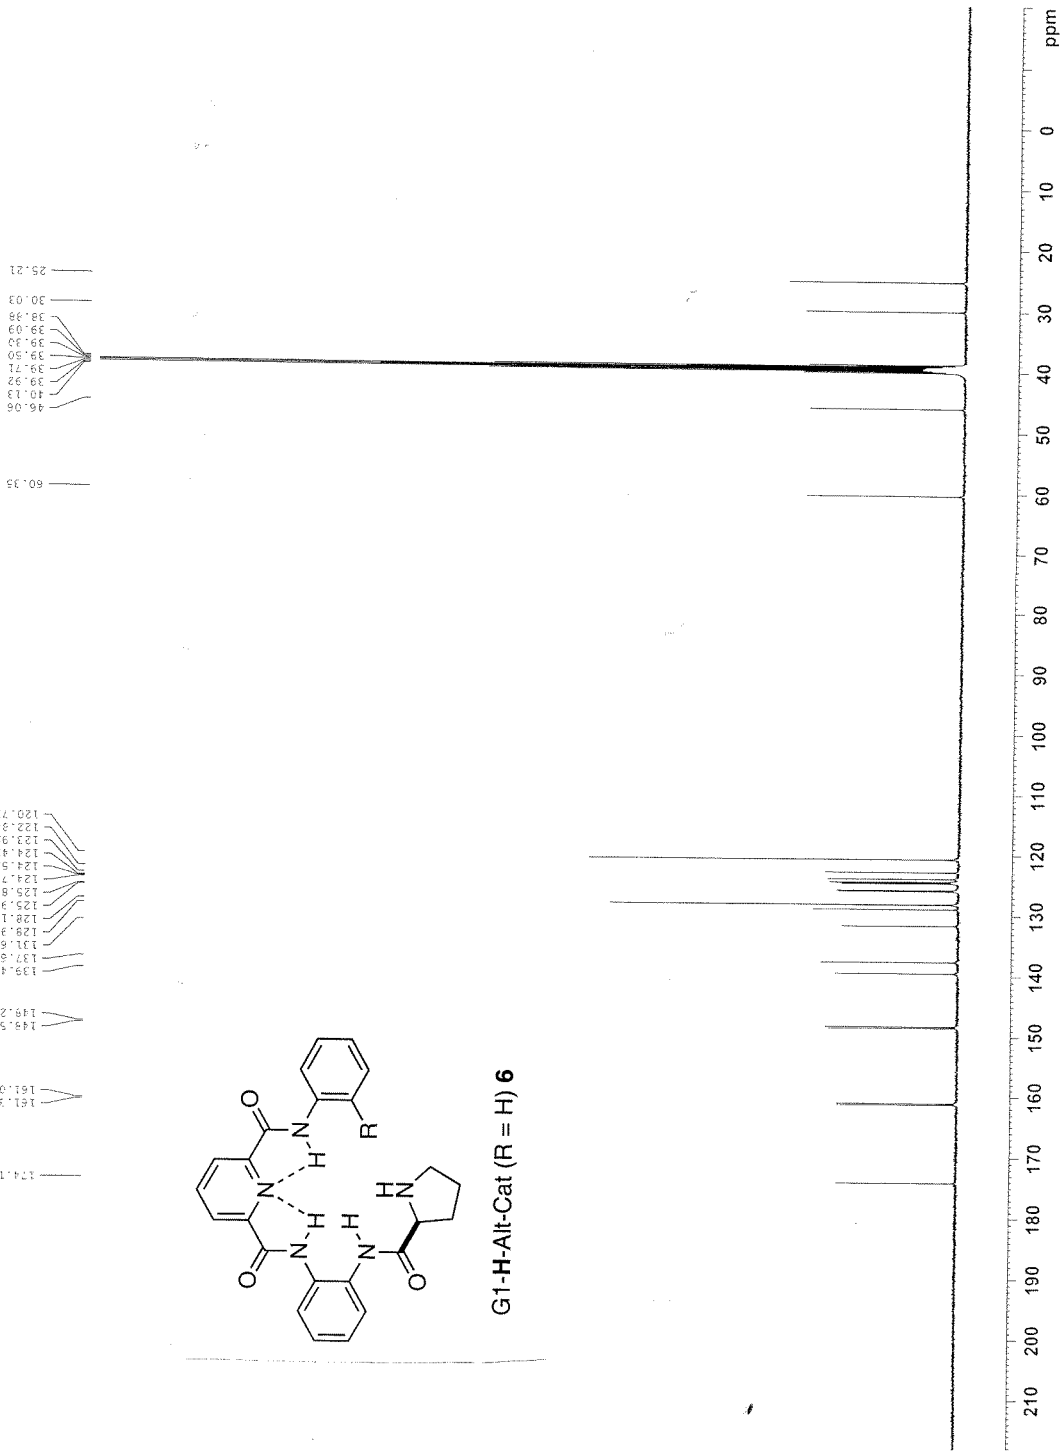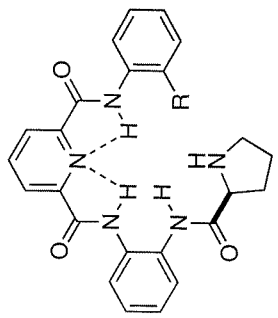

G1-H-Alt-Cat (R = H) 6

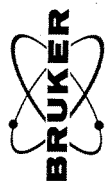

Current Data Parameters  
 NAME SAH-II-36  
 EXENO 2  
 PROCNO 1

F2 - Acquisition Parameters  
 Date\_ 20050905  
 Time\_ 11.18  
 INSTRUM spect  
 PROBHD 5 mm Multinucl  
 PULPROG zg30  
 TD 32768  
 SOLVENT DMSO  
 NS 128  
 DS 0  
 SWH 8278.146 Hz  
 FIDRES 0.252629 Hz  
 AQ 1.9792372 sec  
 RG 574.7  
 DW 60.400 usec  
 DE -6.00 usec  
 TE 353.2 K  
 DA 2.0000000 sec  
 MCREST 0.0000000 sec  
 MCWRRK 0.0150000 sec

\*\*\*\*\* CHANNEL f1 \*\*\*\*\*  
 NUC1 1H  
 P1 7.50 usec  
 PL1 -6.00 dB  
 SFO1 400.1324710 MHz

F2 - Processing parameters  
 SI 16384  
 SF 400.1300064 MHz  
 WDW EM  
 SSB 0  
 LB 0.30 Hz  
 GB 0  
 PC 1.00

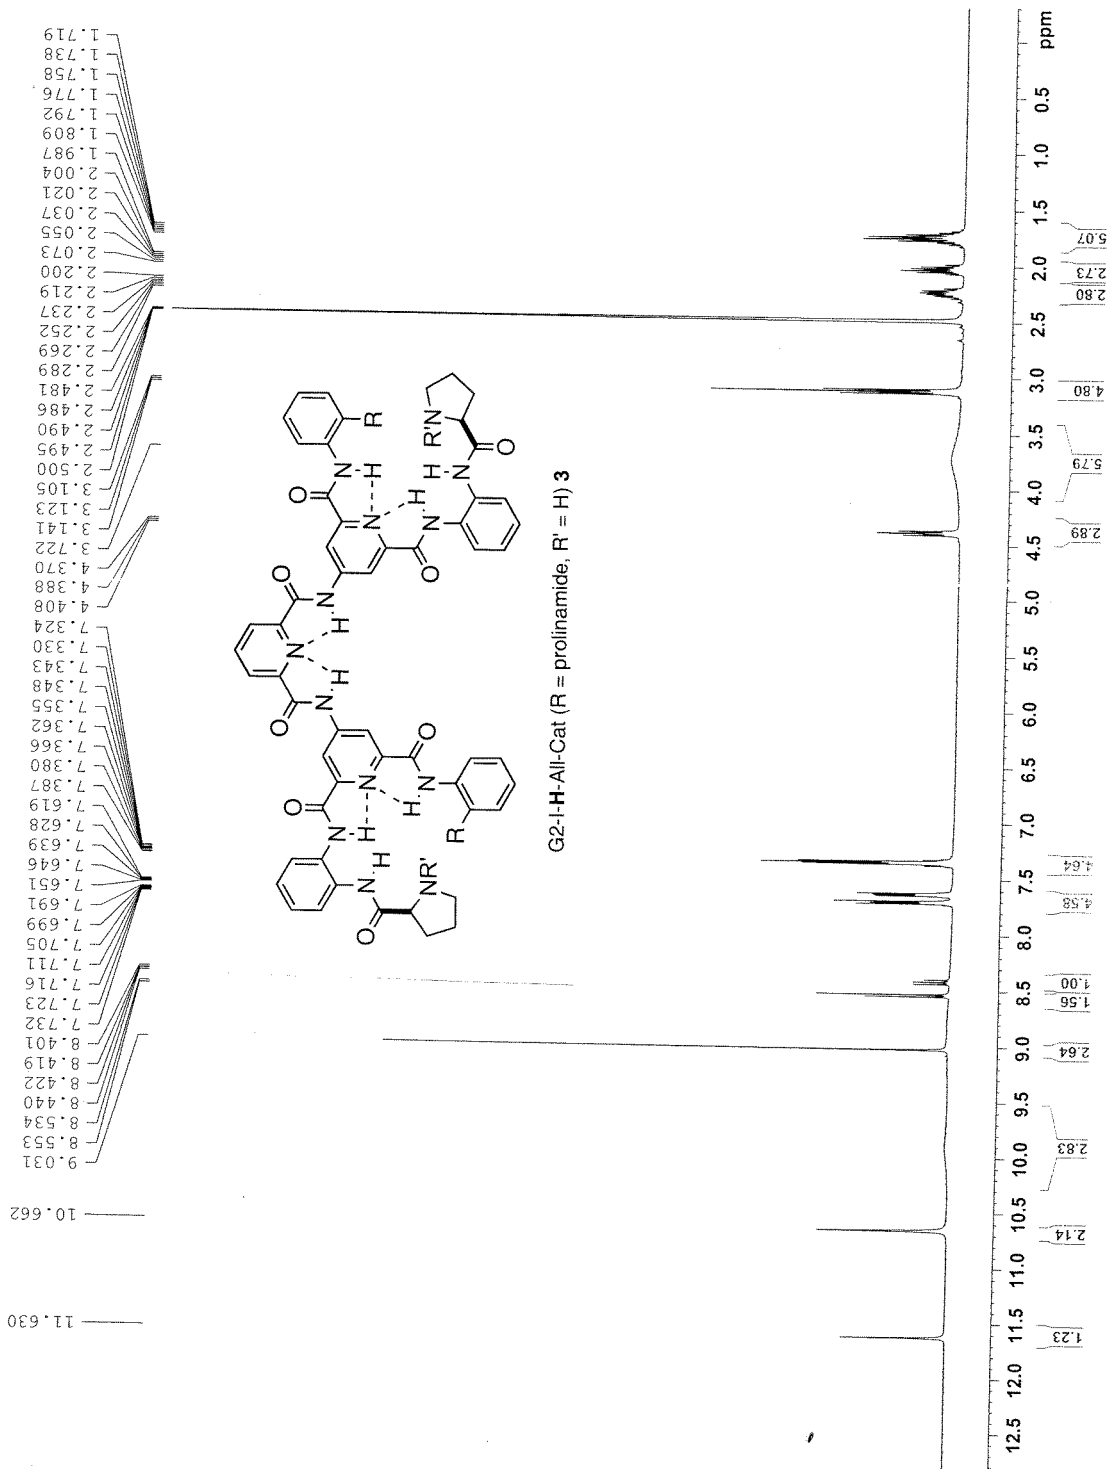

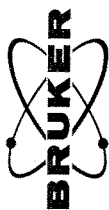

```

Current Data Parameters
Date_ 20060513
Time 17.54
INSTRUM spect
PROBHD 5 mm Multinucl
PULPROG zgpg30
SOLVENT DMSO
NS 289
DS 4
SWH 30030.025 Hz
FIDRES 0.456222 Hz
AQ 1.0912244 sec
RG 10321.3
DE 16.650 usec
TE 353.2 K sec
D1 2.00000000 sec
d11 0.03000000 sec
DELTA 1.89999996 sec
MCREST 0.00000000 sec
MCWRRK 0.01500000 sec

===== CHANNEL f1 =====
NUC1 13C
P1 13.00 usec
PL1 3.00 dB
SFO1 125.7427020 MHz

===== CHANNEL f2 =====
CPDPRG2 waltz16
NUC2 1H
P2 100.0 usec
PL2 1.00 dB
PL12 18.80 dB
PL13 120.00 dB
SFO2 500.0220001 MHz

F2 - Processing parameters
SI 32768
SF 125.7301290 MHz
WDW EM
SSB 0
LB 1.00 Hz
GB 0
PC 1.40
    
```

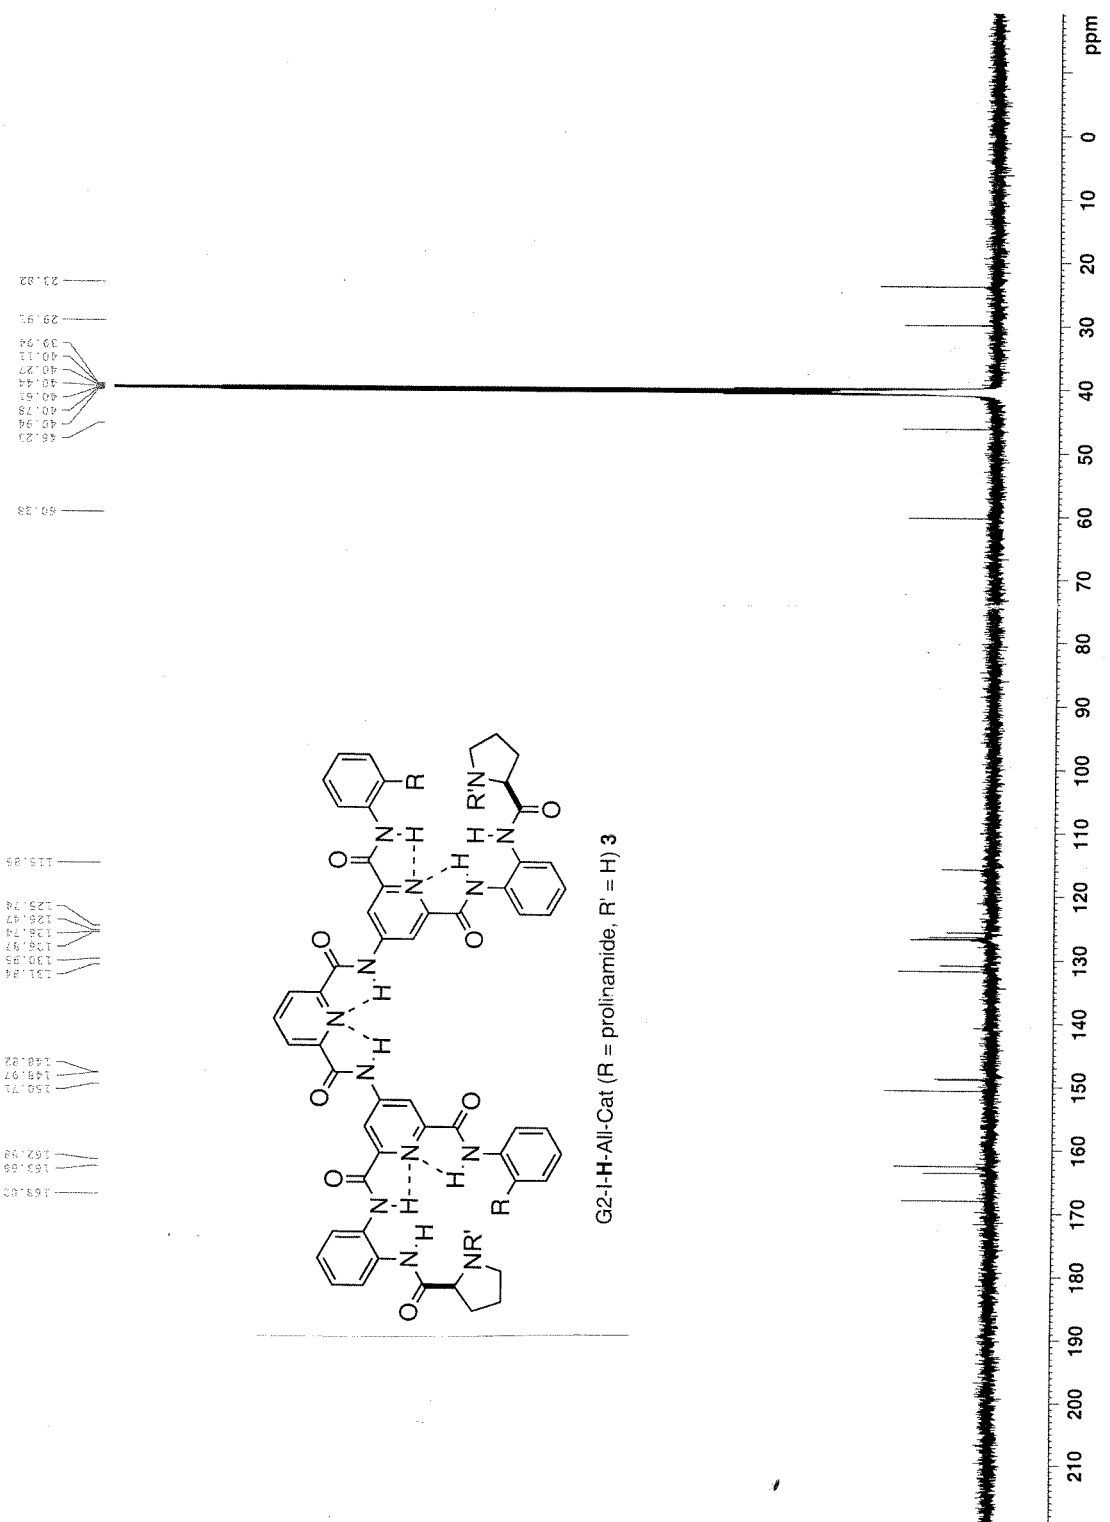

G2-1-H-All-Cat (R = prolinamide, R' = H) 3



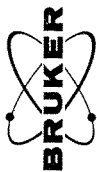

10.819  
10.789  
10.102  
9.102  
9.089  
9.084  
9.078  
9.073  
8.558  
8.539  
8.436  
8.418  
8.415  
8.397  
7.910  
7.908  
7.889  
7.795  
7.786  
7.781  
7.779  
7.771  
7.761  
7.749  
7.741  
7.739  
7.734  
7.725  
7.715  
7.475  
7.471  
7.456  
7.436  
7.380  
7.371  
7.362  
7.356  
7.347  
7.337  
7.241  
7.223  
7.204  
7.202  
4.367  
4.350  
4.345  
4.329  
3.172  
3.154  
3.144  
3.127  
3.112  
3.094  
3.084  
3.067  
2.517  
2.513  
2.508  
2.503  
2.499  
2.264  
2.243  
2.232  
2.211  
2.193  
2.130  
2.112  
2.095  
2.079  
2.062  
2.045  
1.753  
1.753

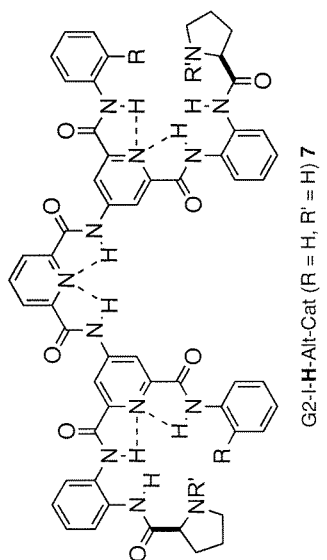

Current Data Parameters  
 Name Mono-G2-I-Cat  
 EXPNO 1  
 PROCNO 1  
 F2 - Acquisition Parameters  
 Date\_ 20070325  
 Time 0.37  
 INSTRUM spect  
 PROBHD 5 mm QNP 1H/13  
 PULPROG zg30  
 TD 65536  
 SOLVENT DMSO  
 NS 8  
 SFO 8276.142 Hz  
 SF 0.124314 Hz  
 FIDRES 3.958423 sec  
 RG 143.7  
 DW 60.400 usec  
 DE 6.00 usec  
 TE 353.2 K  
 D1 1.00000000 sec  
 MCREST 0.00000000 sec  
 MCMRK 0.01500000 sec  
 ===== CHANNEL f1 =====  
 NUC1 13  
 P1 13.0 usec  
 PL1 0.0 dB  
 SFO1 400.1324710 MHz  
 F2 - Processing parameters  
 SI 32768  
 SF 400.1300000 MHz  
 WDW EM  
 SSB 0  
 LB 0.30 Hz  
 GB 0  
 PC 1.40

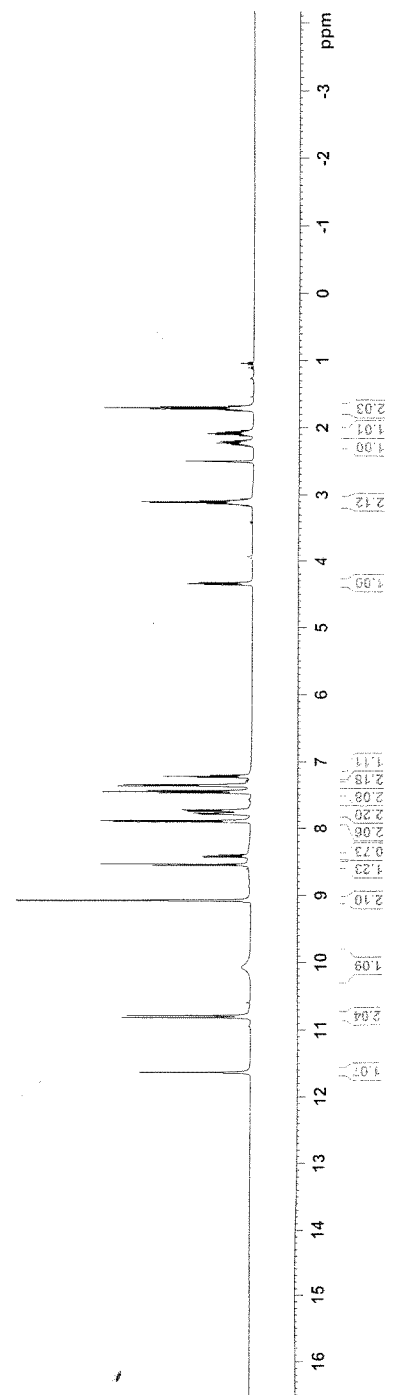

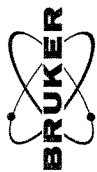

Current Data Parameters  
 NAME Mono-G2-H-Cat  
 PROCNO 1

F2 - Acquisition Parameters  
 Date\_ 20070325  
 Time\_ 1.24  
 INSTRUM spect  
 PROBDH 5 mm QNP 1H/13  
 PULPROG zgpg30  
 TD 65536  
 SOLVENT CDCl3  
 NS 14255  
 DS 4  
 SWH 23980.814 Hz  
 FIDRES 0.36918 Hz  
 AQ 1.366750 sec  
 RG 3850  
 DW 20.850 usec  
 DE 6.000 usec  
 TE 353.2 K  
 D1 2.00000000 sec  
 d11 0.03000000 sec  
 DELTA 1.89999988 sec  
 MCREST 0.00000000 sec  
 MCWRK 0.01500000 sec

===== CHANNEL f1 =====  
 NUC1 13C  
 P1 10.50 usec  
 PL1 0.00 dB  
 SFO1 100.628259 MHz

===== CHANNEL f2 =====  
 www.bruker.com CHANNEL f2  
 CPDPRG2 waltz16  
 NUC2 1H  
 PCPD2 80.00 usec  
 PL2 -6.00 dB  
 PL12 14.56 dB  
 PL13 120.00 dB  
 SFO2 400.1316995 MHz

F2 - Processing Parameters  
 SI 32768  
 SF 100.6128594 MHz  
 WDW EM  
 SSB 0  
 LB 1.00 Hz  
 GB 0  
 EC 1.40

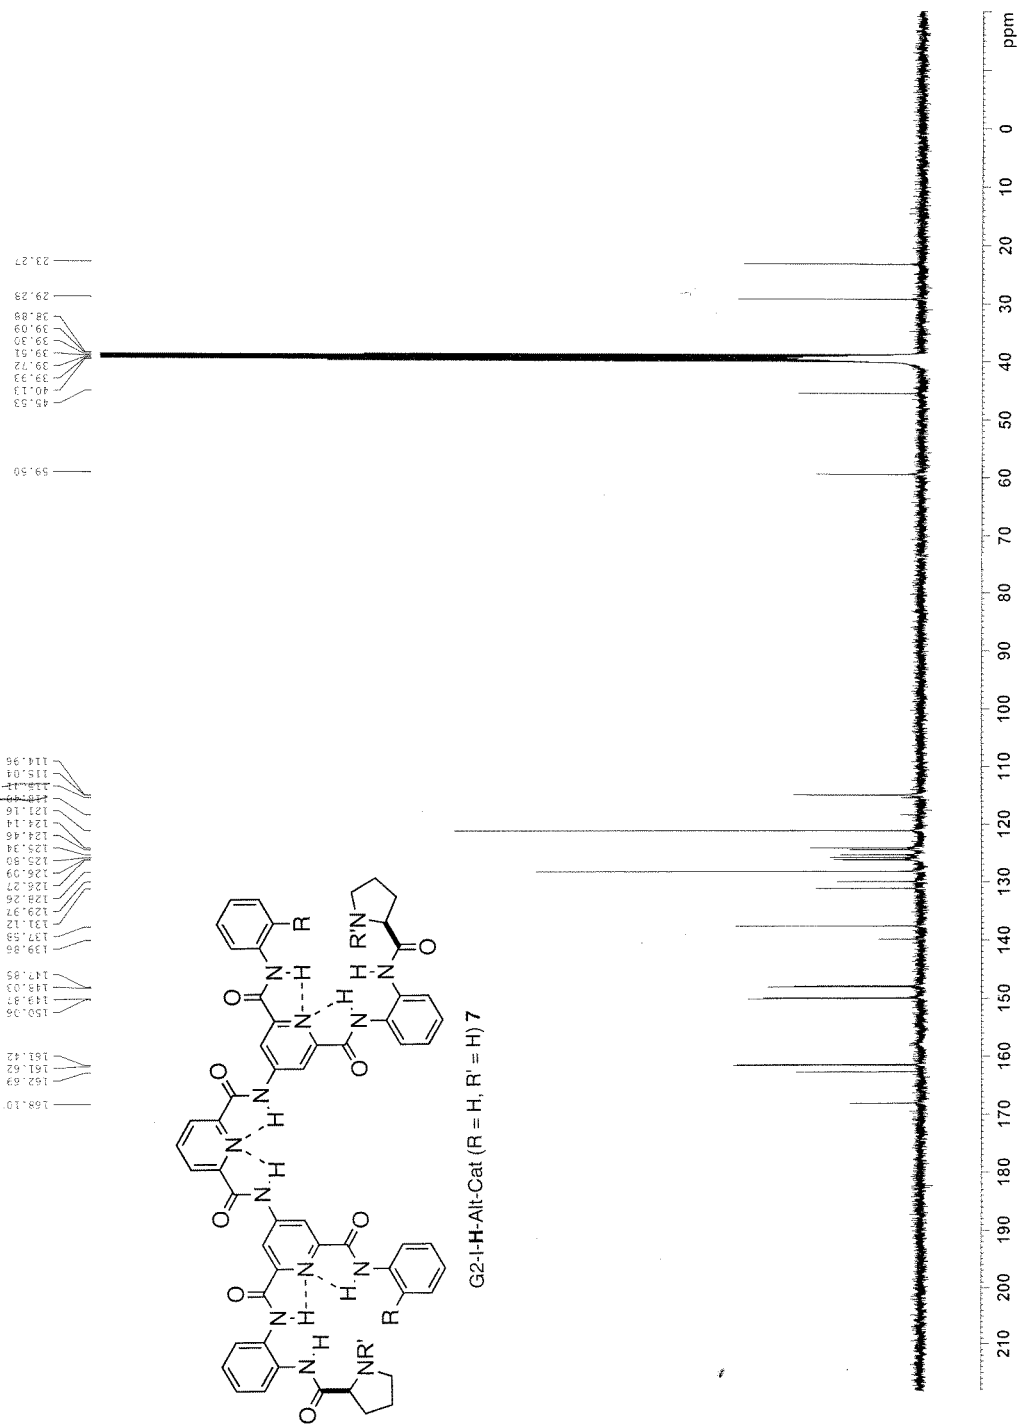

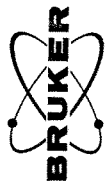

Current Data Parameters  
 NAME SAH-II-37  
 EXPNO 2  
 PROCNO 1

F2 - Acquisition Parameters  
 Date\_ 20050905  
 Time\_ 11.34  
 INSTRUM spect  
 PROBHD 5 mm Multinucl  
 PULPROG zg30  
 TD 32768  
 SOLVENT DMSO  
 NS 128  
 DS 0  
 SWH 8278.146 Hz  
 FIDRES 0.252629 Hz  
 AQ 1.9792372 sec  
 RG 645.1  
 DW 60.400 usec  
 DE 6.00 usec  
 TE 353.2 K  
 D1 2.00000000 sec  
 MCREST 0.00000000 sec  
 MCWREK 0.01500000 sec

\*\*\*\*\* CHANNEL f1 \*\*\*\*\*  
 NUC1 1H  
 P1 7.50 usec  
 PL1 -6.00 dB  
 SF01 400.1324710 MHz

F2 - Processing parameters  
 SI 16384  
 SF 400.1300064 MHz  
 WDW EM  
 SSB 0  
 LB 0.30 Hz  
 GB 0  
 FC 1.00

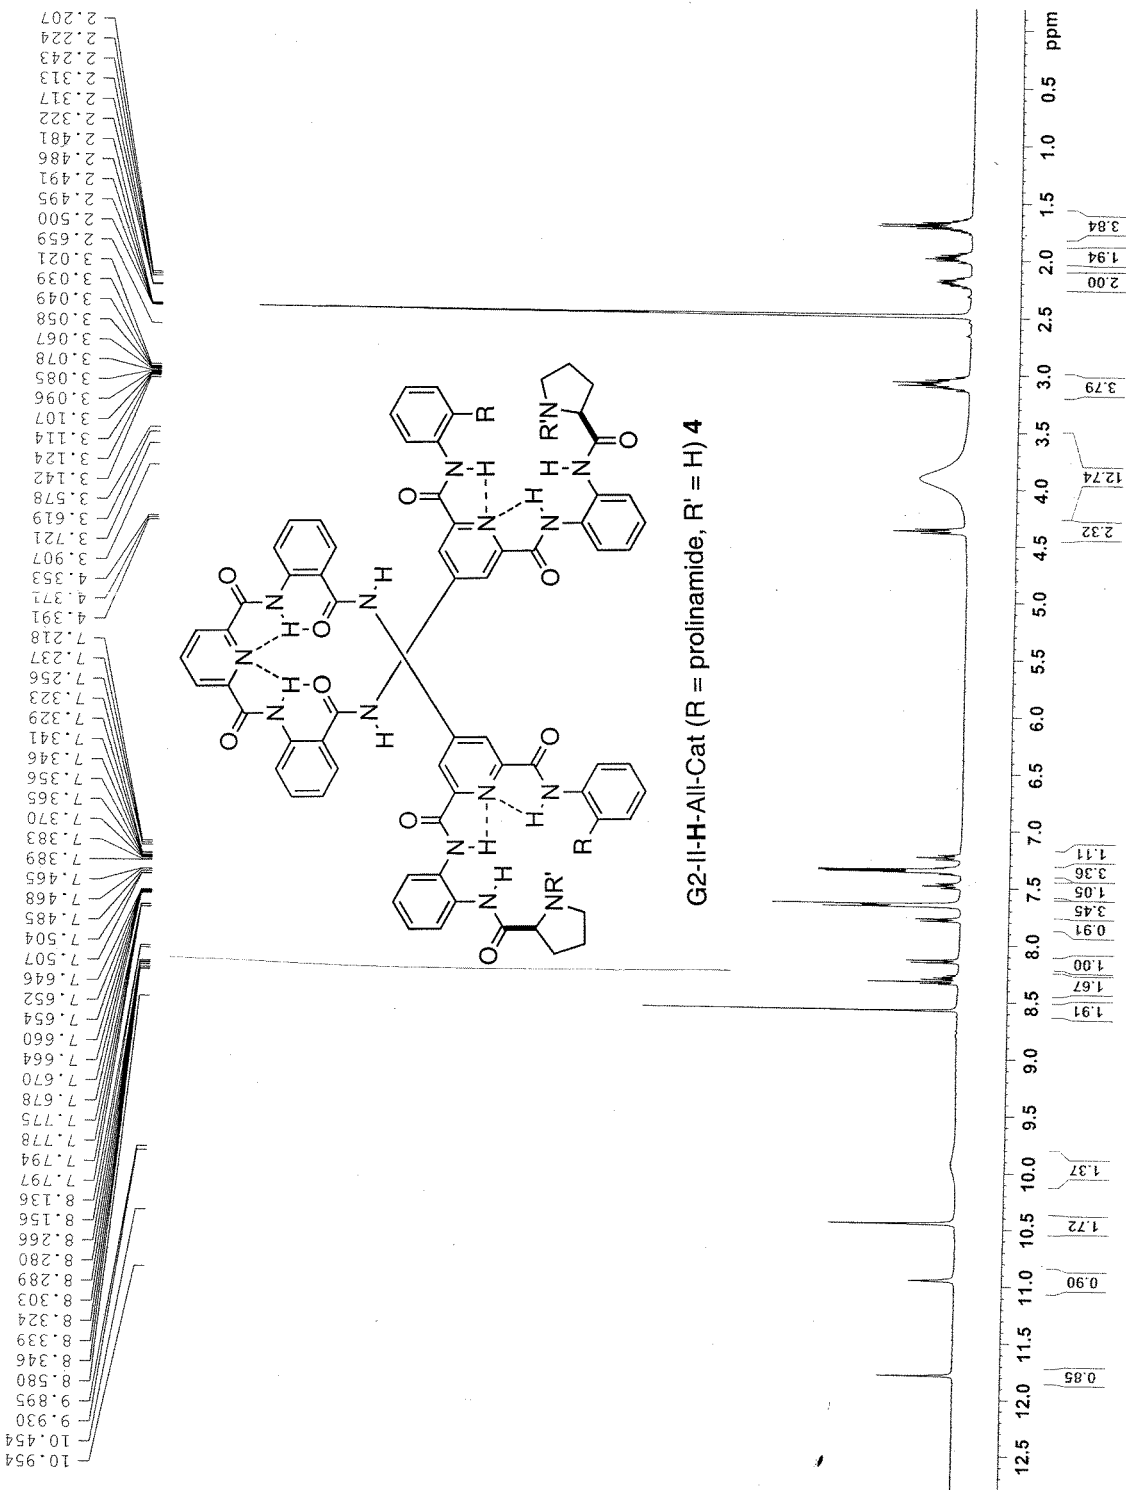

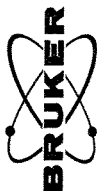

Current Data Parameters  
 NAME G2-II (11-37)  
 EXPNO 2  
 PROCNO 1

F2 - Acquisition Parameters  
 Date\_ 20060513  
 Time 16.11  
 NS 4096  
 DS 4  
 FIDRES 0.458222 Hz  
 AQ 1.091244 sec  
 RG 5160.6  
 DE 15.650 usec  
 TE 353.2 K  
 D1 2.0000000 sec  
 G11 0.0300000 sec  
 DELTA 1.8939388 sec  
 ACQ1 0.0100000 sec  
 ACQ2 0.0100000 sec  
 ACQ3 0.0100000 sec  
 MWRK 0.0100000 sec

===== CHANNEL f1 =====  
 NUC1 13C  
 P1 1.00 usec  
 PL1 1.00 dB  
 SFO1 125.7427020 MHz

===== CHANNEL f2 =====  
 CDFRG2 waltz16  
 NUC2 1H  
 PCPD2 100.00 usec  
 PL2 -1.00 dB  
 PL12 18.80 dB  
 PL13 130.00 dB  
 SFO2 500.0220001 MHz

F2 - Processing parameters  
 SI 32768  
 SF 125.7301250 MHz  
 KW EN  
 LB 0  
 GB 1.00 Hz  
 PC 1.40

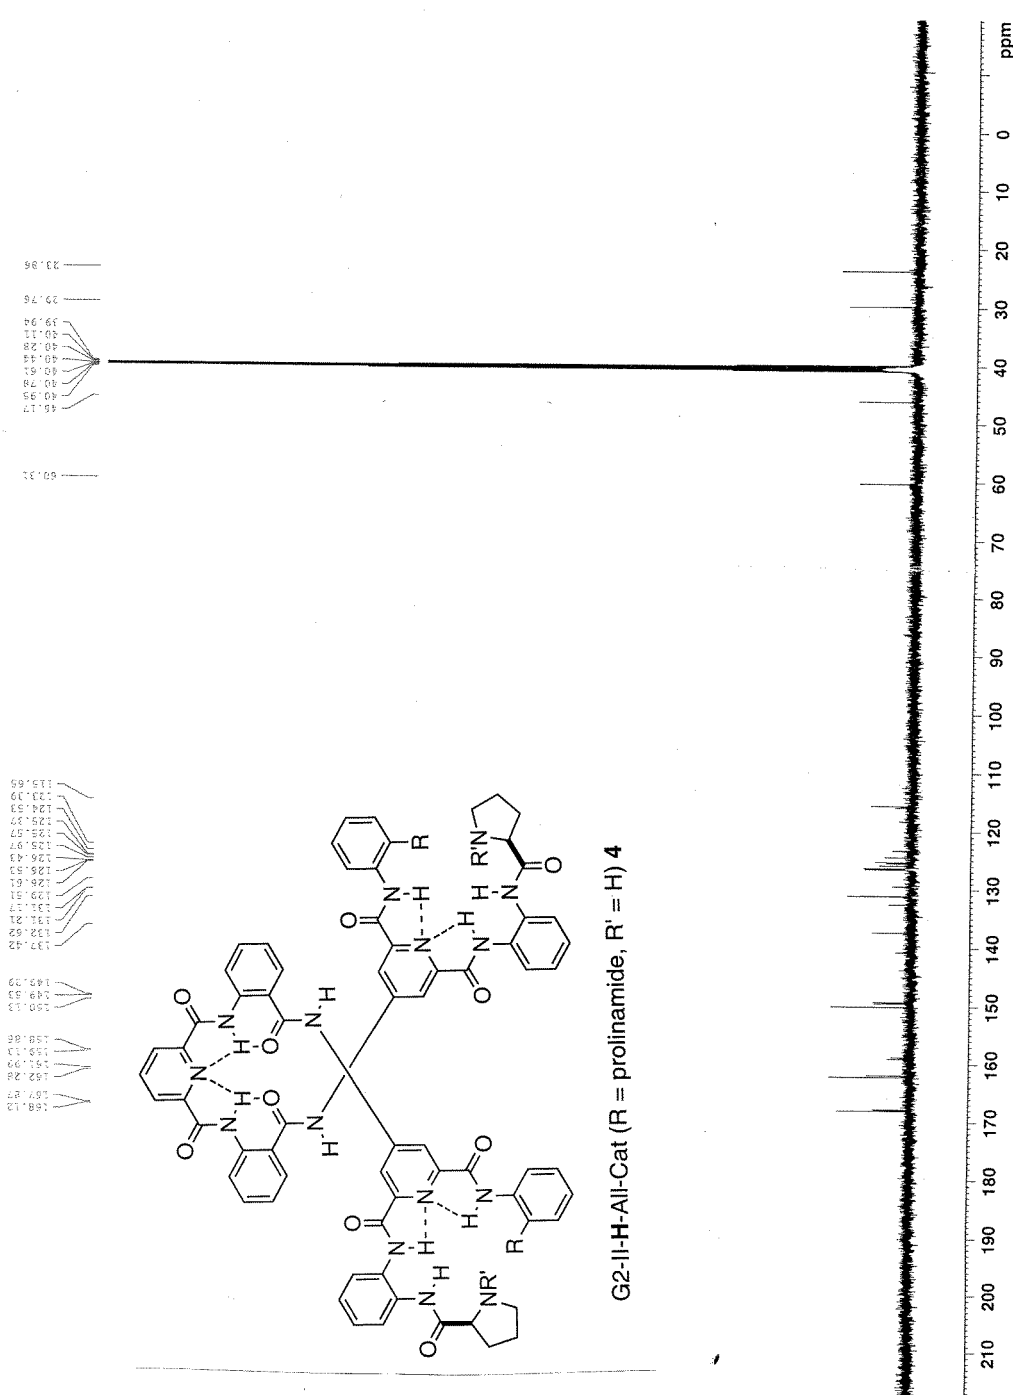

G2-II-H-All-Cat (R = prolinamide, R' = H) 4

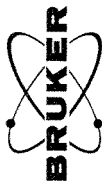

```

Current Data Parameters
NAME      Mono-G2-II-Cat
EXPNO    3
PROCNO   1

F2 - Acquisition Parameters
Date_    20070425
Time     8.23
INSTRUM  spect
PROBHD   5 mm QNP 1H/13
PULPROG  zg30
TD        65536
SOLVENT  CDCl3
NS        16
DS        2
SWH       8278.146 Hz
FIDRES    0.126314 Hz
AQ        3.9584243 sec
RG        143.7
DW        60.400 usec
DE        6.00 usec
TE        353.2 K
D1        1.00000000 sec
MCREST    0.00000000 sec
MCWRK     0.01500000 sec

***** CHANNEL f1 *****
NUC1      1H
P1        13.00 usec
PL1       0.00 dB
SFO1      400.1324710 MHz

F2 - Processing parameters
SI        32768
SF        400.1300000 MHz
WDW       EM
SSB       0
LB        0.30 Hz
GB        0
PC        1.40
    
```

8.427  
8.423  
8.420  
8.418  
8.406  
8.366  
8.350  
8.344  
8.328  
7.977  
7.958  
7.956  
7.831  
7.828  
7.811  
7.793  
7.791  
7.701  
7.698  
7.683  
7.678  
7.502  
7.484  
7.469  
7.468  
7.449  
7.430  
7.397  
7.393  
7.378  
7.374  
7.360  
7.354  
7.349  
7.335  
7.331  
7.316  
7.312  
7.227  
7.223  
7.221  
7.208  
7.204  
7.190  
7.187  
7.185  
7.182  
4.478  
4.458  
4.439  
3.229  
3.210  
3.201  
3.192  
3.183  
3.164  
3.154  
3.135  
3.126  
3.107  
3.090  
2.919  
2.915  
2.910  
2.505  
2.501  
2.365  
2.346  
2.330  
2.313  
2.297

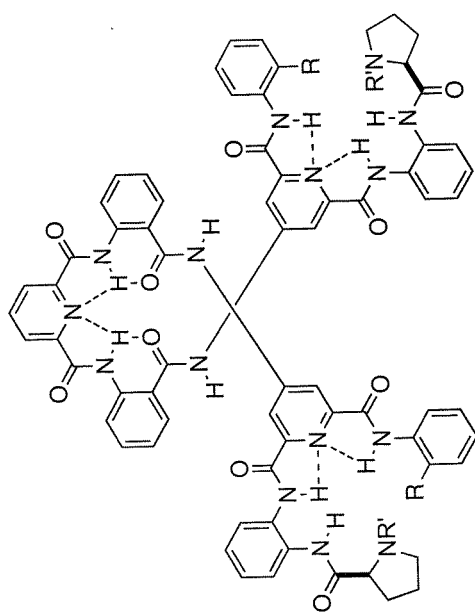

G2-II-H-Ait-Cat (R = H, R' = H) 8

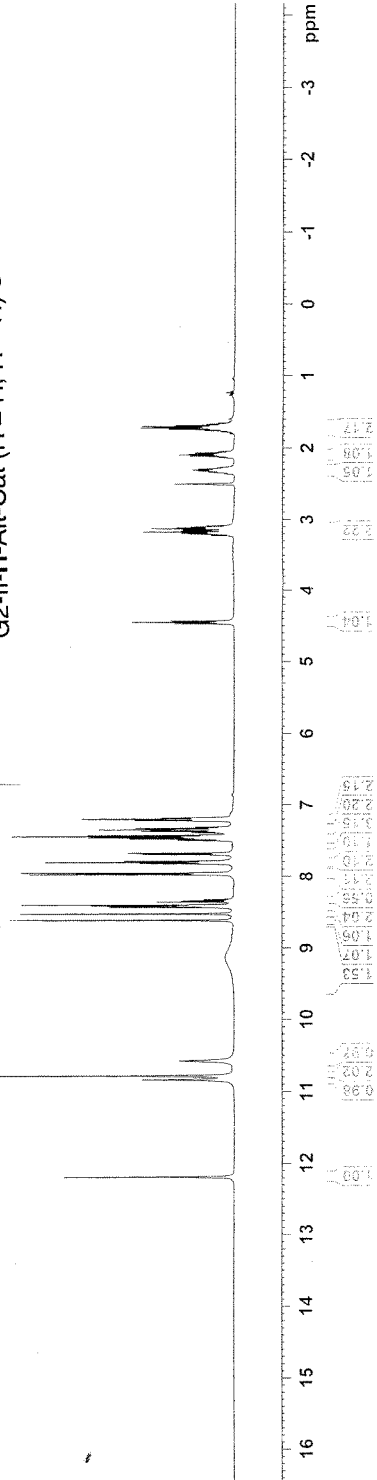

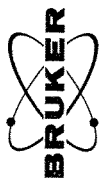

```

Current Data Parameters
NAME      Mono-G2-II-Cat
EXPNO    2
PROCNO   1

F2 - Acquisition Parameters
Date_    20070424
Time     21.23
INSTRUM  spect
PROBHD   5 mm QNP 1H/13
PULPROG  zgpg30
TD       65536
SOLVENT  DMSO
NS       11608
DS       4
SRH      23980.814 Hz
FIDRES   0.365918 Hz
AQ       1.3064756 sec
RG        4397.6
DW       20.850 usec
DE       6.00 usec
TE       300.2 K
D1       2.00000000 sec
d11      0.03000000 sec
DELTA    1.89999998 sec
MCREST   0.00000000 sec
MCWRK    0.01500000 sec

***** CHANNEL f1 *****
NUC1     13C
P1       10.50 usec
PL1      0.00 dB
SFO1     100.6282898 MHz

***** CHANNEL f2 *****
CPDPRG2  waltz16
NUC2     1H
PCPD2    80.00 usec
PL2      -6.00 dB
PL12     14.56 dB
PL13     120.00 dB
SFO2     400.1316005 MHz

F2 - Processing parameters
SI       32768
SF       100.6128587 MHz
WDW      EM
SSB      0
LB       1.00 Hz
GB       0
PC       1.40
    
```

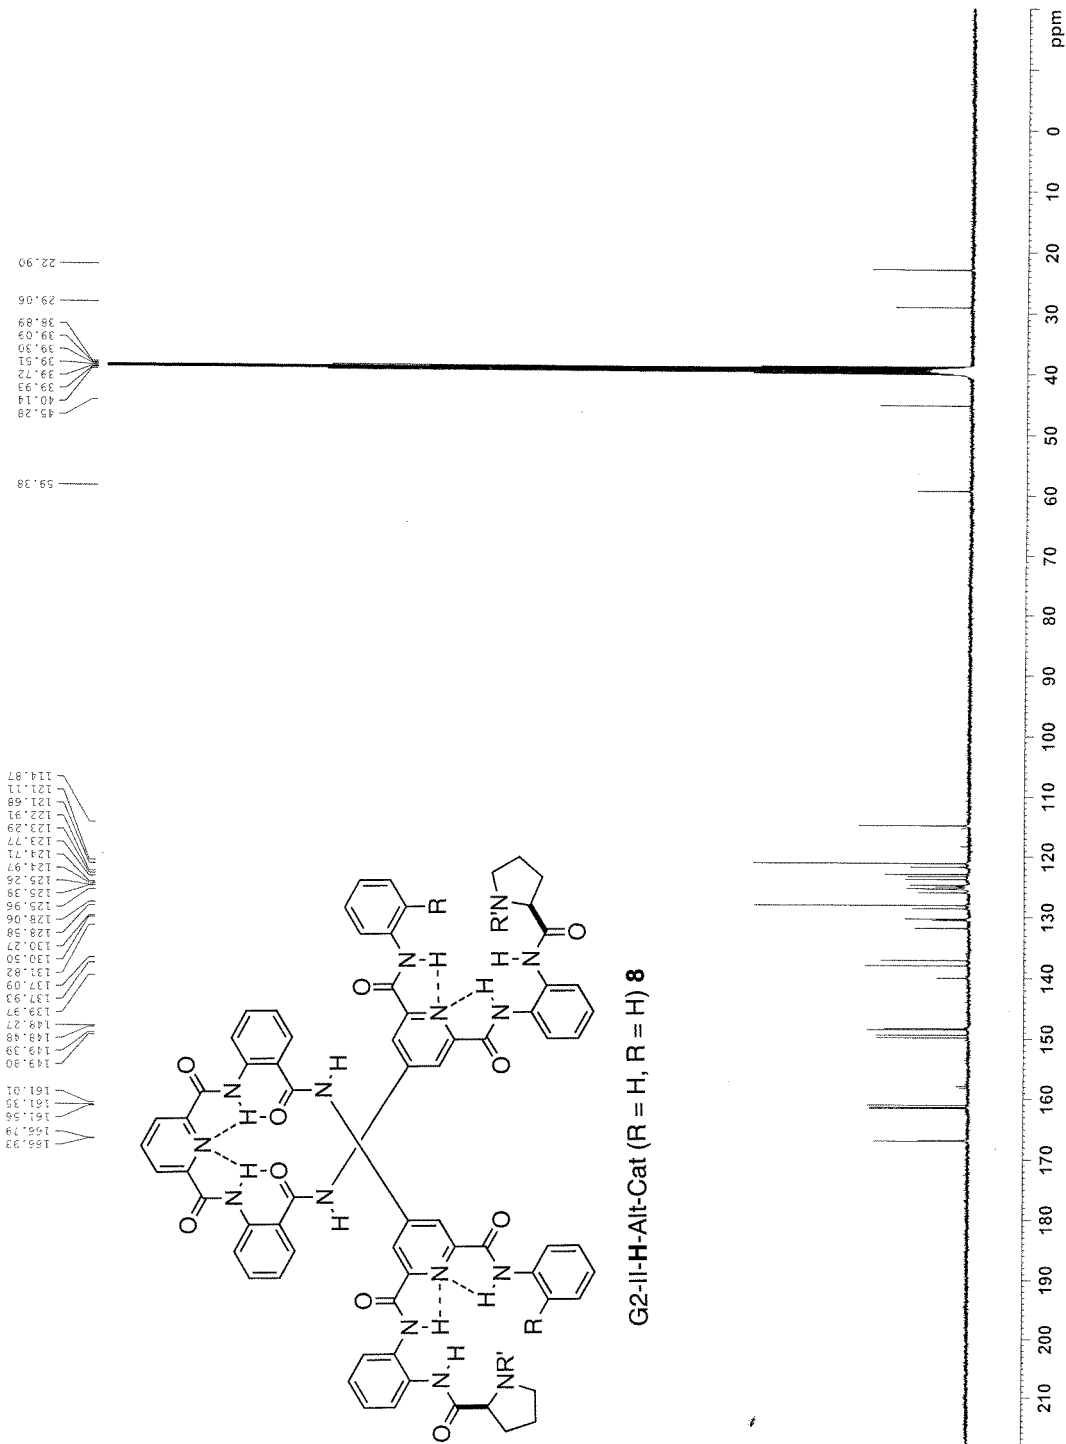

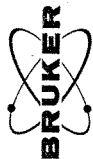

Current Data Parameters  
 Name Bis-63-I-Cat  
 ExpNO 2  
 F2ProcNO 1

F2 - Acquisition Parameters  
 Date\_ 20070604  
 Time\_ 23.05  
 INSTRUM spect  
 PROBDW 5 mm QNP 1H/13  
 TD 65536  
 TD0FROG 65536  
 SOLVENT CDCl3  
 NS 16  
 DS 2  
 SWH 8278.146 Hz  
 FIDRES 0.126314 Hz  
 AQ 3.9384243 sec  
 RG 114  
 CW 60.500 usec  
 DE 60.500 usec  
 TE 353.2 K  
 D1 1.00000000 sec  
 MCREST 0.00000000 sec  
 MCWRK 0.01500000 sec

===== CHANNEL f1 =====  
 NUC1 13C  
 P1 13.00 usec  
 PL1 0.00 dB  
 SF01 400.1324710 MHz

F2 - Processing parameters  
 SI 32768  
 SF 400.1300000 MHz  
 EQ 0  
 SSR 0  
 LB 0.30 Hz  
 GB 0  
 PC 1.00

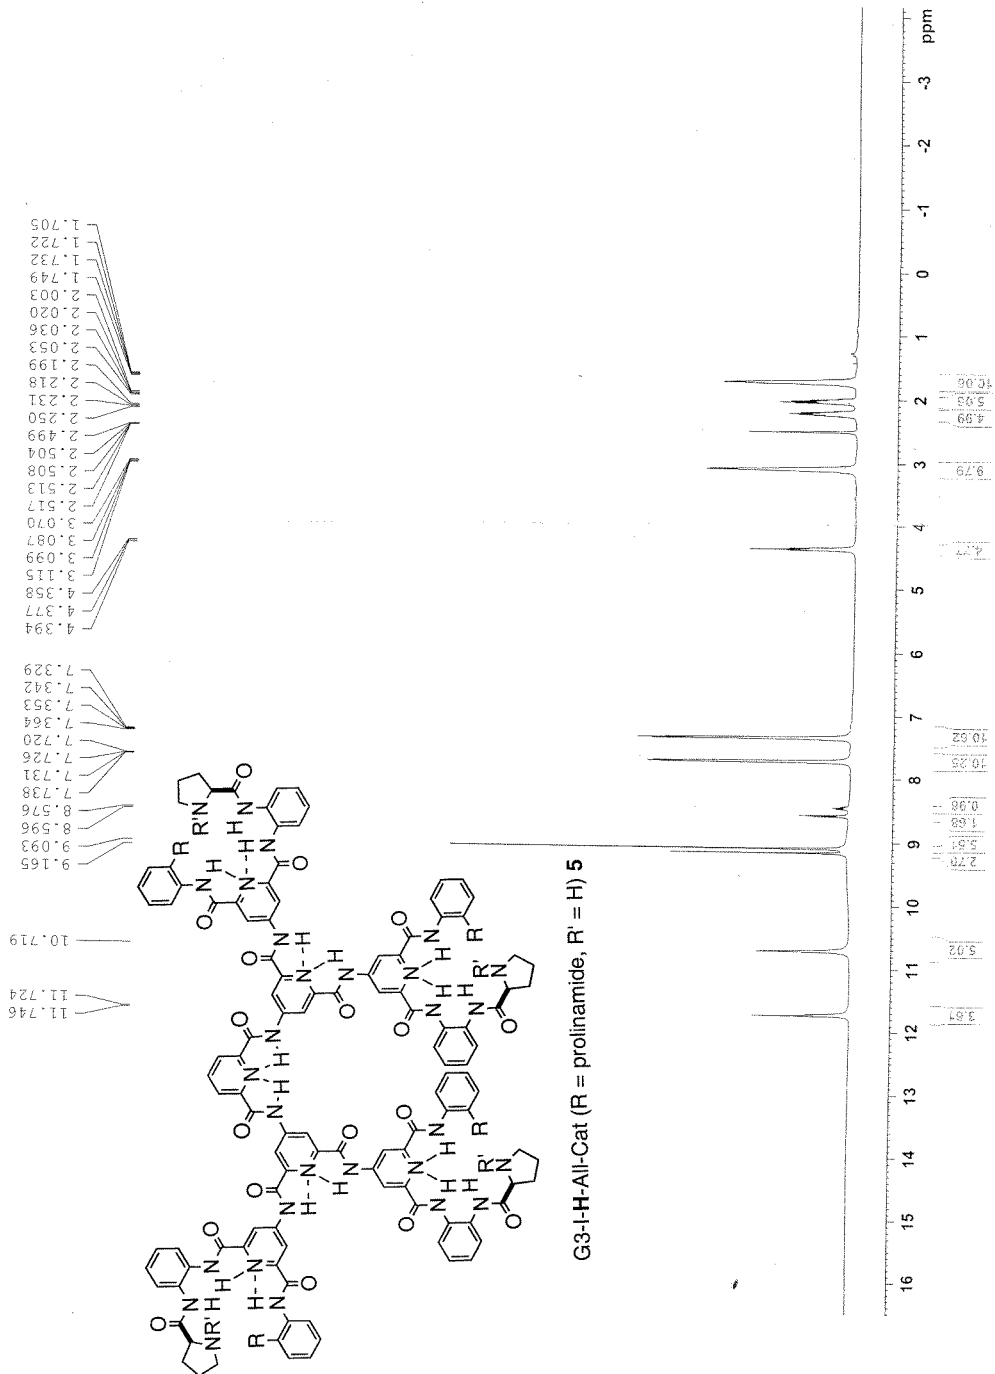

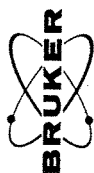

Current Data Parameters  
 NAME Bis-G3-I-Cat  
 EXPRO  
 PROCNO 1  
 F2 - Acquisition Parameters  
 Date\_ 20070601  
 Time\_ 23.14  
 INSTRUM spect  
 PROBRD 5 mm QNP 1H/13  
 PULPROG zgpg30  
 TD 65536  
 SOLVENT CDCl3  
 NS 10000  
 DS 4  
 SWH 23980.814 Hz  
 FIDRES 0.365918 Hz  
 AQ 1.3664756 sec  
 RG 4597.6  
 DW 20.850 usec  
 DE 3.000 usec  
 TE 300.2 K  
 D1 2.00000000 sec  
 d11 0.03000000 sec  
 DELTA 1.89999998 sec  
 MCREST 0.00000000 sec  
 MCWRK 0.01500000 sec  
 ===== CHANNEL f1 =====  
 NUC1 13C  
 P1 10.50 usec  
 PL1 0.00 dB  
 SFO1 100.6228299 MHz  
 ===== CHANNEL f2 =====  
 CPDPRG2 waltz16  
 NUC2 13C  
 P2 80.00 usec  
 PL2 -6.00 dB  
 PL12 14.56 dB  
 PL13 120.00 dB  
 SFO2 400.1316005 MHz  
 F2 - Processing parameters  
 SI 32768  
 SF 100.6128572 MHz  
 MDW EM  
 SSB 0  
 LB 1.00 Hz  
 GB 0  
 PC 1.40

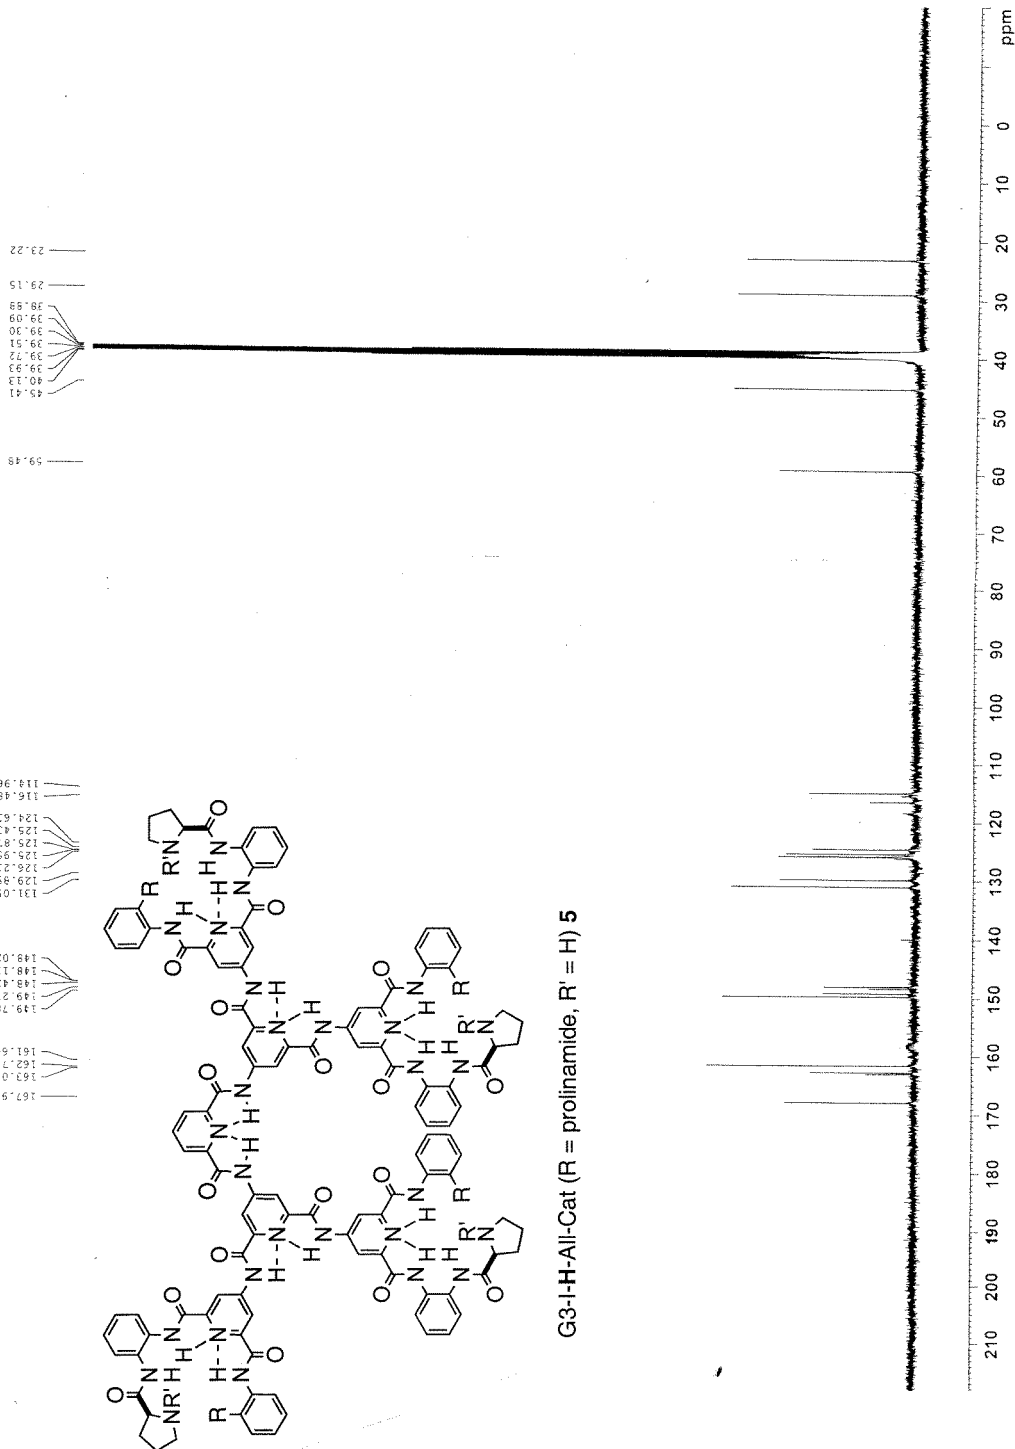

G3-I-H-All-Cat (R = prolinamide, R' = H) 5





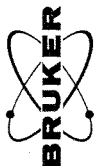

Current Data Parameters  
 NAME Mono-G3-Cat  
 EXPNO 6  
 PROCNO 1

F2 - Acquisition Parameters  
 Date\_ 20070402  
 Time 17.20  
 INSTRUM spect  
 PROBHD 5 mm QNP 1H/13  
 PULPROG zgpg30  
 TD 65536  
 SOLVENT CDCl3  
 NS 16776  
 DS 4  
 SWH 23980.814 Hz  
 FIDRES 0.365918 Hz  
 AQ 1.3664756 sec  
 RG 5160.6  
 DW 20.850 usec  
 DE 36.00 usec  
 TE 300.2 K  
 D1 2.0000000 sec  
 d11 0.0300000 sec  
 DELTA 1.8999998 sec  
 MCREST 0.0000000 sec  
 MCHRK 0.0150000 sec

===== CHANNEL f1 =====  
 NUC1 13C  
 P1 10.50 usec  
 PL1 0.00 dB  
 .FO1 100.628298 MHz

===== CHANNEL f2 =====  
 CPDPRG2 waltz16  
 NUC2 1H  
 PCPD2 80.00 usec  
 PL2 -6.00 dB  
 PL12 14.56 dB  
 PL13 120.00 dB  
 SFO2 400.1316005 MHz

F2 - Processing parameters  
 SI 32768  
 SF 100.6128704 MHz  
 WDW EM  
 SSB 0  
 LB 1.00 Hz  
 GB 0  
 PC 1.40

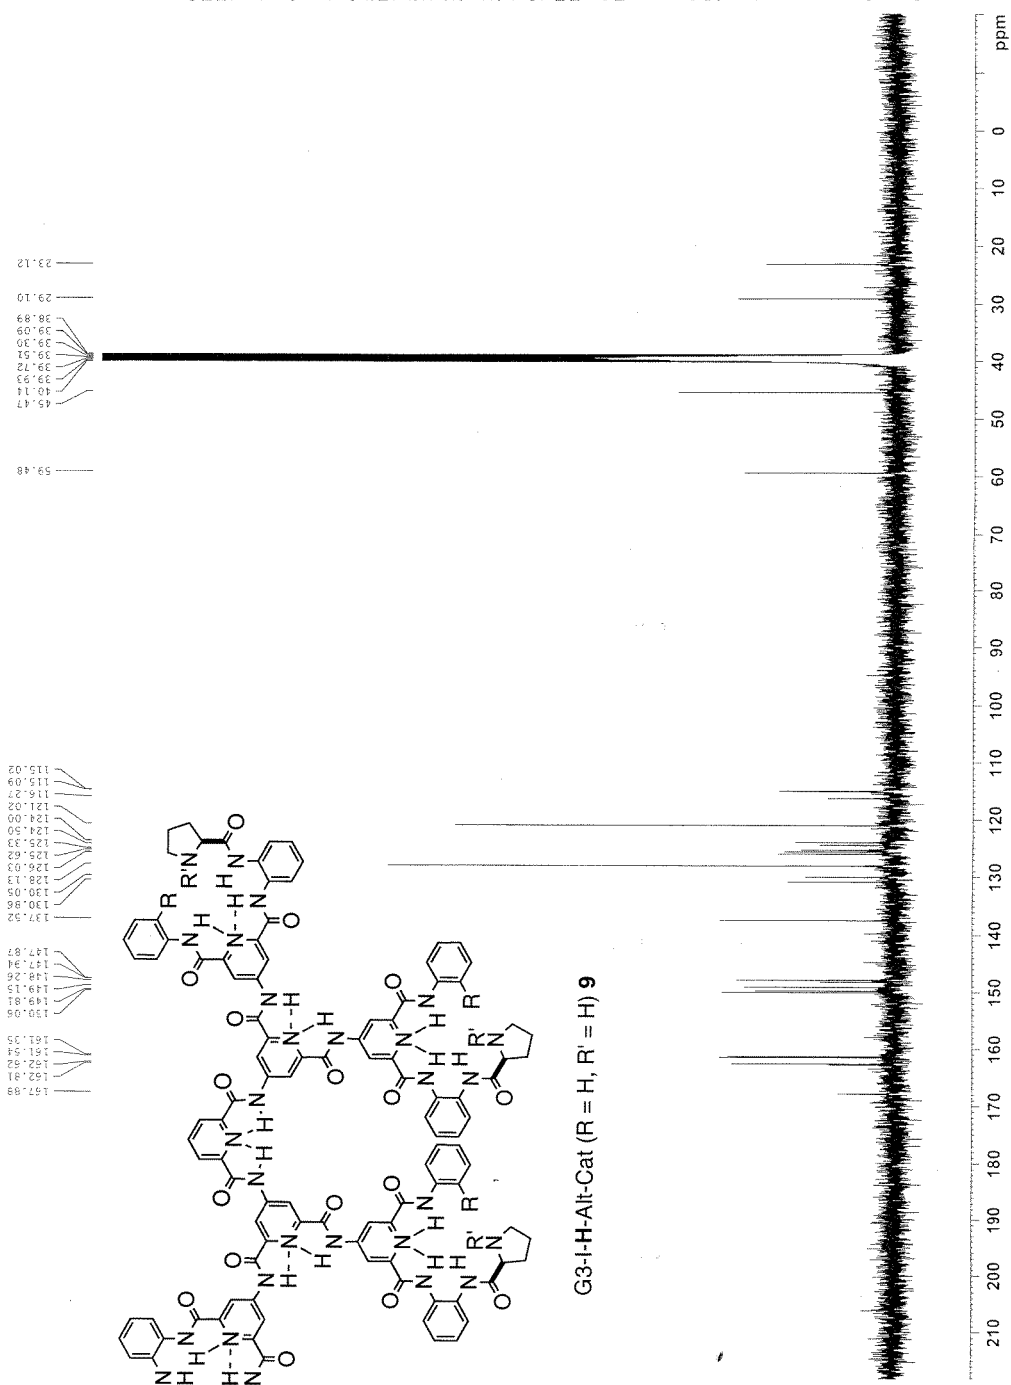

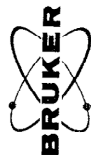

Current Data Parameters  
NAME Bis-Gl-Benzylamine  
EXNO 2  
PROCNO 1  
F2 - Acquisition Parameters  
Date\_ 20090625  
Time\_ 20.06  
INSTRUM spect  
PROBHD 5 mm QNP 1H/13  
PULPROG zgpg30  
TD 65536  
SOLVENT CDCl3  
NS 1  
DS 2  
SWH 8278.146 Hz  
FIDRES 0.126314 Hz  
AQ 3.9384243 sec  
RG 45.3  
EW 60.400 usec  
TE 300.2 K  
TEP 300.2 K  
C1 1.00002000 sec  
MCRETN 0.00003000 sec  
MCRBK 0.01500000 sec  
===== CHANNEL f1 =====  
NUC1 13C  
PULPROG zgpg30  
TD 65536  
SOLVENT CDCl3  
SFO1 400.1324710 MHz  
F2 - Processing parameters  
SI 32768  
SF 400.1300000 MHz  
WDW EM  
SSB 0  
LB 0.30 Hz  
GB 0  
PC 1.00

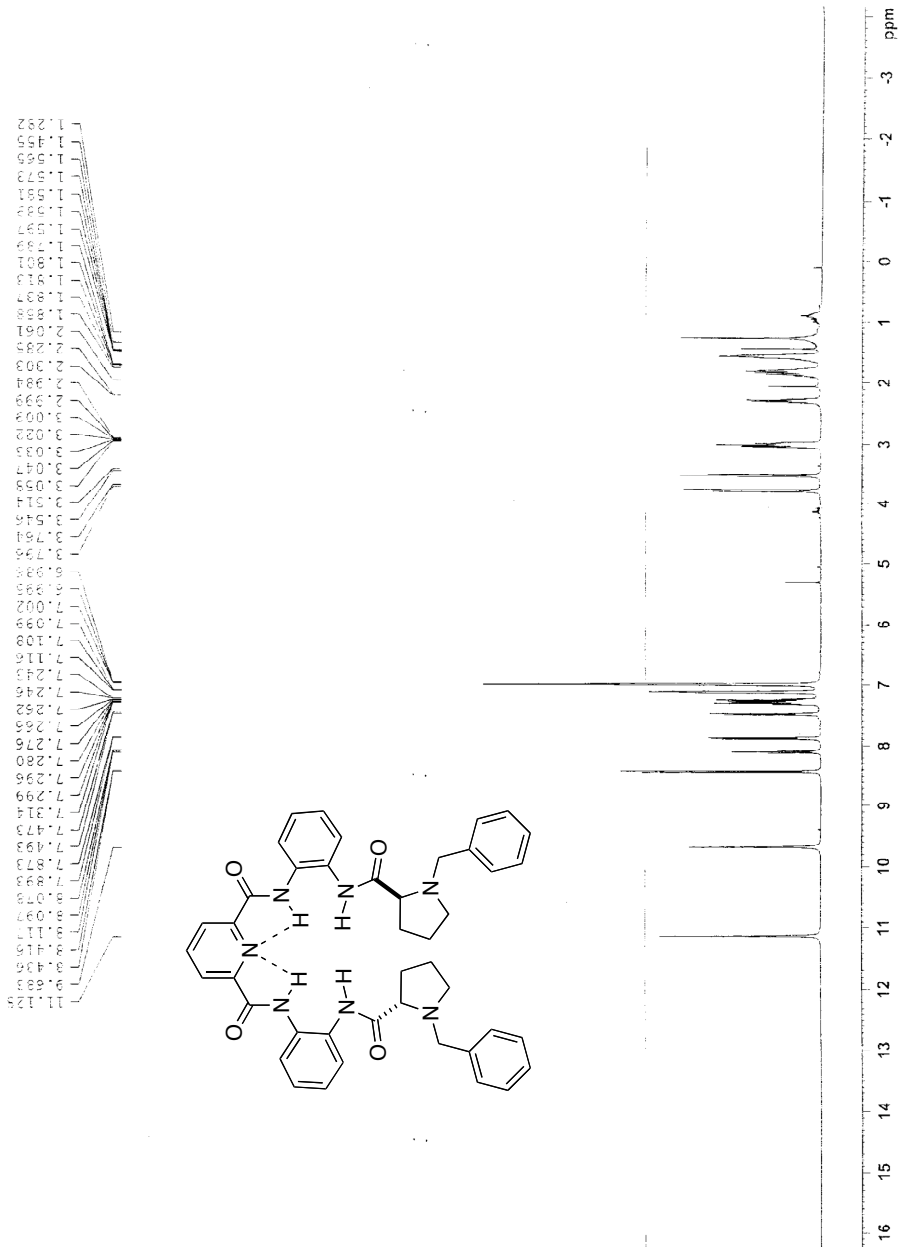





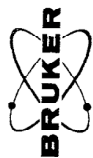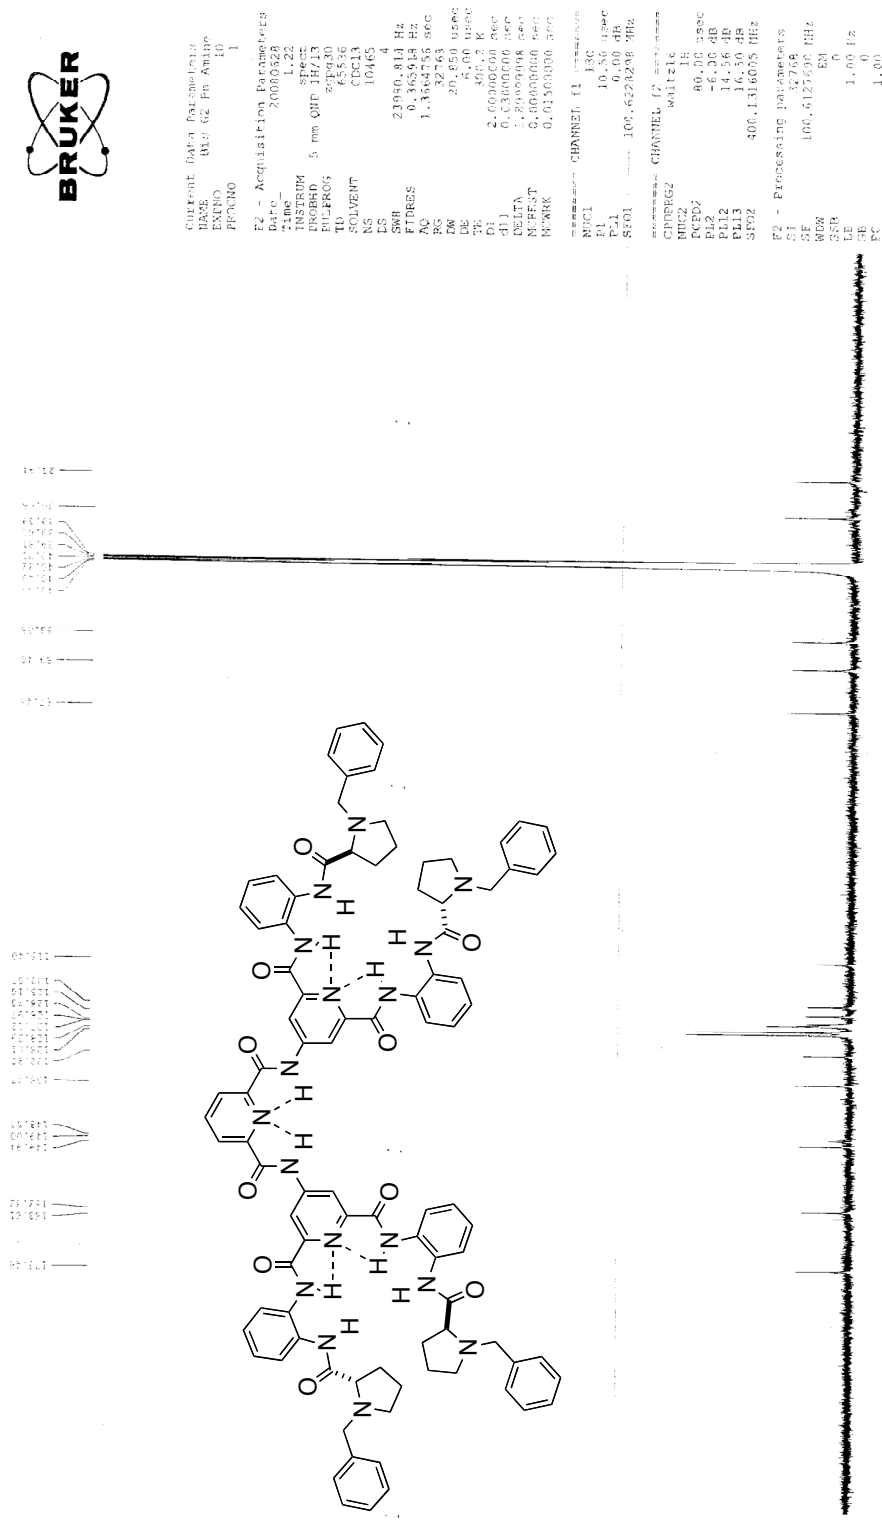

## Computational Methods

The CD spectrum was calculated at the TD-B3LYP/SV(P) level of theory and using the X-ray crystallographic geometry. A 0.2 eV Gaussian line-broadening was applied to each excitation and the spectrum was blue-shifted by 0.4 eV. The spectrum was normalized to match the intensity of the 305 nm peak. This procedure is supported by previous work on theoretical CD predictions, which have demonstrated good agreement with experiment.<sup>4</sup>

The theoretical and experimental spectra are in good agreement, particularly between 280 and 350 nm. The predicted CD underestimates the quantity of negative polarization from 225-275 nm, but qualitatively matches the peak and valley of the experimental spectrum between 220-230 nm. To further validate the assignment of helicity in solution, stochastic sampling methods were used to obtain the *M* helical isomer that best matches the *P* helical crystal structure, while retaining the stereochemistry of the prolinamides. CD spectrum calculations on the *M* helical geometry exhibited a negative excitonic couplet centered at 300 nm, opposite of the experimental and calculated *P* helical sense, supporting the finding that the *P* helical sense is dominant in solution.

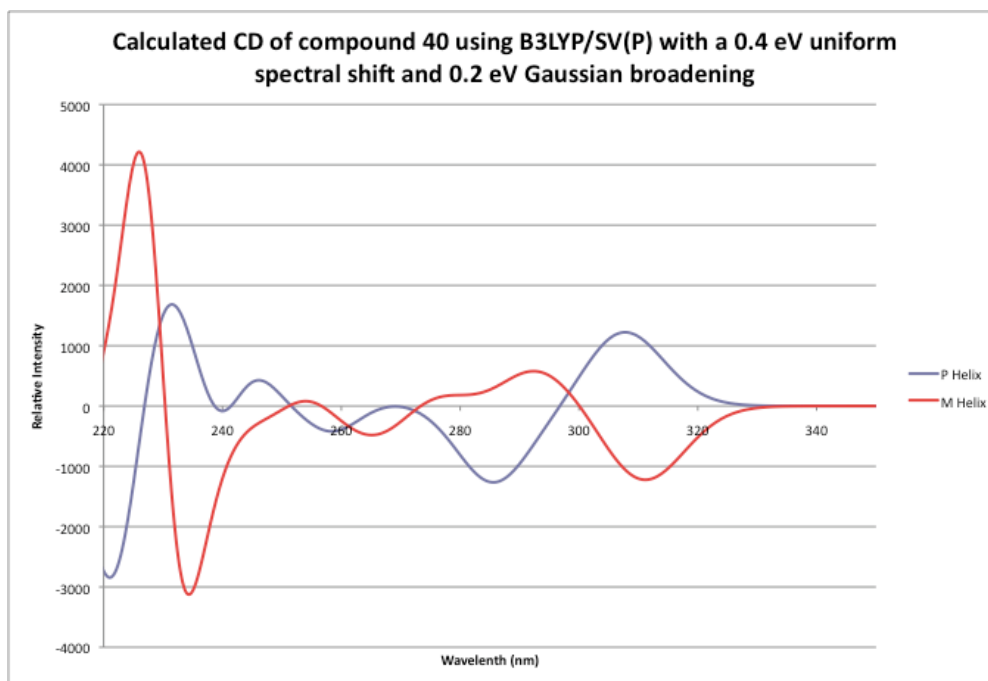

## X-ray Crystallography Details

### G1-all (SI-40)

Parquette 1673

The colorless crystal used for data collection was approximately a square plate. Examination of the diffraction pattern on a Nonius Kappa CCD diffractometer indicated a monoclinic crystal system. All work was done at 150 K using an Oxford Cryosystems Cryostream Cooler. The data collection strategy was set up to measure a quadrant of reciprocal space with a redundancy factor of 3.9, which means that 90% of the reflections were measured at least 3.9 times. Phi and omega scans with a frame width of 1.0° were used. Data integration was done with Denzo(1), and scaling and merging of the data was done with Scalepack(1). Merging the data and averaging the symmetry equivalent reflections resulted in an Rint value of 0.039.

The structure was solved by the direct methods procedure in SHELXS-97(2). Full-matrix least-squares refinements based on  $F^2$  were performed in SHELXL-97(3), as incorporated in the WinGX package(4). The correct enantiomer was chosen based on the known chiral carbon atoms.

The hydrogen atoms bonded to N(3) and N(6) were refined isotropically. For the hydrogen atoms bonded to N(2) and N(5), only their positional parameters were refined. The remaining hydrogen atoms were included in the model at calculated positions using a riding model with  $U(H) = 1.2 * U_{eq}(\text{attached atom})$ . The final refinement cycle was based on 6616 intensities and 501 variables, and resulted in agreement factors of  $R1(F) = 0.049$  and  $wR2(F^2) = 0.078$ . For the subset of data with  $I > 2 * \sigma(I)$ , the  $R1(F)$  value is 0.035 for 5611 reflections. The final difference electron density map contains maximum and minimum peak heights of 0.15 and -0.15 e/Å<sup>3</sup>. Neutral atom scattering factors were used and include terms for anomalous dispersion(5).

All four of the N-H groups are involved in intramolecular hydrogen bonds.

### References

- (1) DENZO: Otwinowski, Z. & Minor, W., *Methods in Enzymology*, Vol 276: *Macromolecular Crystallography, part A*, 307-326, (1997), Carter, Jr., C. W. & Sweet, R. M., Eds., Academic Press.
- (2) SHELXS-97: Sheldrick, G. M., *Acta Cryst.*, (2008), A64, 112-122.
- (3) SHELXL-97: Sheldrick, G. M., *Acta Cryst.*, (2008), A64, 112-122.
- (4) WinGX-Version 1.64.05: Farrugia, L. J., *J. Appl. Cryst.*, (1999), 32, 837-838.
- (5) *International Tables for Crystallography* (1992). Volume C. Dordrecht: Kluwer Academic Publishers.



### Crystallographic details for Parquette G1-all (SI-40)

|                                   |                                                                            |
|-----------------------------------|----------------------------------------------------------------------------|
| Formula                           | C <sub>43</sub> H <sub>43</sub> N <sub>7</sub> O <sub>4</sub>              |
| Formula weight                    | 721.84                                                                     |
| Temperature                       | 150(2) K                                                                   |
| Wavelength                        | 0.71073 Å                                                                  |
| Crystal system                    | monoclinic                                                                 |
| Space group                       | P2 <sub>1</sub>                                                            |
| Unit cell dimensions              | a = 9.7376(1) Å<br>b = 18.8927(2) Å<br>c = 10.8852(1) Å<br>β = 108.797(1)° |
| Volume                            | 1895.74(3) Å <sup>3</sup>                                                  |
| Z                                 | 2                                                                          |
| Density (calculated)              | 1.265 Mg/m <sup>3</sup>                                                    |
| Absorption coefficient            | 0.083 mm <sup>-1</sup>                                                     |
| F(000)                            | 764                                                                        |
| Crystal size                      | 0.08 x 0.19 x 0.21 mm <sup>3</sup>                                         |
| Theta range for data collection   | 2.16 to 24.99°                                                             |
| Index ranges                      | -11 ≤ h ≤ 11, -21 ≤ k ≤ 22, -12 ≤ l ≤ 12                                   |
| Reflections collected             | 28888                                                                      |
| Independent reflections           | 6616 [R(int) = 0.039]                                                      |
| Completeness to theta = 24.99°    | 99.9 %                                                                     |
| Refinement method                 | Full-matrix least-squares on F <sup>2</sup>                                |
| Data / restraints / parameters    | 6616 / 1 / 501                                                             |
| Goodness-of-fit on F <sup>2</sup> | 1.039                                                                      |
| Final R indices [I > 2σ(I)]       | R <sub>1</sub> = 0.0352, wR <sub>2</sub> = 0.0734                          |
| R indices (all data)              | R <sub>1</sub> = 0.0486, wR <sub>2</sub> = 0.078                           |
| Largest diff. peak and hole       | 0.148 and -0.154 e/Å <sup>3</sup>                                          |

## G1-alt (6)

The crystal used for data collection was a colorless chunk. Examination of the diffraction pattern on a Nonius Kappa CCD diffractometer indicated a monoclinic crystal system. All work was done at 150 K using an Oxford Cryosystems Cryostream Cooler. The data collection strategy was set up to measure a quadrant of reciprocal space with a redundancy factor of 4.0, which means that 90% of the reflections were measured at least 4.0 times. Phi and omega scans with a frame width of 2.0° were used. Data integration was done with Denzo(1), and scaling and merging of the data was done with Scalepack(1). Merging the data and averaging the symmetry equivalent reflections resulted in an Rint value of 0.040.

The structure was solved by the direct methods procedure in SHELXS-97(2). Full-matrix least-squares refinements based on  $F^2$  were performed in SHELXL-97(3), as incorporated in the WinGX package(4). The correct enantiomer was chosen based on the known chiral carbon atom.

The hydrogen atoms bonded to atoms N(2), N(3), N(4) and N(5) were refined isotropically. The remaining hydrogen atoms were included in the model at calculated positions using a riding model with  $U(H) = 1.2 * U_{eq}(\text{attached atom})$ . The final refinement cycle was based on 4813 intensities and 305 variables, and resulted in agreement factors of  $R1(F) = 0.056$  and  $wR2(F^2) = 0.081$ . For the subset of data with  $I > 2 * \sigma(I)$ , the  $R1(F)$  value is 0.036 for 3866 reflections. The final difference electron density map contains maximum and minimum peak heights of 0.19 and -0.24 e/Å<sup>3</sup>. Neutral atom scattering factors were used and include terms for anomalous dispersion(5).

All four of the N-H groups are involved in inter or intramolecular hydrogen bonds (see table).

### References

- (1) DENZO: Otwinowski, Z. & Minor, W., *Methods in Enzymology*, Vol 276: *Macromolecular Crystallography, part A*, 307-326, (1997), Carter, Jr., C. W. & Sweet, R. M., Eds., Academic Press.
- (2) SHELXS-97: Sheldrick, G. M., *Acta Cryst.*, (2008), A64, 112-122.
- (3) SHELXL-97: Sheldrick, G. M., *Acta Cryst.*, (2008), A64, 112-122.
- (4) WinGX-Version 1.64.05: Farrugia, L. J., *J. Appl. Cryst.*, (1999), 32, 837-838.
- (5) *International Tables for Crystallography* (1992). Volume C. Dordrecht: Kluwer Academic Publishers.

### Crystallographic details for Parquette G1-alt (6)

|                                   |                                                                          |
|-----------------------------------|--------------------------------------------------------------------------|
| Formula                           | C <sub>24</sub> H <sub>23</sub> N <sub>5</sub> O <sub>3</sub>            |
| Formula weight                    | 429.47                                                                   |
| Temperature                       | 150(2) K                                                                 |
| Wavelength                        | 0.71073 Å                                                                |
| Crystal system                    | monoclinic                                                               |
| Space group                       | P2 <sub>1</sub>                                                          |
| Unit cell dimensions              | a = 9.1013(1) Å<br>b = 12.5045(2) Å<br>c = 9.5586(2) Å<br>β = 98.496(1)° |
| Volume                            | 1075.90(3) Å <sup>3</sup>                                                |
| Z                                 | 2                                                                        |
| Density (calculated)              | 1.326 Mg/m <sup>3</sup>                                                  |
| Absorption coefficient            | 0.090 mm <sup>-1</sup>                                                   |
| F(000)                            | 452                                                                      |
| Crystal size                      | 0.27 x 0.27 x 0.38 mm <sup>3</sup>                                       |
| Theta range for data collection   | 2.70 to 27.47°                                                           |
| Index ranges                      | -11 ≤ h ≤ 11, -16 ≤ k ≤ 15, -12 ≤ l ≤ 12                                 |
| Reflections collected             | 23526                                                                    |
| Independent reflections           | 4813 [R(int) = 0.040]                                                    |
| Completeness to theta = 27.47°    | 99.8 %                                                                   |
| Refinement method                 | Full-matrix least-squares on F <sup>2</sup>                              |
| Data / restraints / parameters    | 4813 / 1 / 305                                                           |
| Goodness-of-fit on F <sup>2</sup> | 1.071                                                                    |
| Final R indices [I > 2σ(I)]       | R1 = 0.0365, wR2 = 0.0748                                                |
| R indices (all data)              | R1 = 0.0557, wR2 = 0.0807                                                |
| Largest diff. peak and hole       | 0.189 and -0.236 e/Å <sup>3</sup>                                        |

## J. References

- (1) Tang, Z.; Jiang, F.; Yu, L.-T.; Cui, X.; Gong, L.-Z.; Mi, A.-Q.; Jiang, Y.-Z.; Wu, Y.-D. *J. Am. Chem. Soc.* **2003**, *125*, 5262-5263.
- (2) Tang, Z.; Jiang, F.; Cui, X.; Gong, L.-Z.; Mi, A.-Q.; Jiang, Y.-Z.; Wu, Y.-D. *Proc. Natl. Acad. Sci. U.S.A.* **2004**, *101*, 5755-5760.
- (3) Tang, Z.; Yang, Z.-H.; Chen, X.-H.; Cun, L.-F.; Mi, A.-Q.; Jiang, Y.-Z.; Gong, L.-Z. *J. Am. Chem. Soc.* **2005**; *127*, 9285-9289.
- (4) (a) Diedrich, C.; Grimme, S. *J. Phys. Chem. A* **2003**, *107*, 2524–2539. (b) Mori, T.; Inoue, Y.; Grimme, S. *J. Org. Chem.* **2006**, *71*, 9797–9806. (c) Crawford, T. D.; Tam, M. C.; Abrams, M. L. *J. Phys. Chem. A* **2007**, *111*, 12057–12068. (d) Stephens, P. J.; Devlin, F. J.; Gasparrini, F.; Ciogli, A.; Spinelli, D.; Cosimelli, B. *J. Org. Chem.* **2007**, *72*, 4707–4715. (e) King, E. D.; Tao, P.; Sanan, T. T.; Hadad, C. M.; Parquette, J. R. *Org. Lett.* **2008**, *10*, 1671-1674.
